# Supplementary material for: Improved Salinity Tolerance-Associated Variables Observed in EMS Mutagenized Wheat Lines
Source: MDPI journal article supplement (doi:10.3390/ijms231911386), 2022-09-27
Supplement: s1 [file s1]

## Supplementary information, Table S1 and Figures S1 - S46

**Supplementary Table S1.** The  $p$ -values of the Wald  $F$ -statistics for the treatment terms. The asterisk (\*) indicates that a term is significant at the 0.05 level of significance ( $p \leq 0.05$ ); na = not applicable.

| Trait          | Term          |          |          |
|----------------|---------------|----------|----------|
|                | Salinity:Line | Salinity | Line     |
| sEPB 19        | 0.615         | 0.393    | * <0.001 |
| sEPB 23        | 0.603         | * 0.001  | * <0.001 |
| sEPB 28        | 0.686         | * <0.001 | * <0.001 |
| sEPB 32        | 0.476         | * <0.001 | * <0.001 |
| sEPB 38        | * 0.015       | na       | na       |
| sEPB AGR 19-23 | 0.264         | * <0.001 | * <0.001 |
| sEPB AGR 23-28 | 0.583         | * <0.001 | * <0.001 |
| sEPB AGR 28-32 | * 0.048       | na       | na       |
| sEPB AGR 32-38 | * <0.001      | na       | na       |
| sEPB RGR 19-23 | 0.111         | * <0.001 | * <0.001 |
| sEPB RGR 23-28 | 0.576         | * <0.001 | * <0.001 |
| sEPB RGR 28-32 | 0.247         | * <0.001 | * <0.001 |
| sEPB RGR 32-38 | 0.050         | * <0.001 | * <0.001 |
| Na (DW)        | * <0.001      | na       | na       |
| Na (aqueous)   | * <0.001      | na       | na       |
| K (DW)         | 0.051         | * <0.001 | * <0.001 |
| K (aqueous)    | 0.150         | * <0.001 | * <0.001 |
| Cl (DW)        | * <0.001      | na       | na       |
| Cl (aqueous)   | * <0.001      | na       | na       |
| Na:K           | * <0.001      | na       | na       |
| Na:Cl          | * <0.001      | na       | na       |
| K:Cl           | * <0.001      | na       | na       |
| sWU 19-23      | 0.095         | * <0.001 | * <0.001 |
| sWU 23-28      | * 0.005       | na       | na       |
| sWU 28-32      | * 0.002       | na       | na       |
| sWU 32-38      | * <0.001      | na       | na       |
| sWUI 19-23     | 0.410         | * <0.001 | * <0.001 |
| sWUI 23-28     | 0.816         | * <0.001 | * <0.001 |
| sWUI 28-32     | 0.227         | * <0.001 | * <0.001 |
| sWUI 32-38     | 0.067         | * <0.001 | * <0.001 |
| WU 13-38       | * <0.001      | na       | na       |
| WU 13-99       | * <0.001      | na       | na       |

Figure S1. NaCl 0mM

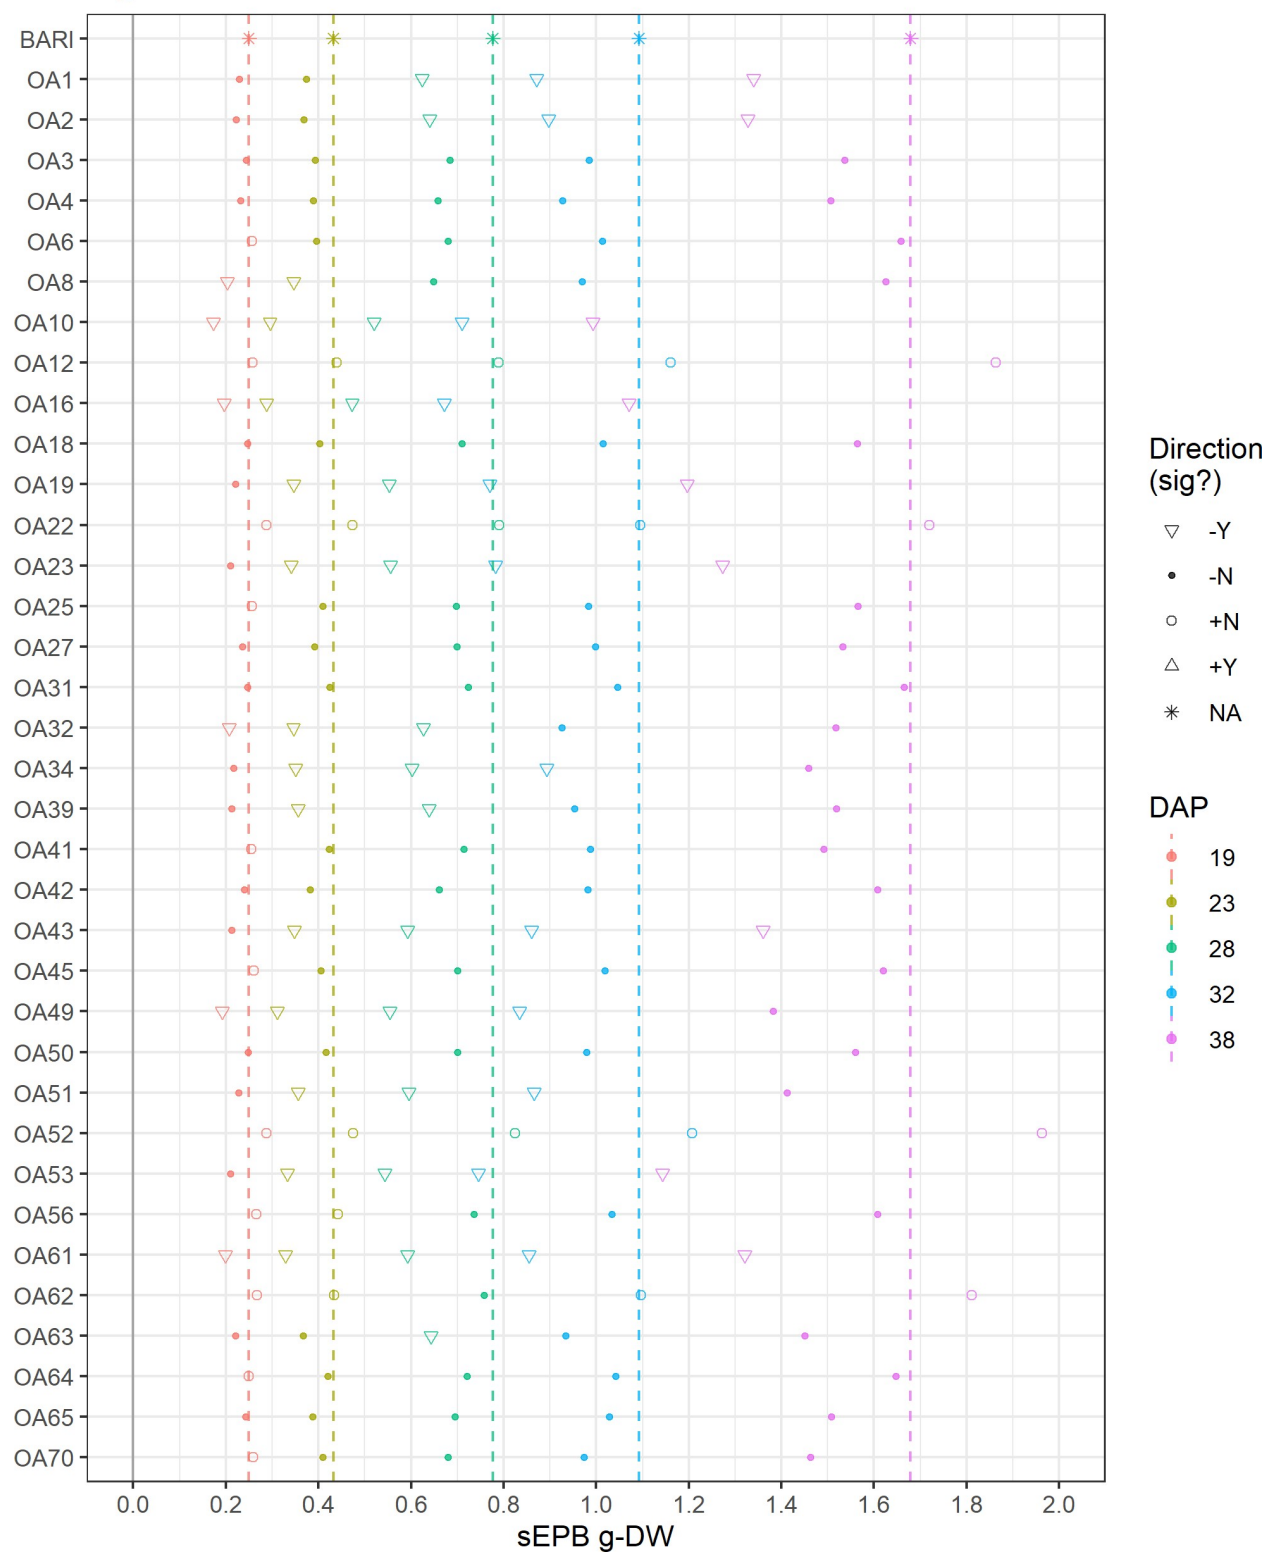

Figure S2. NaCl 40mM

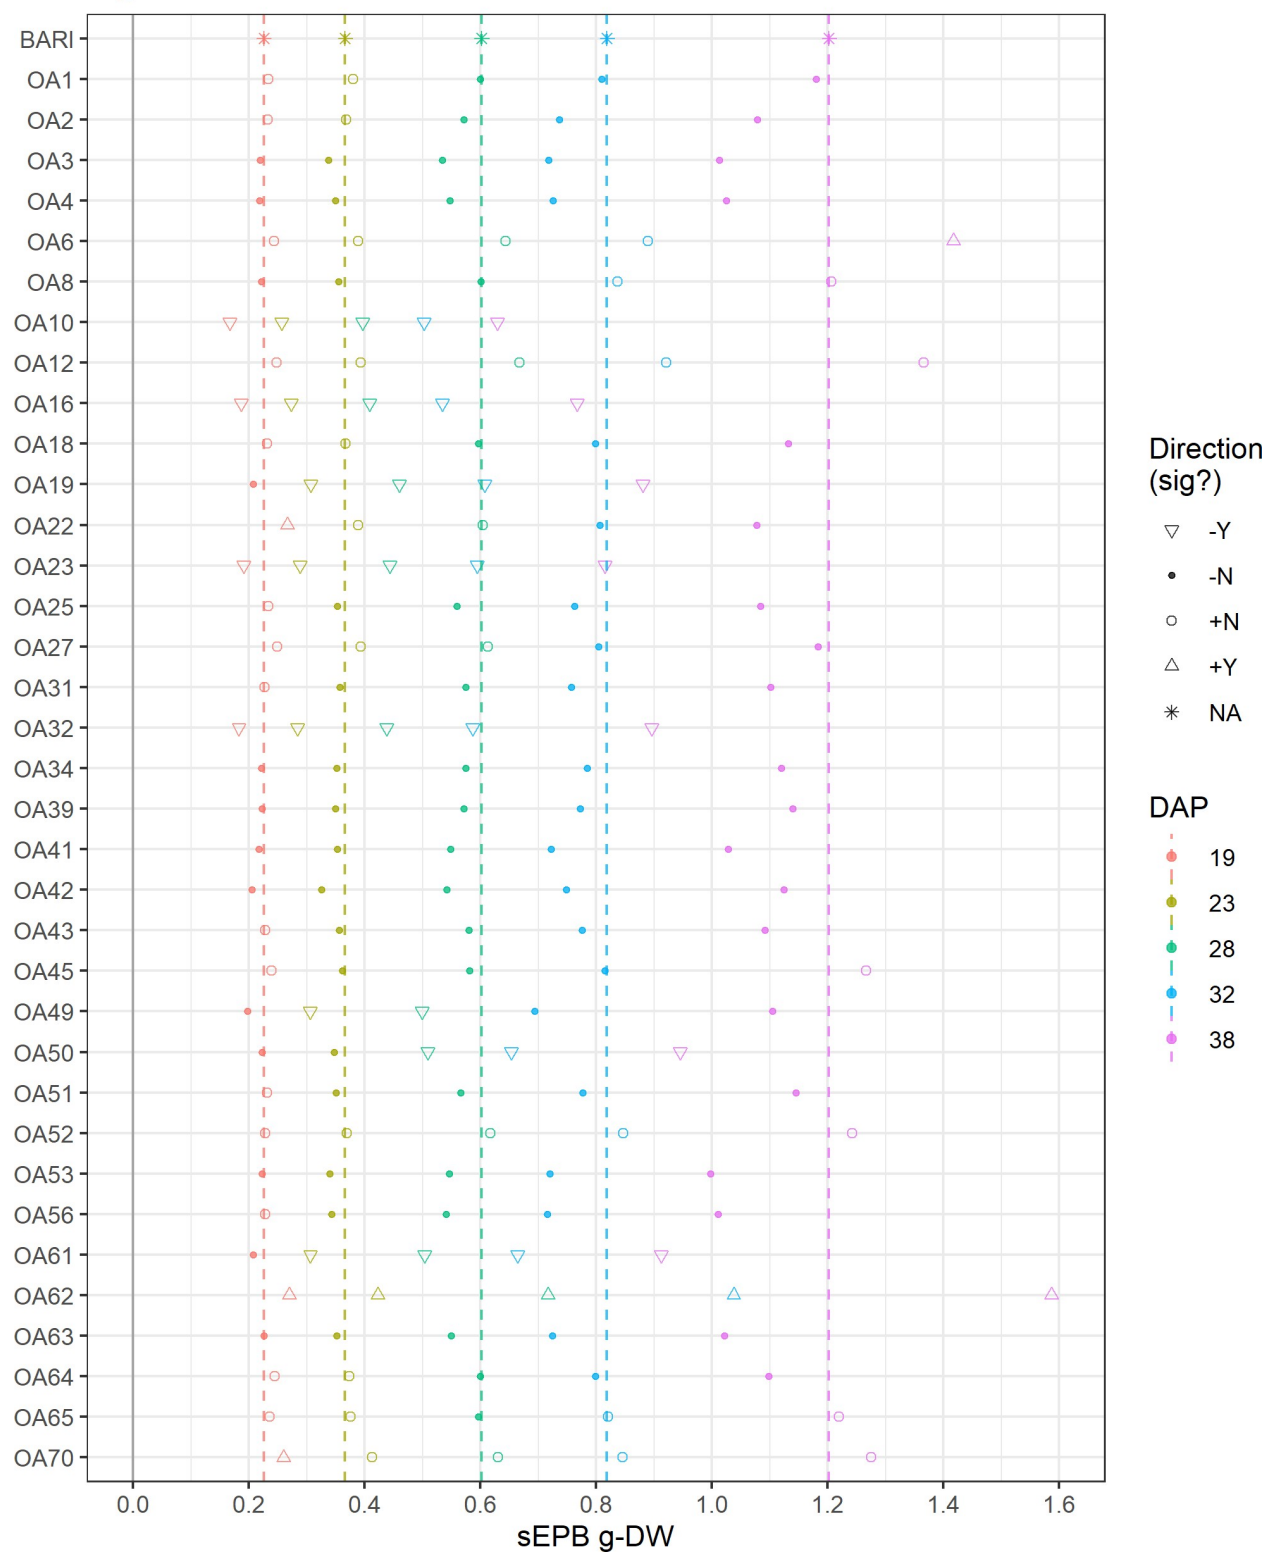

Figure S3. NaCl 80mM

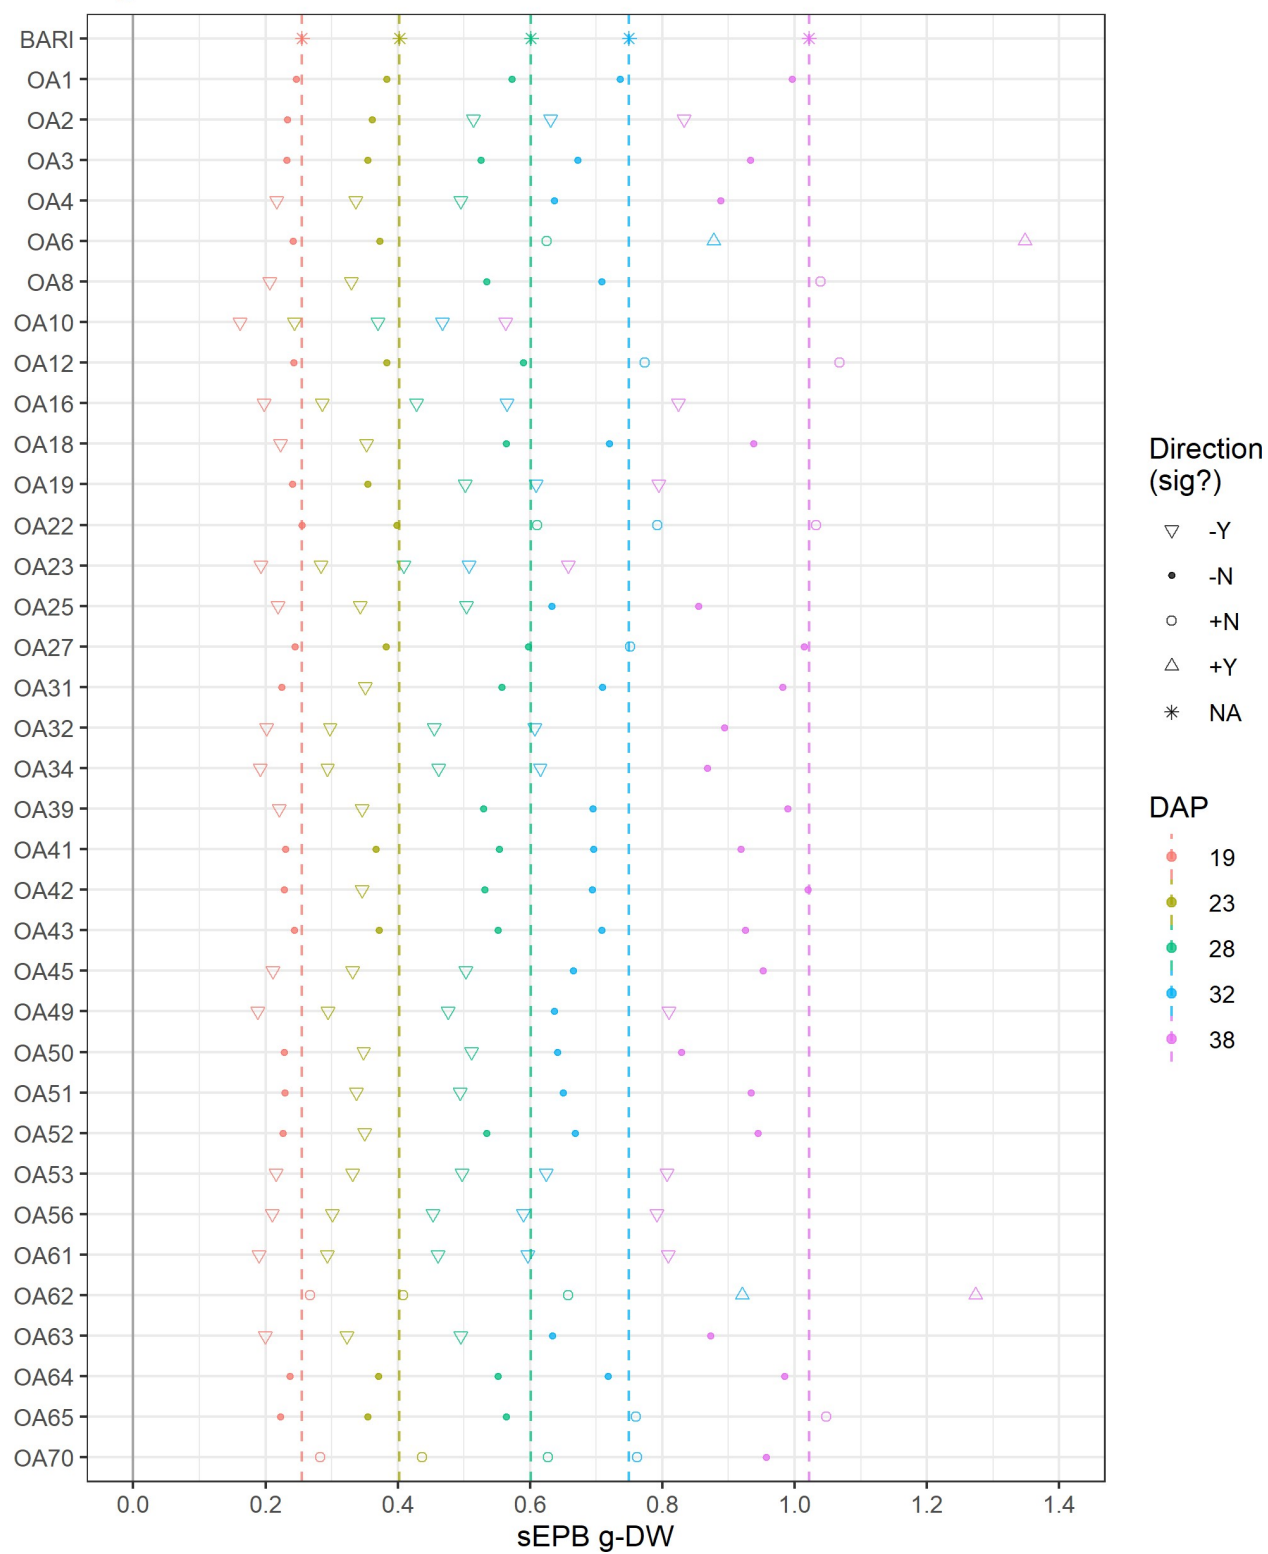

Figure S4. NaCl 120mM

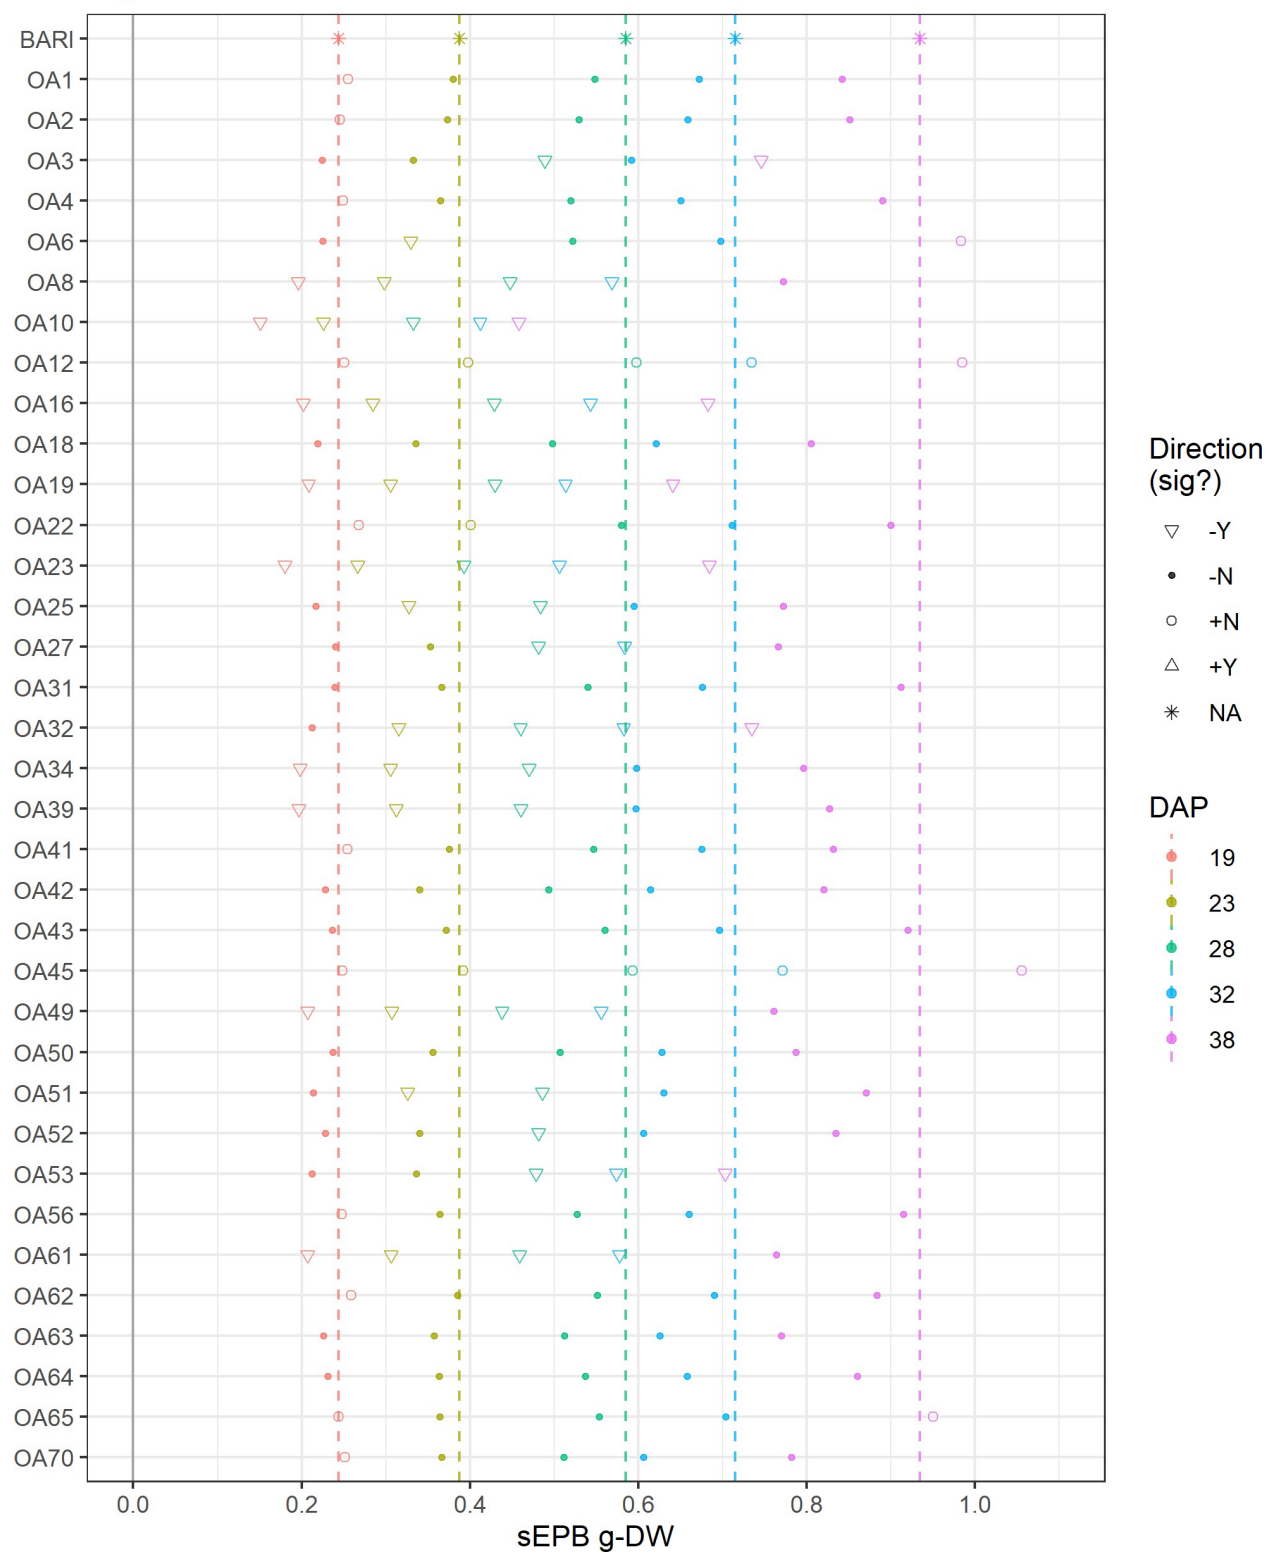

Figure S5. NaCl 160mM

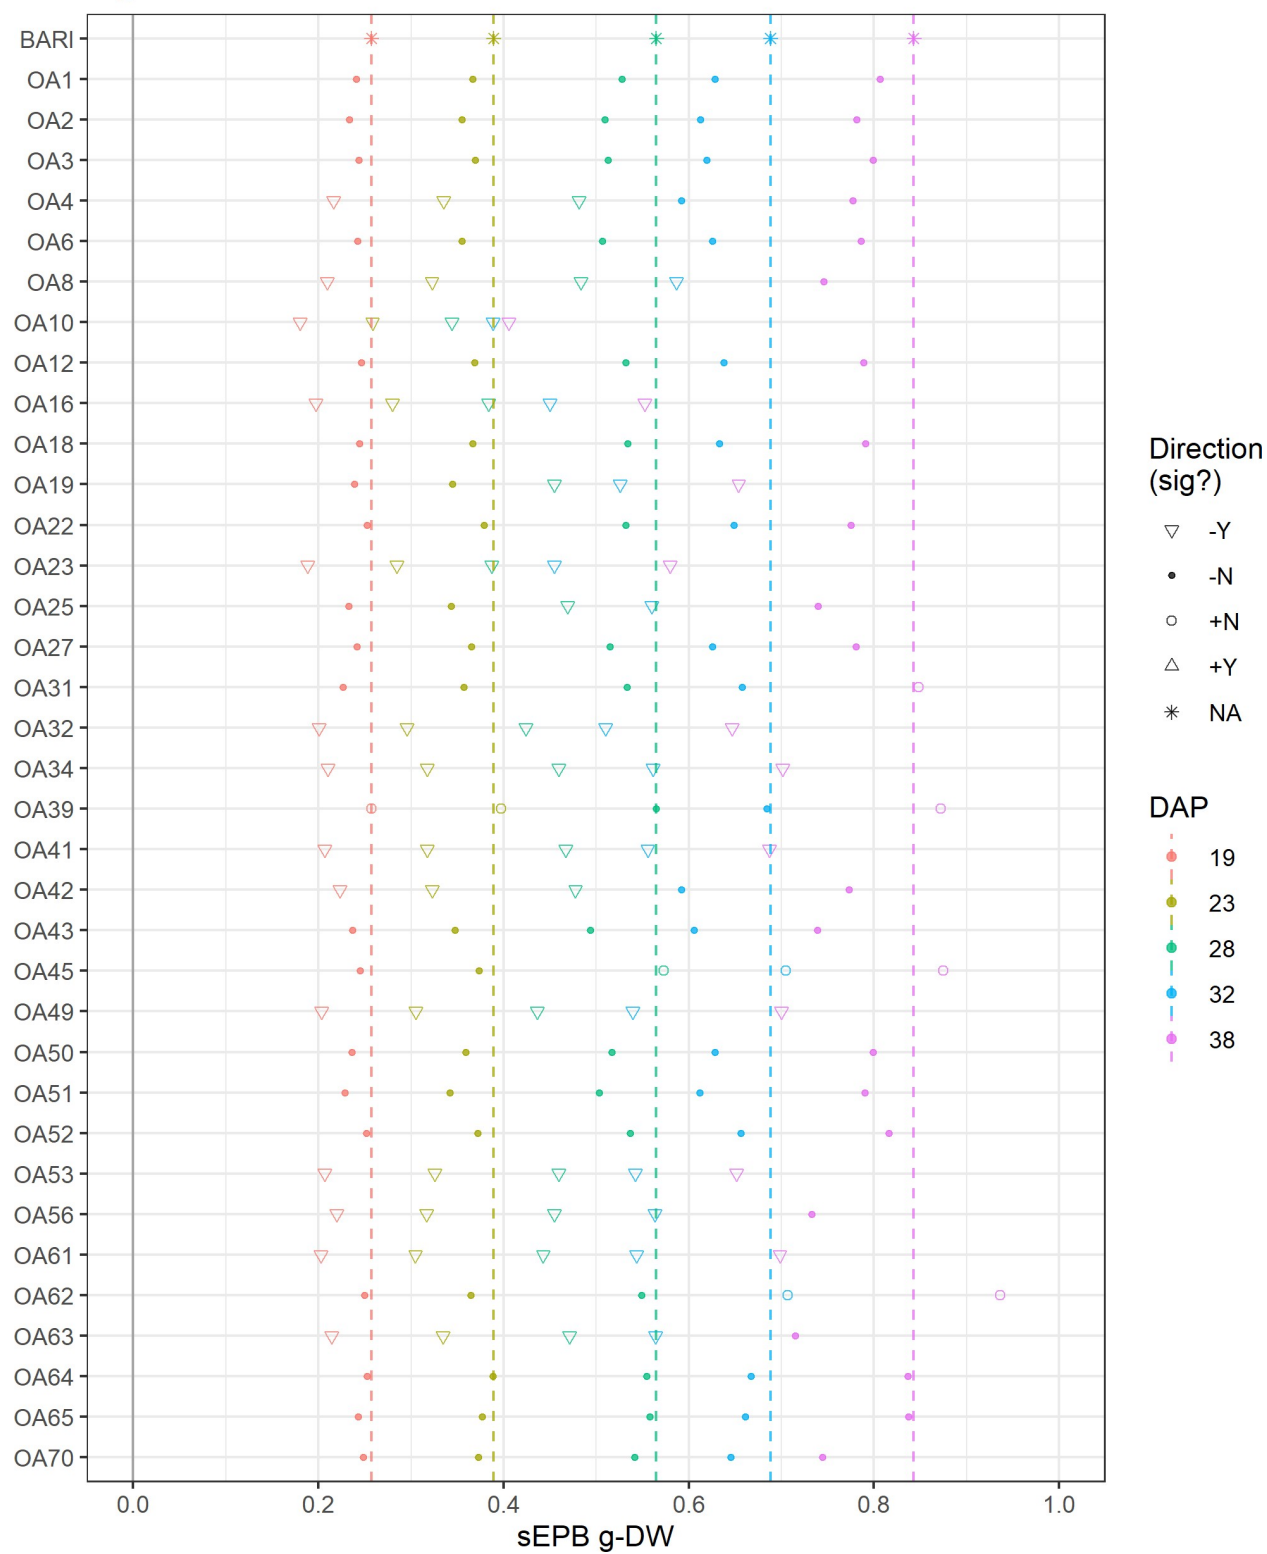

Figure S6.

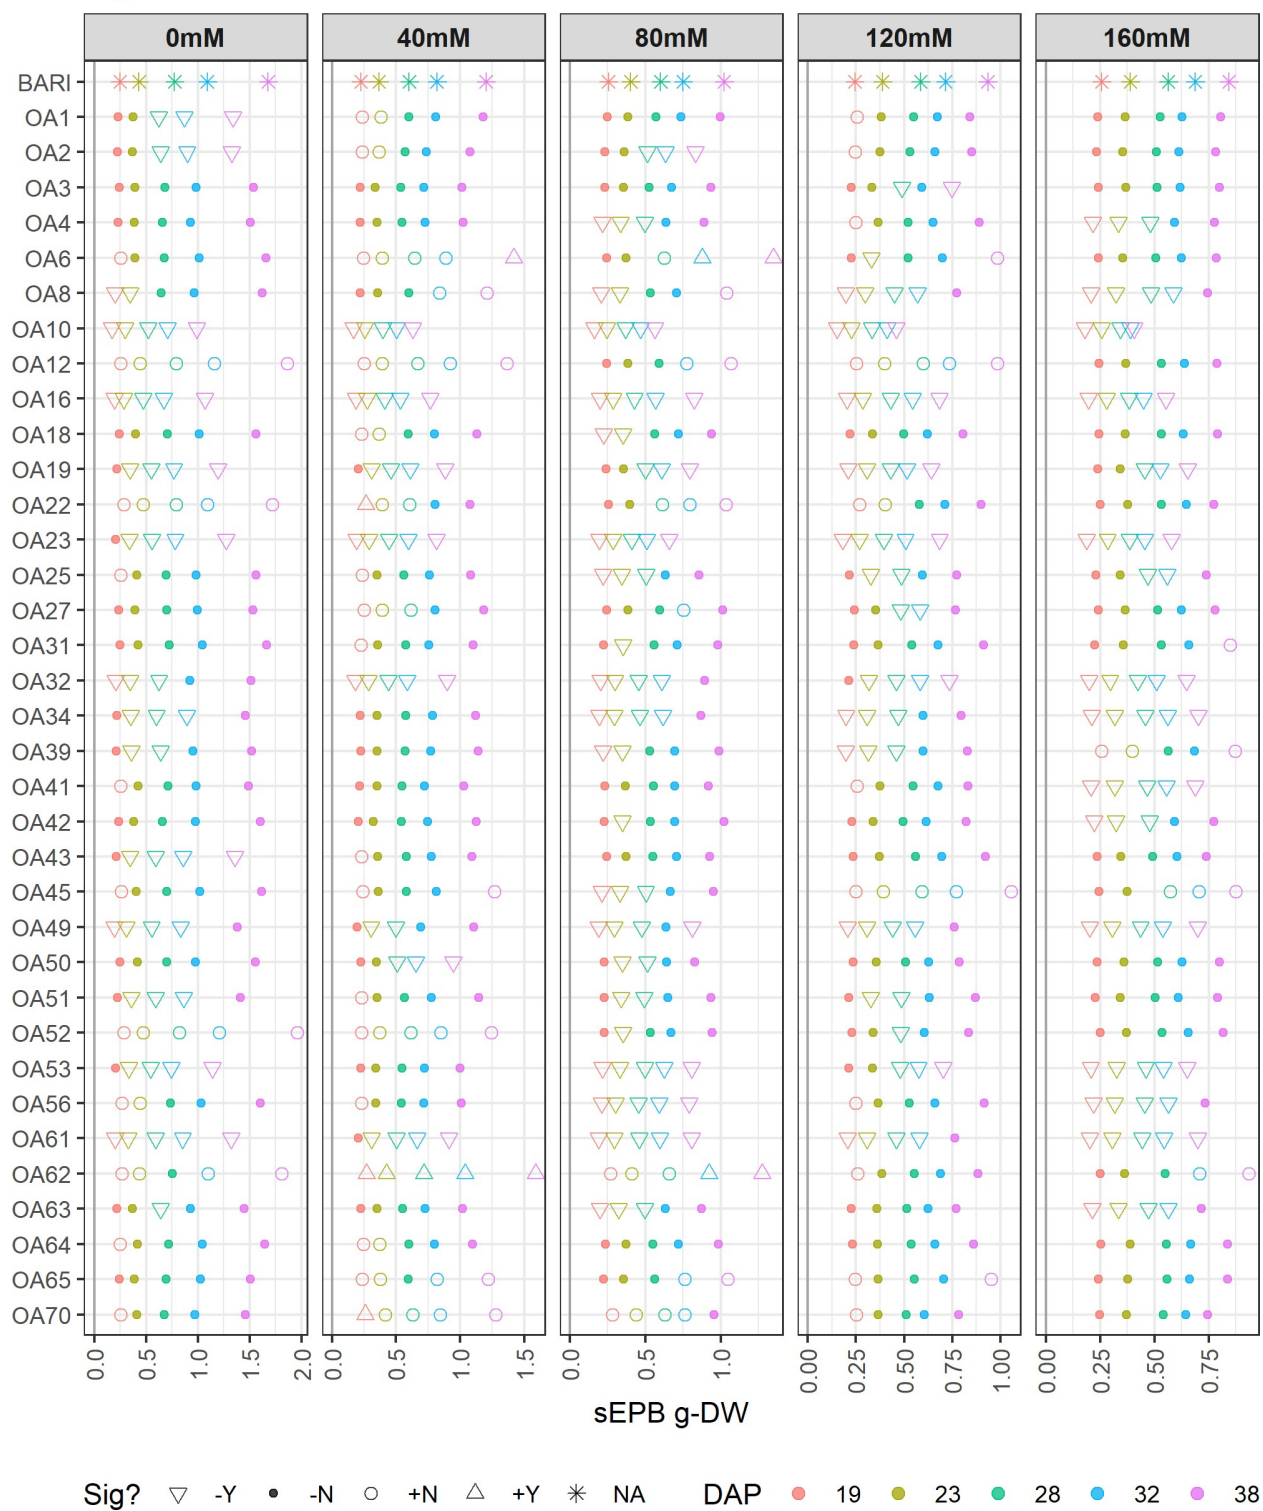

Figure S7. NaCl 0mM

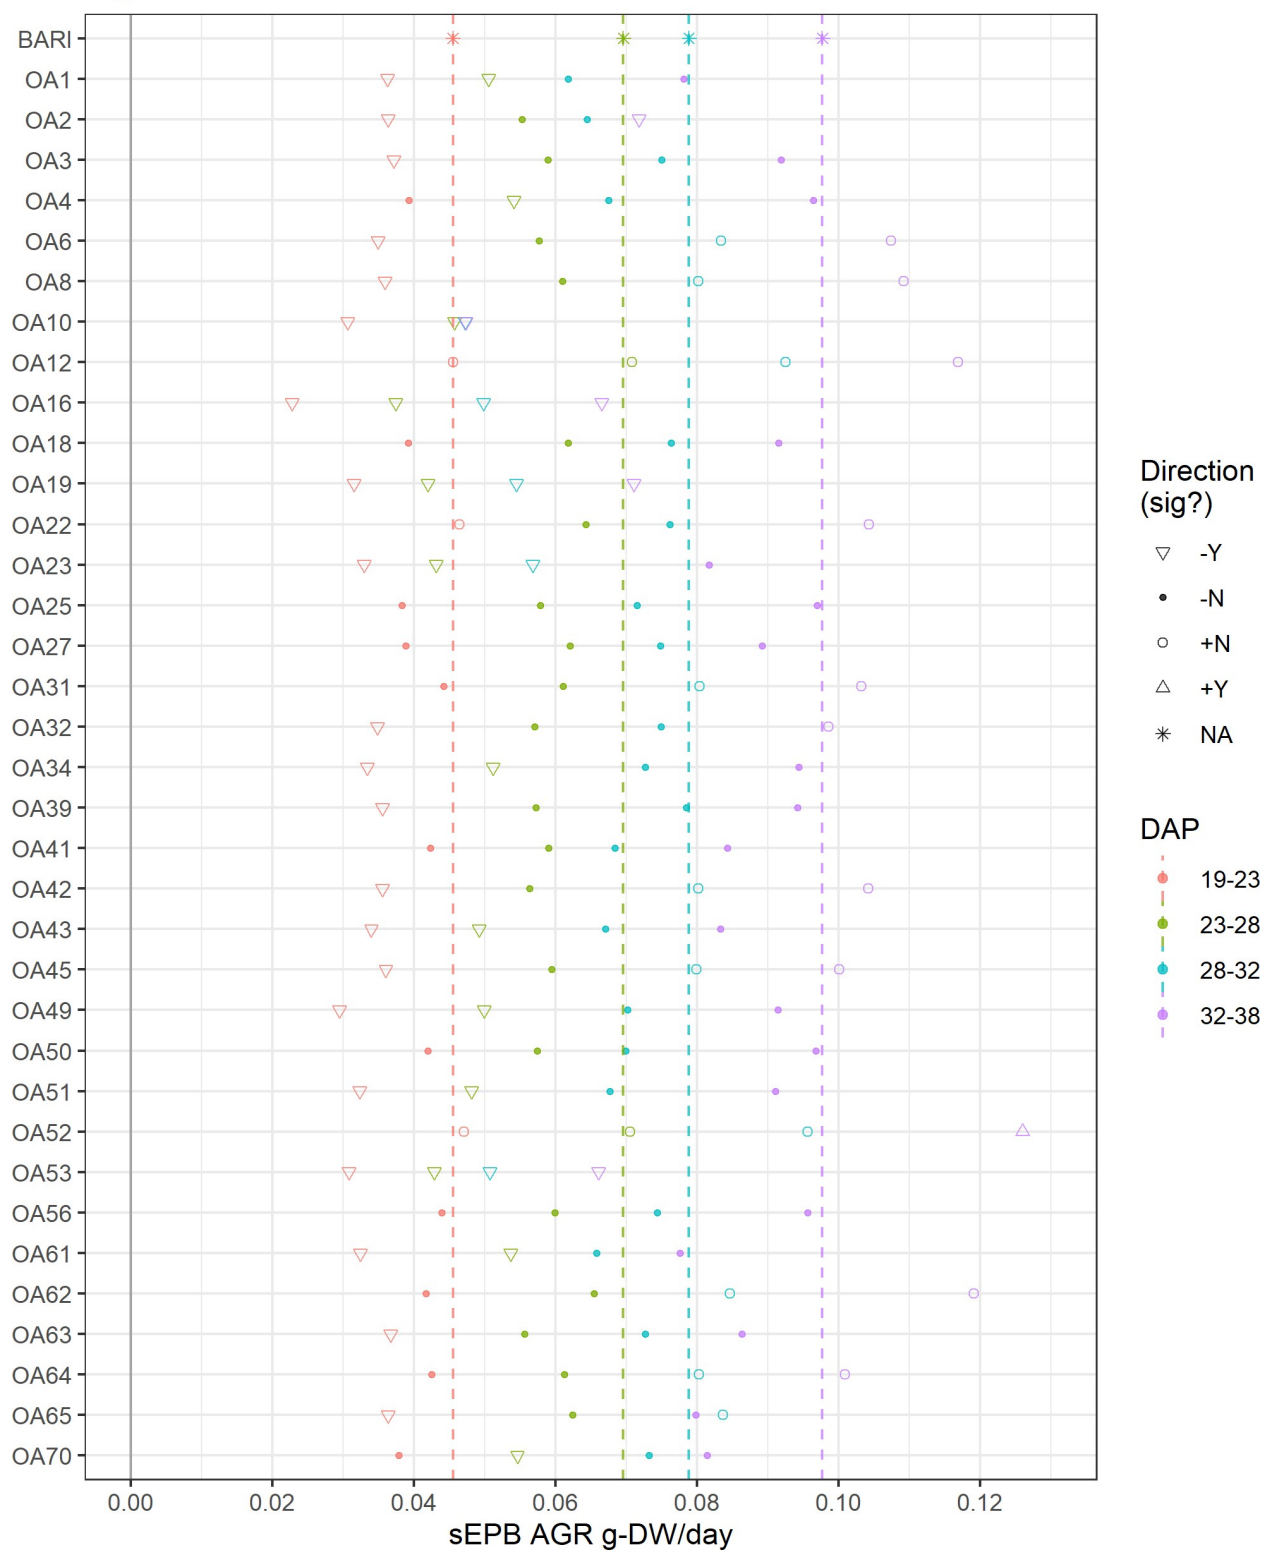

Figure S8. NaCl 40mM

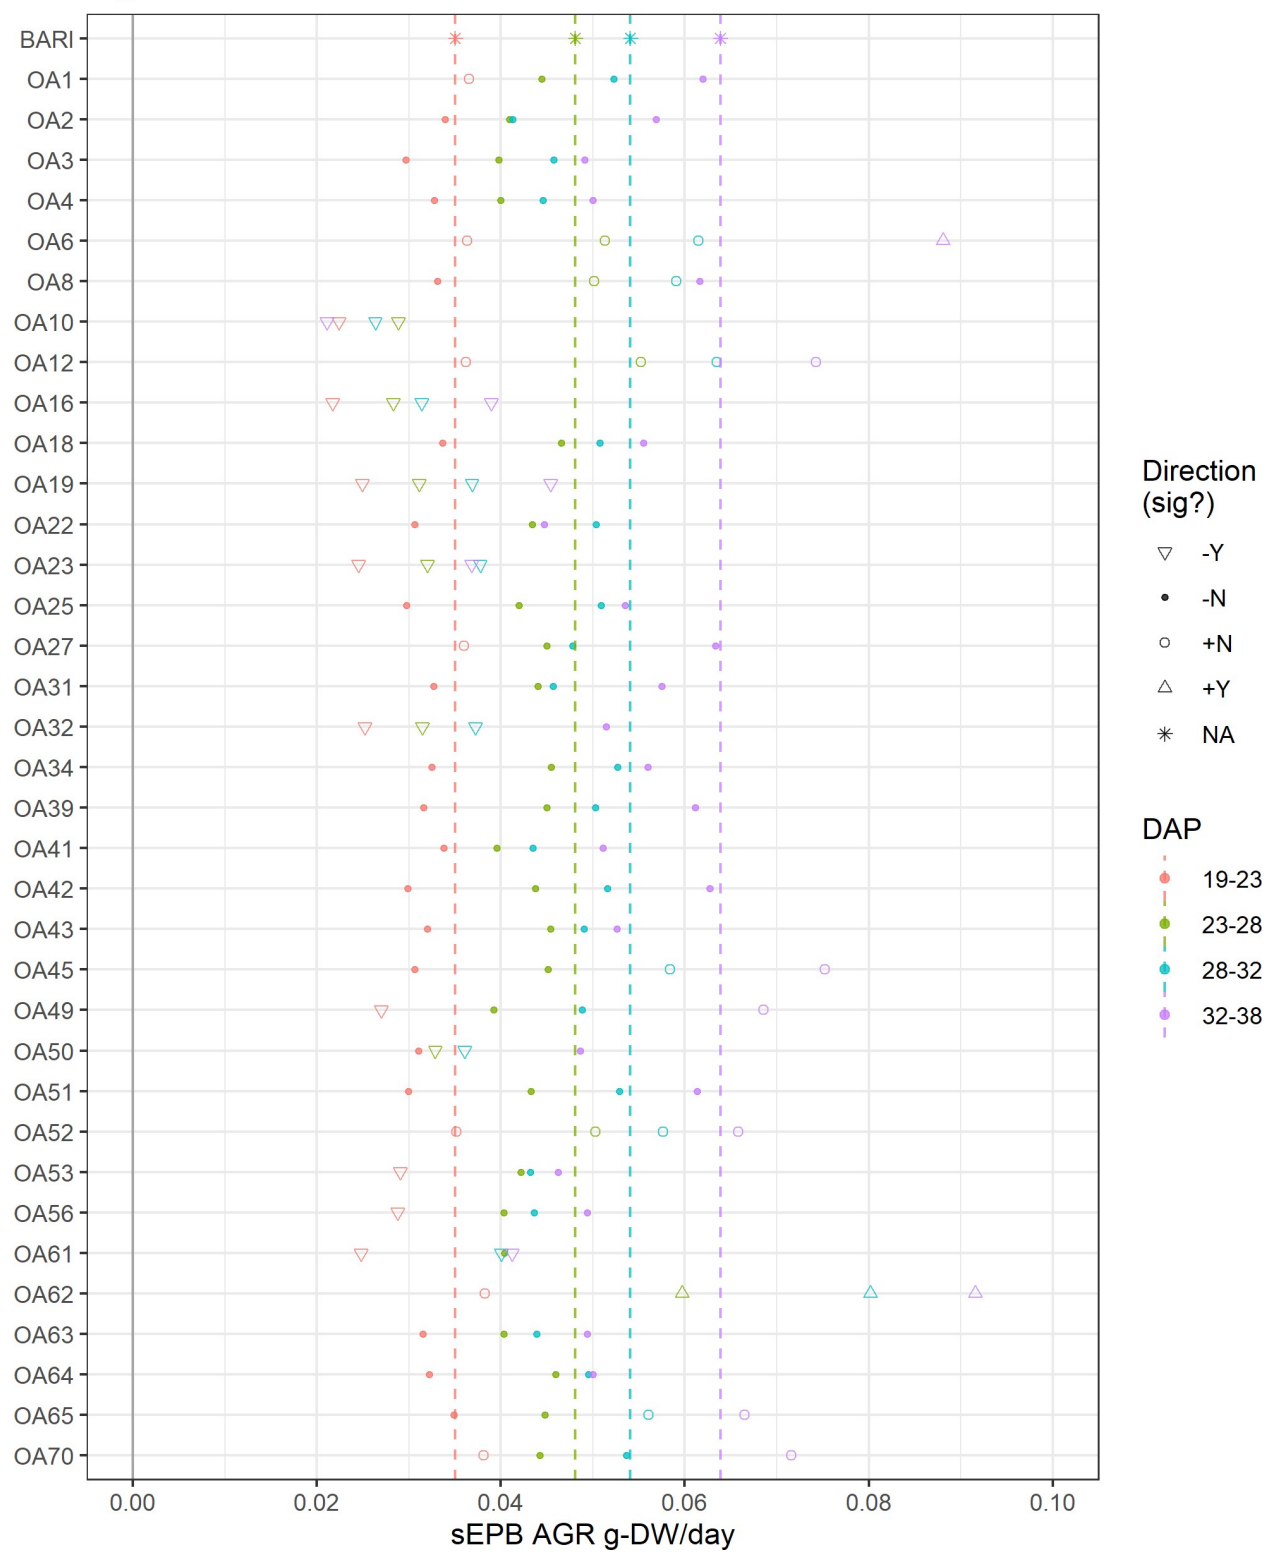

Figure S9. NaCl 80mM

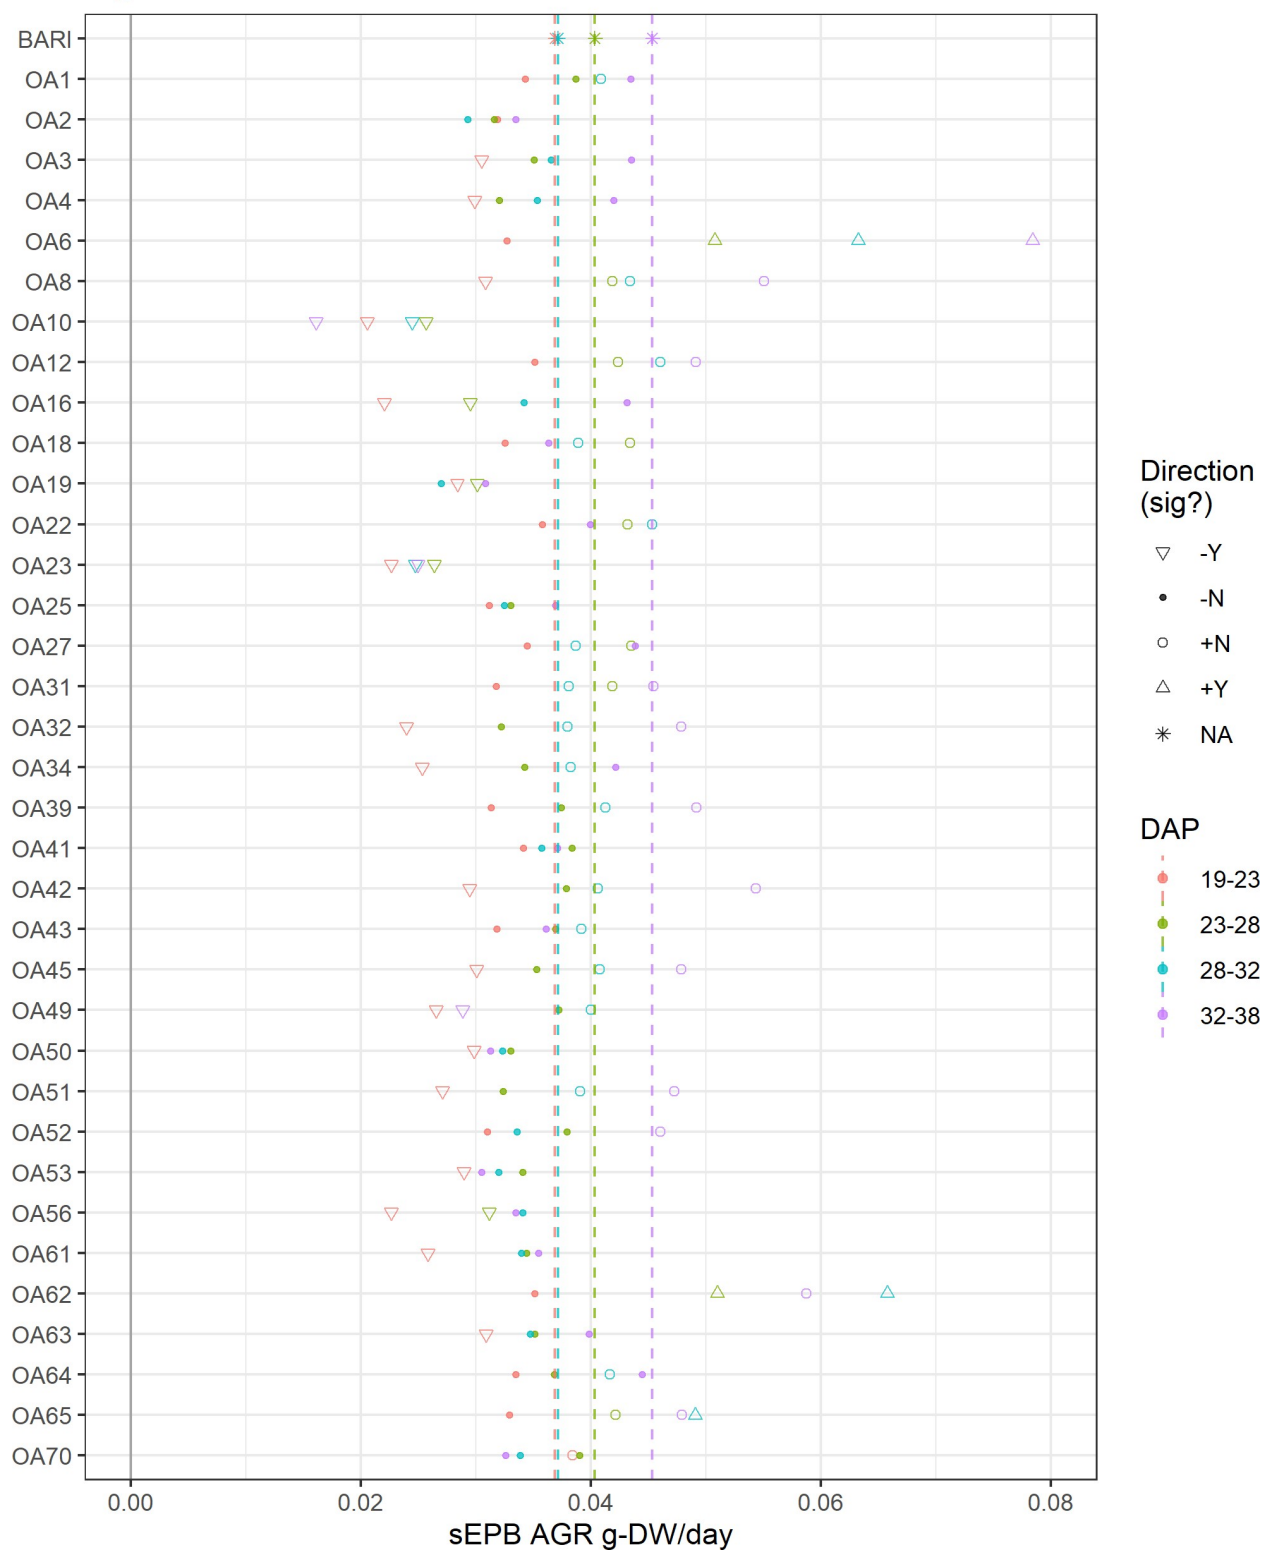

Figure S10. NaCl 120mM

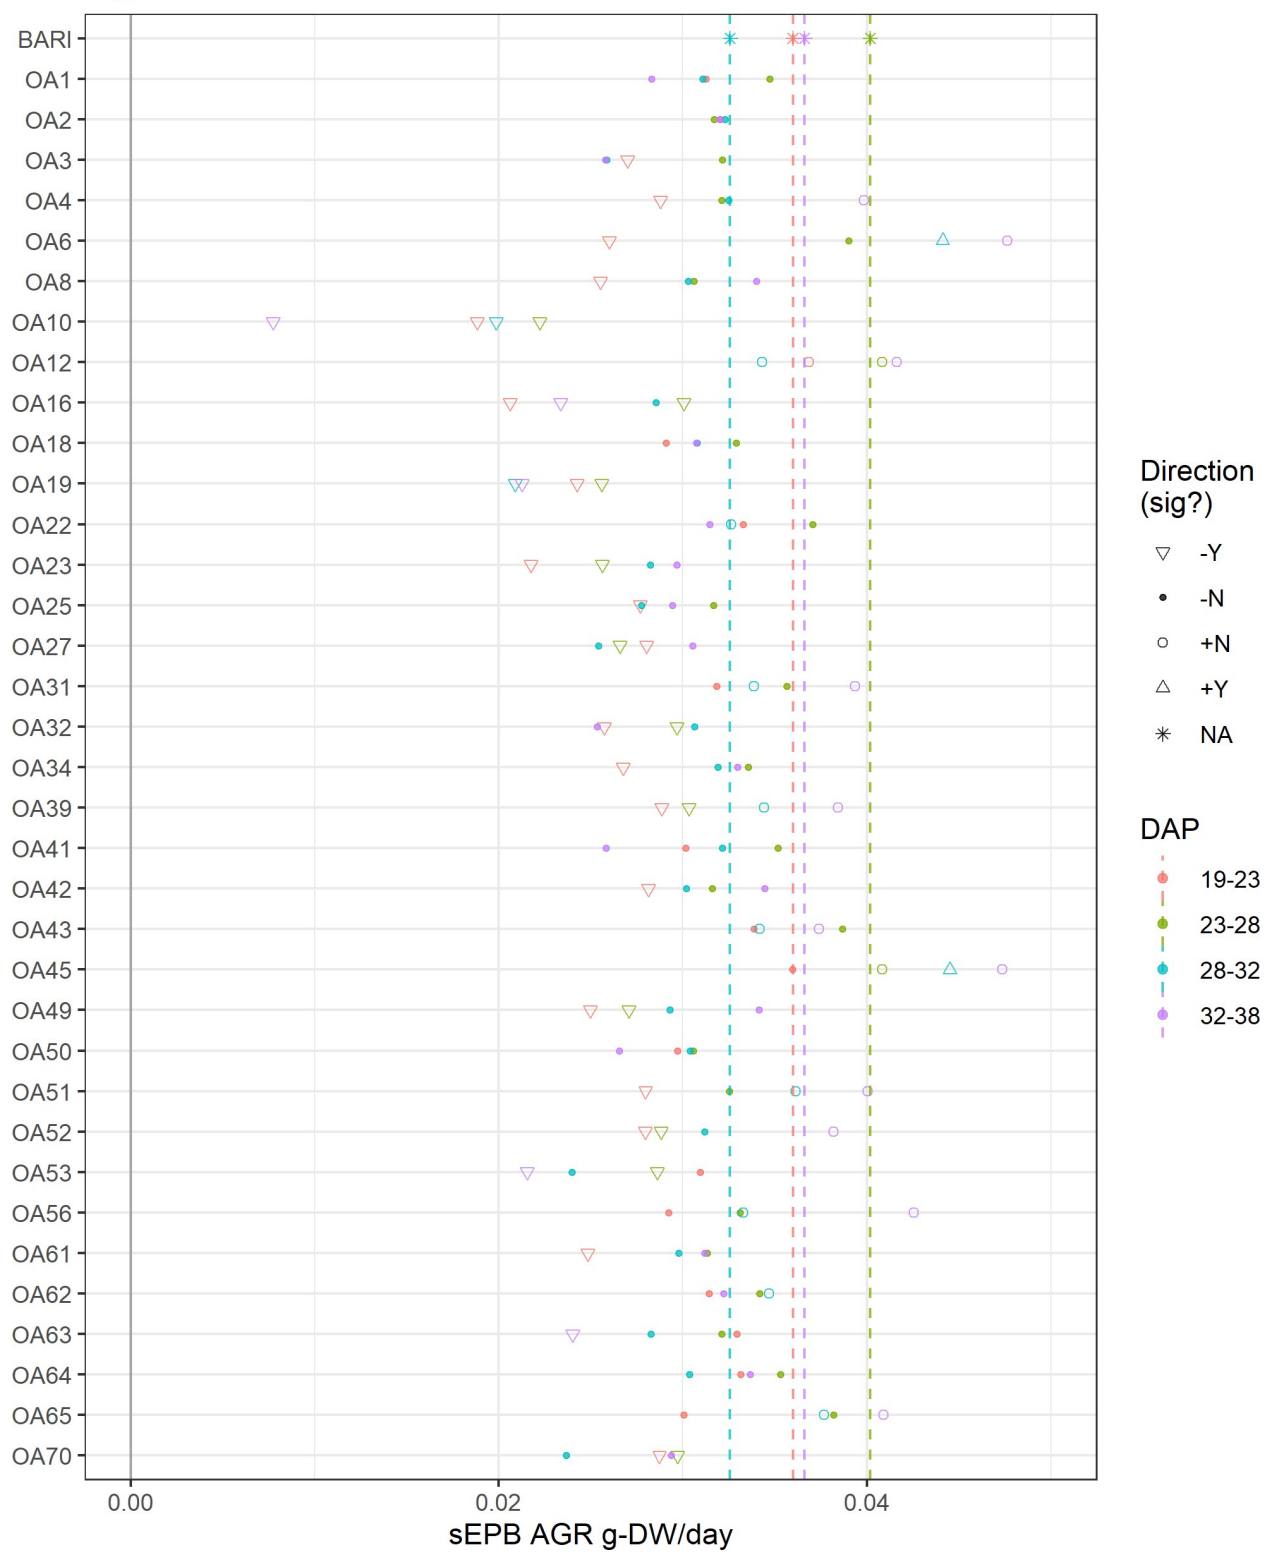

Figure S11. NaCl 160mM

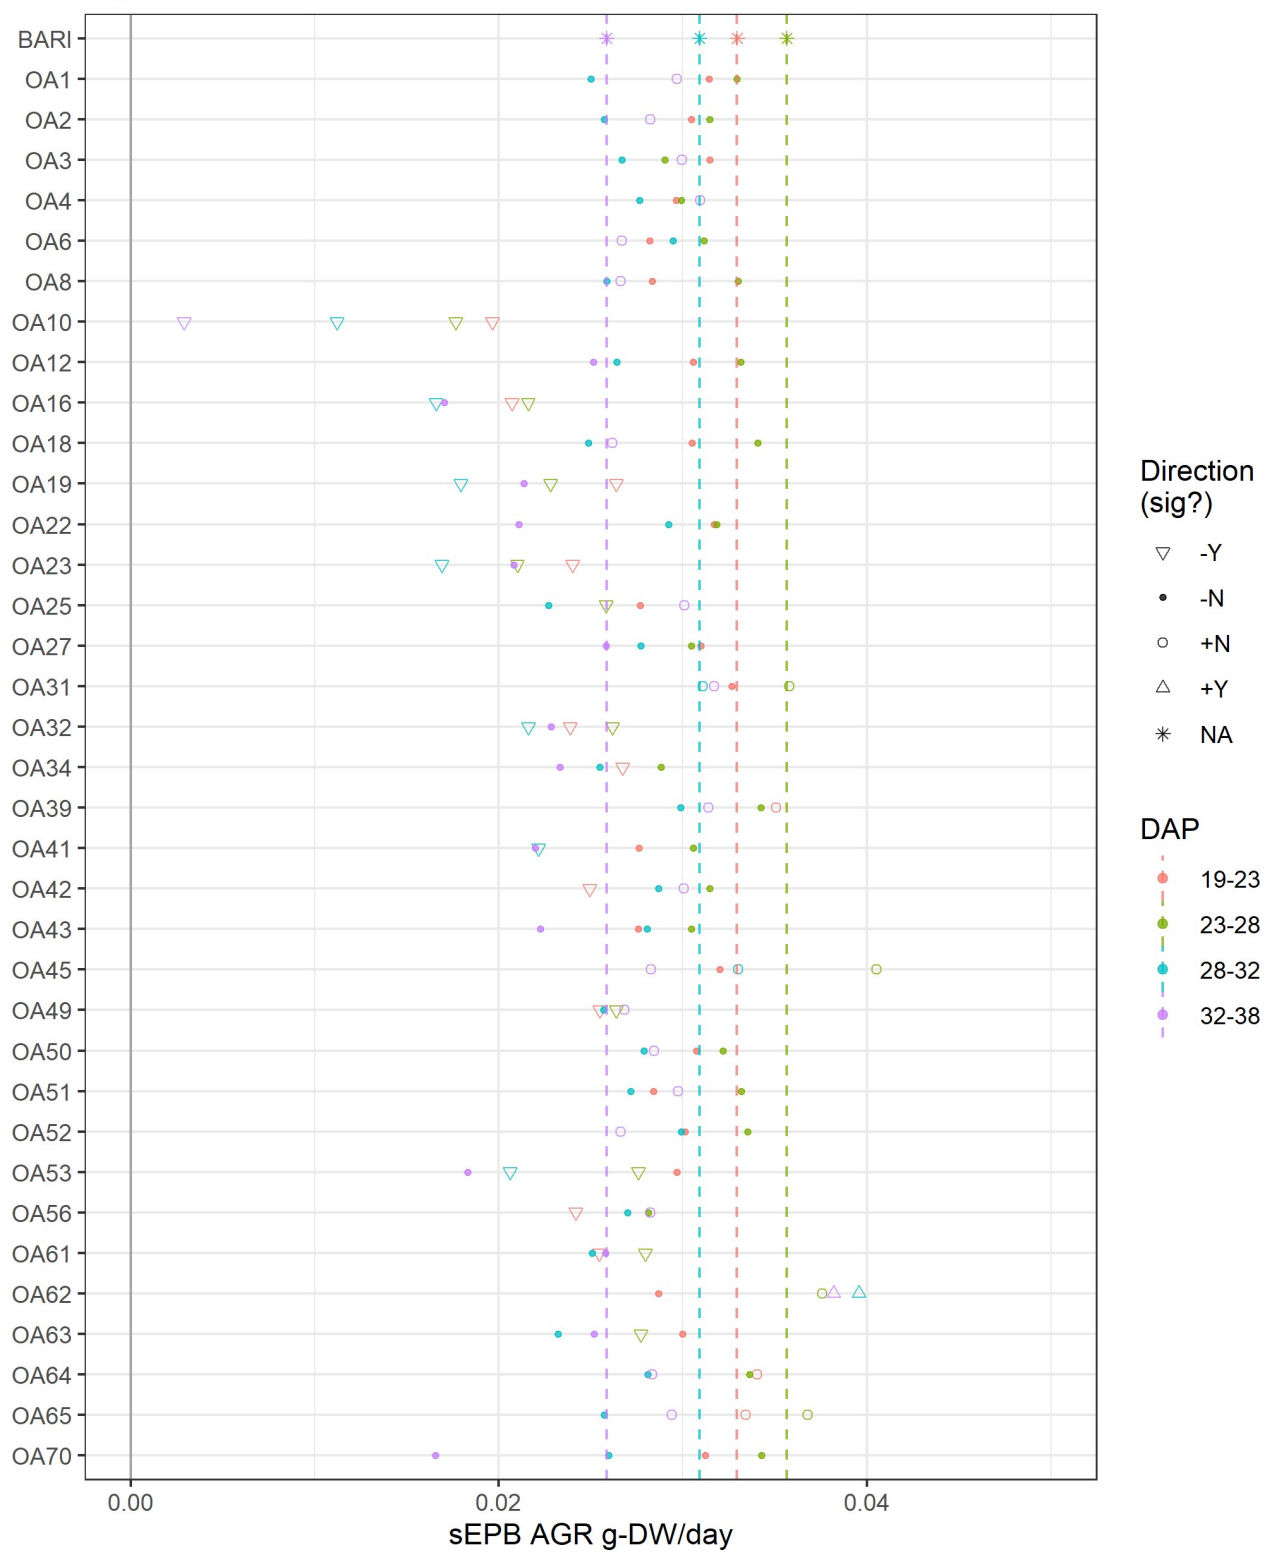

Figure S12.

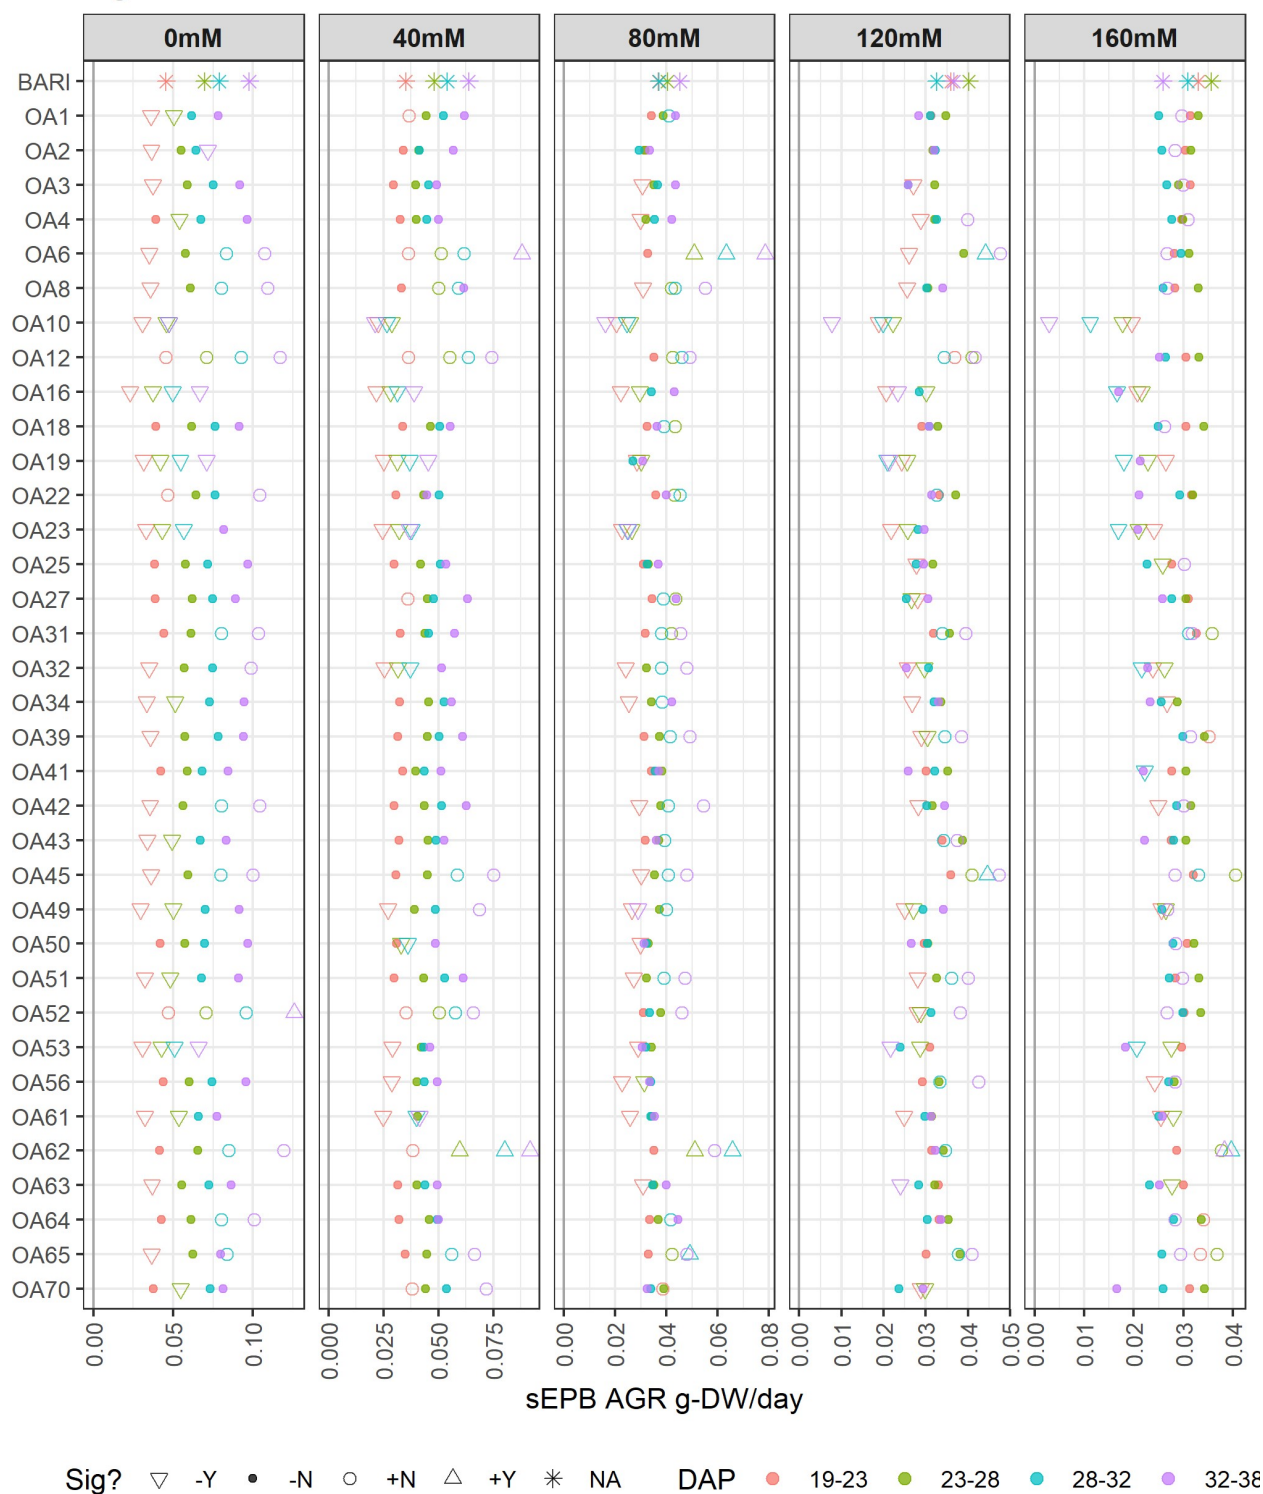

Figure S13. NaCl 0mM

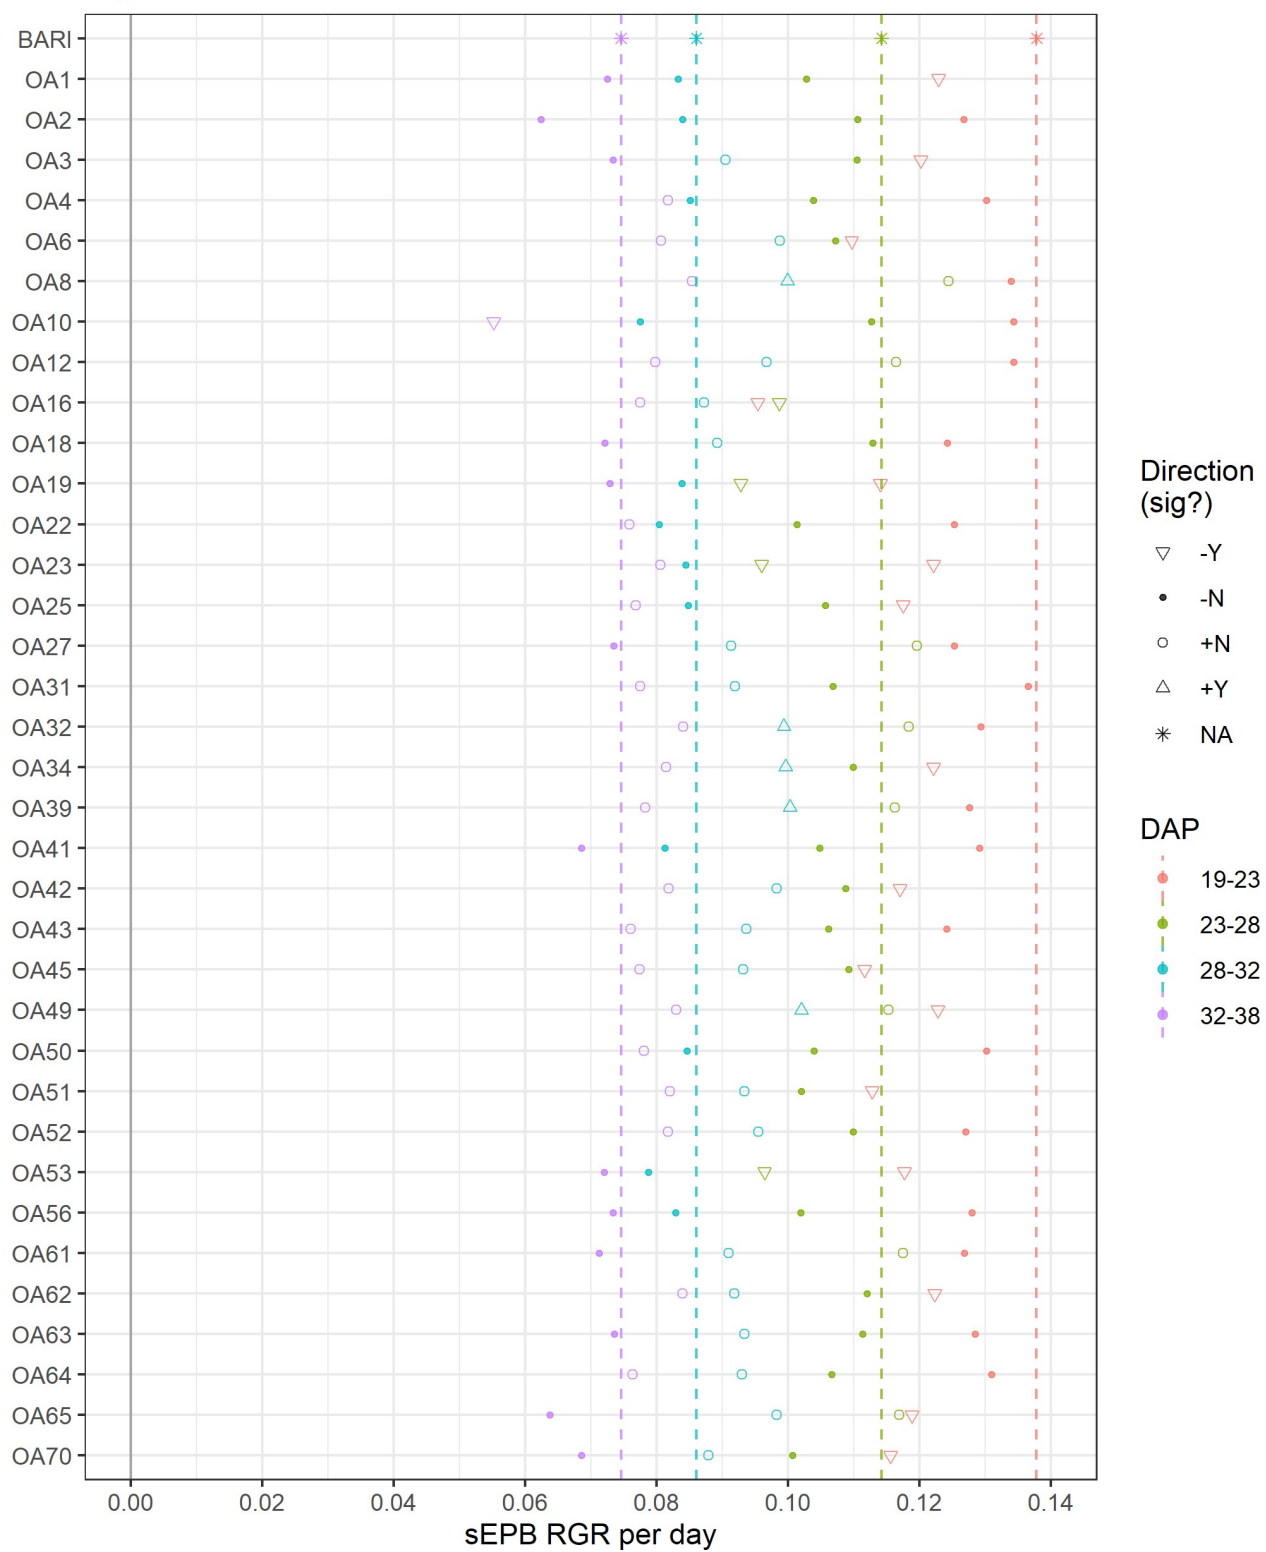

Figure S14. NaCl 40mM

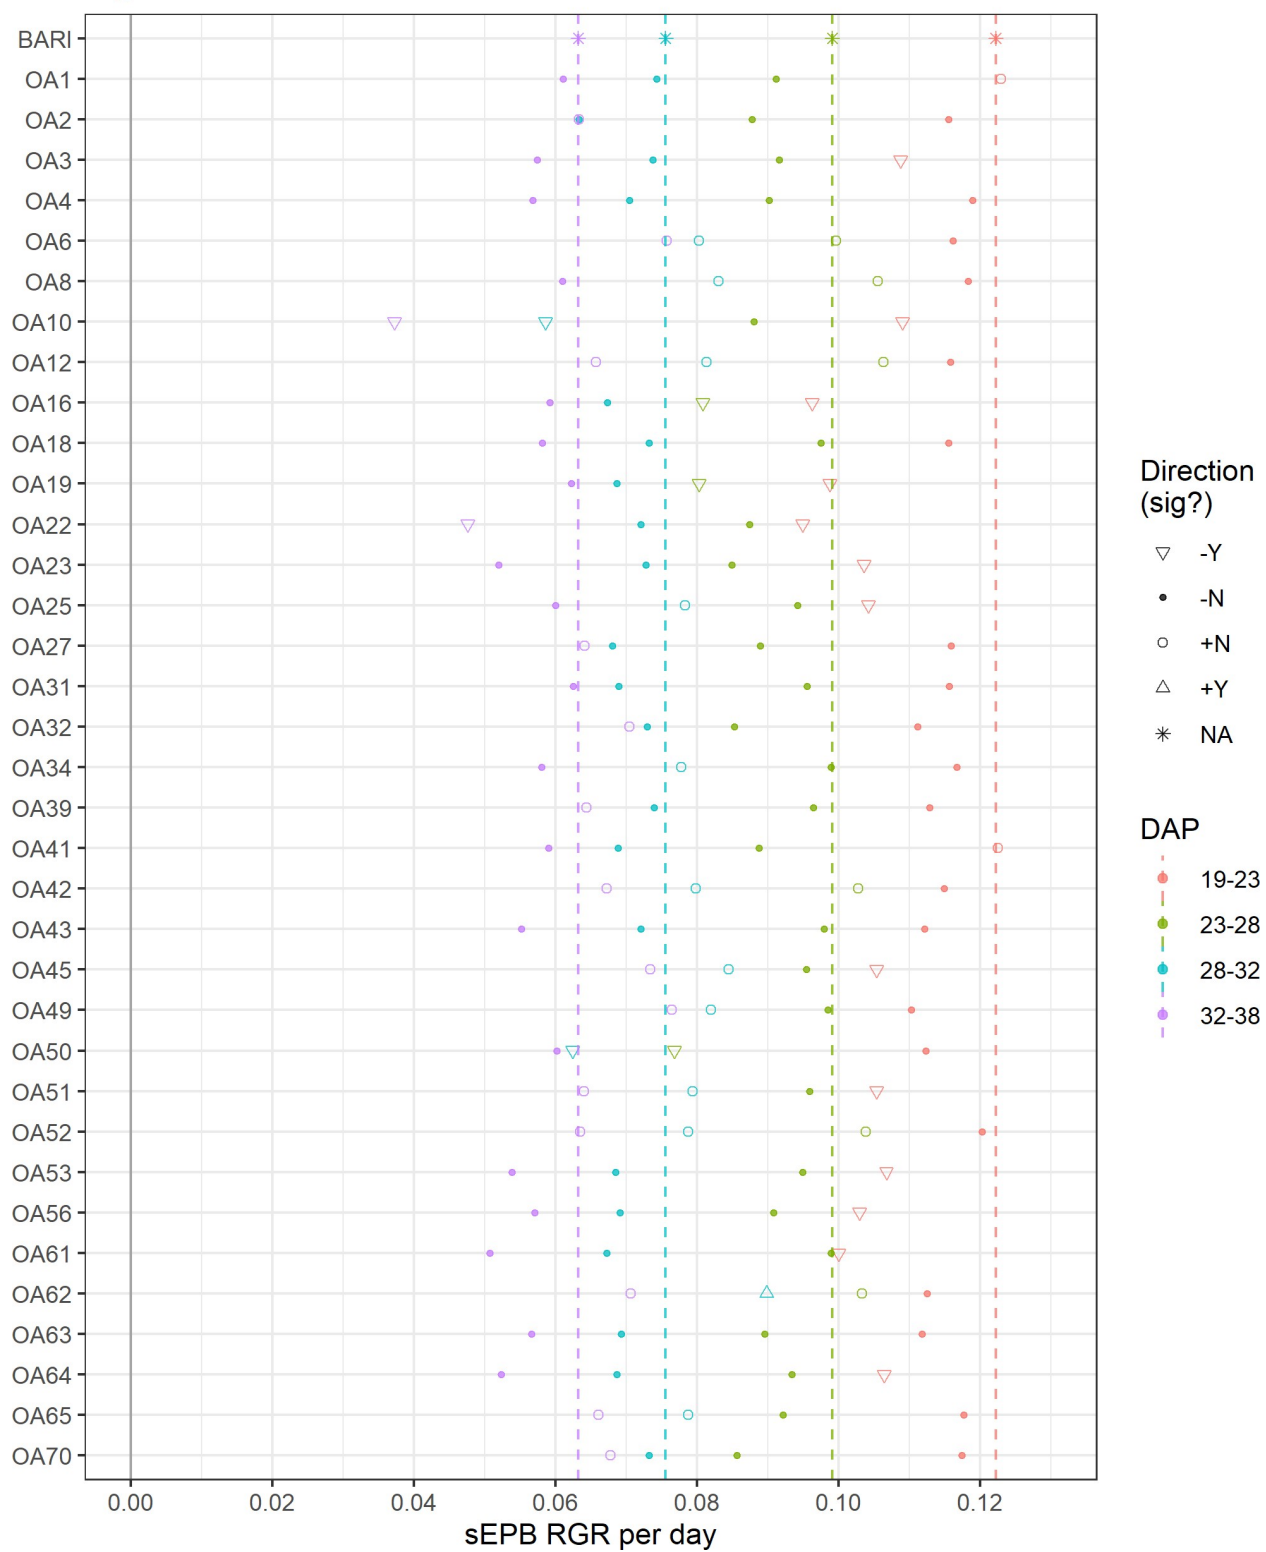

Figure S15. NaCl 80mM

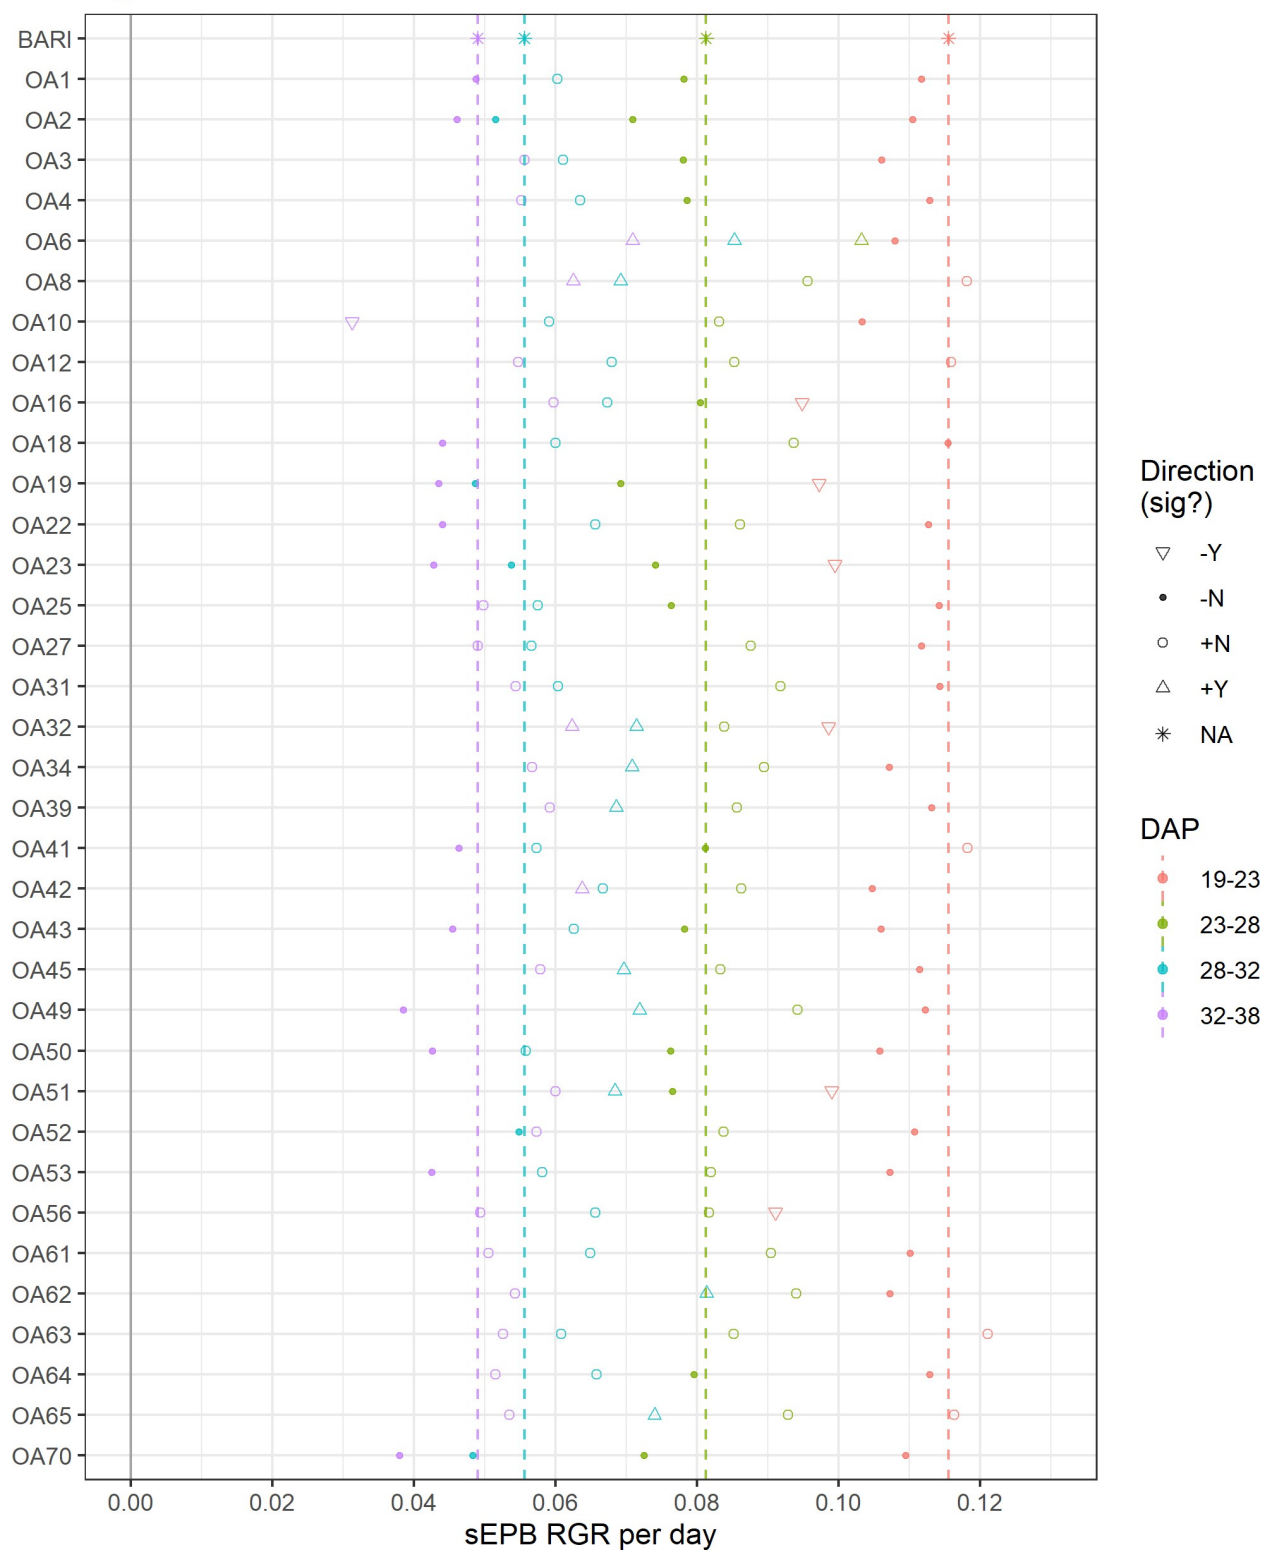

Figure S16. NaCl 120mM

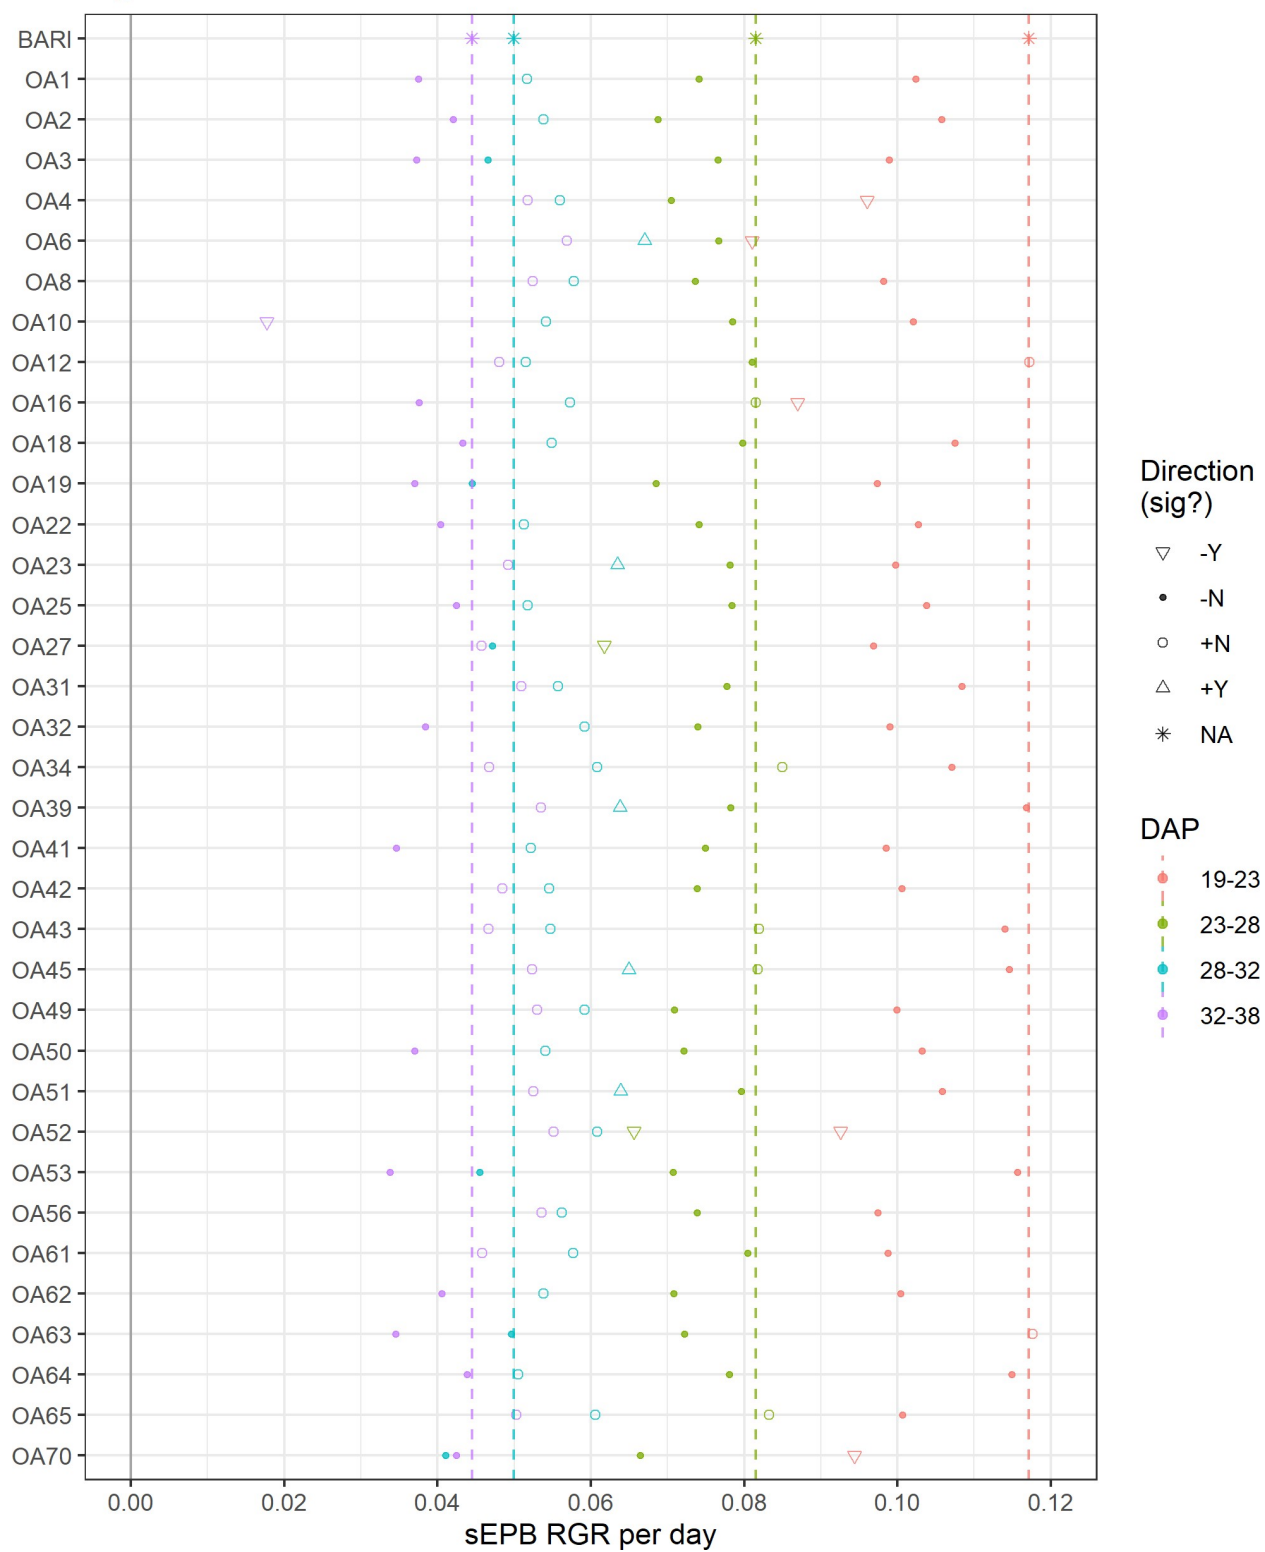

Figure S17. NaCl 160mM

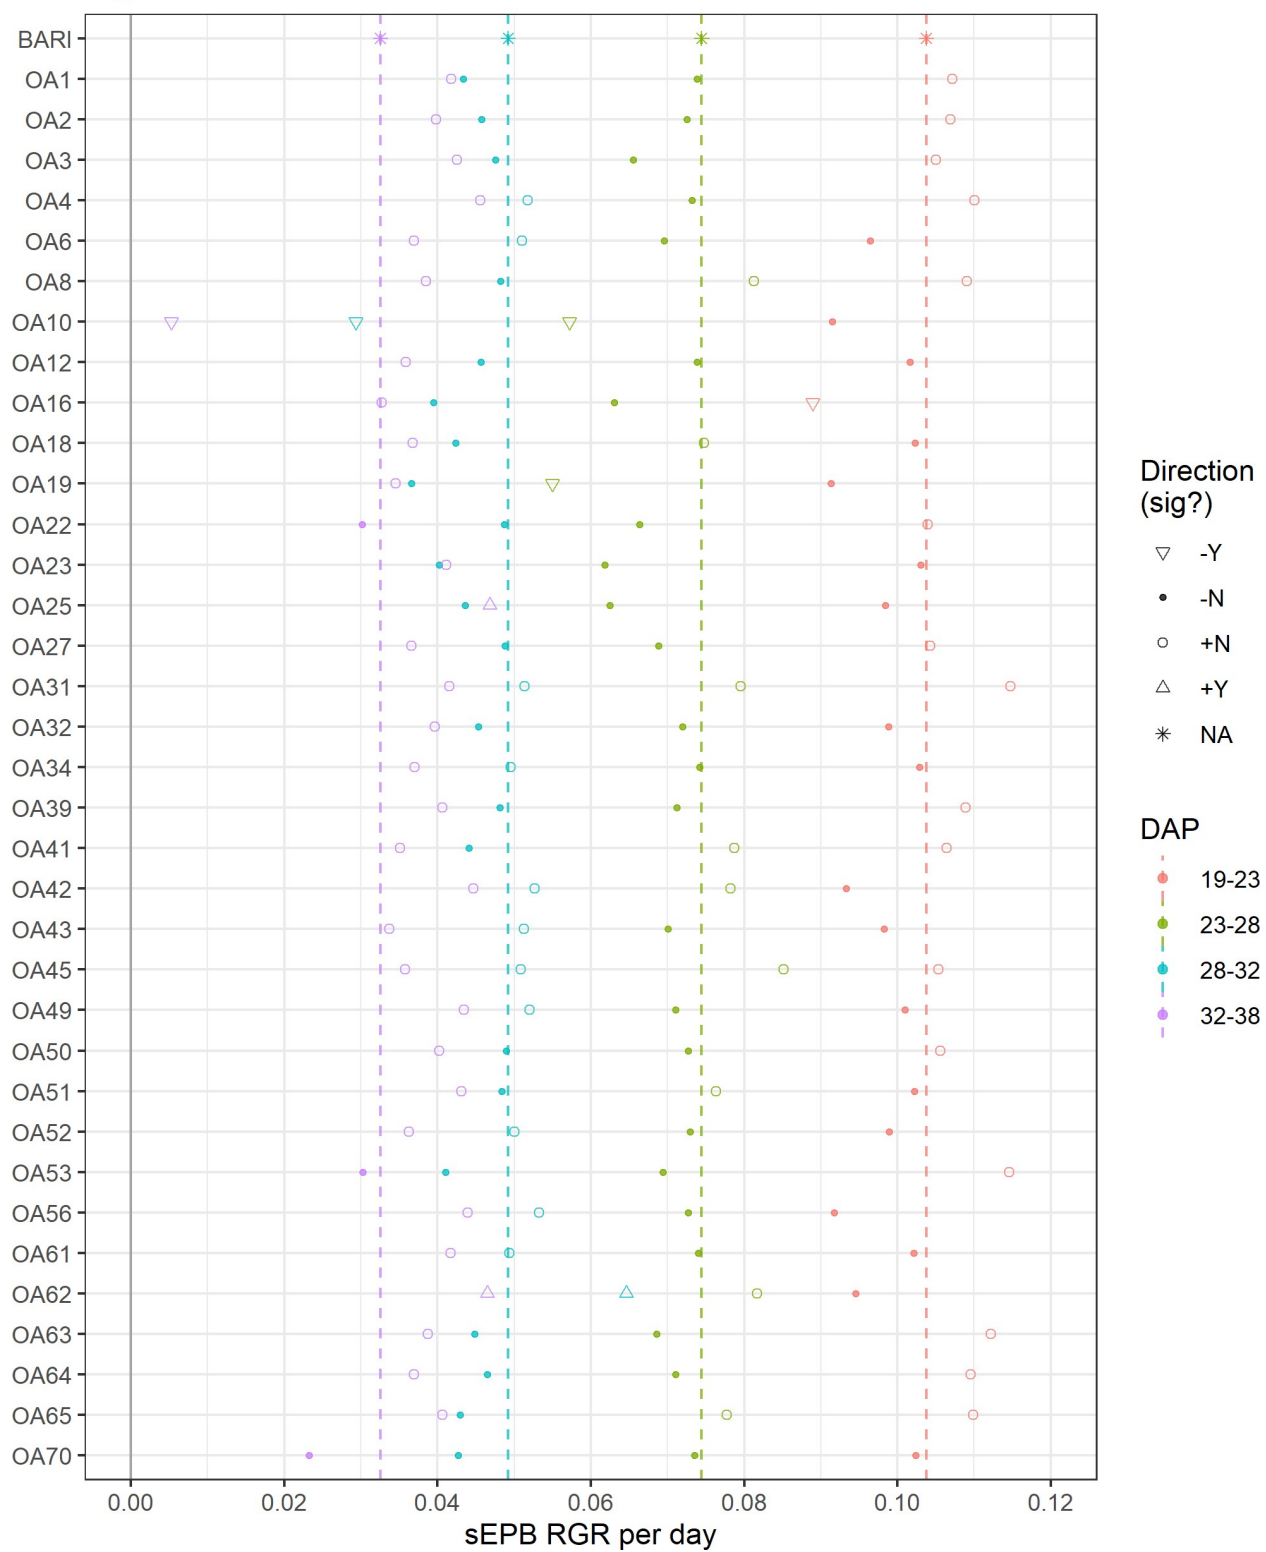

Figure S18.

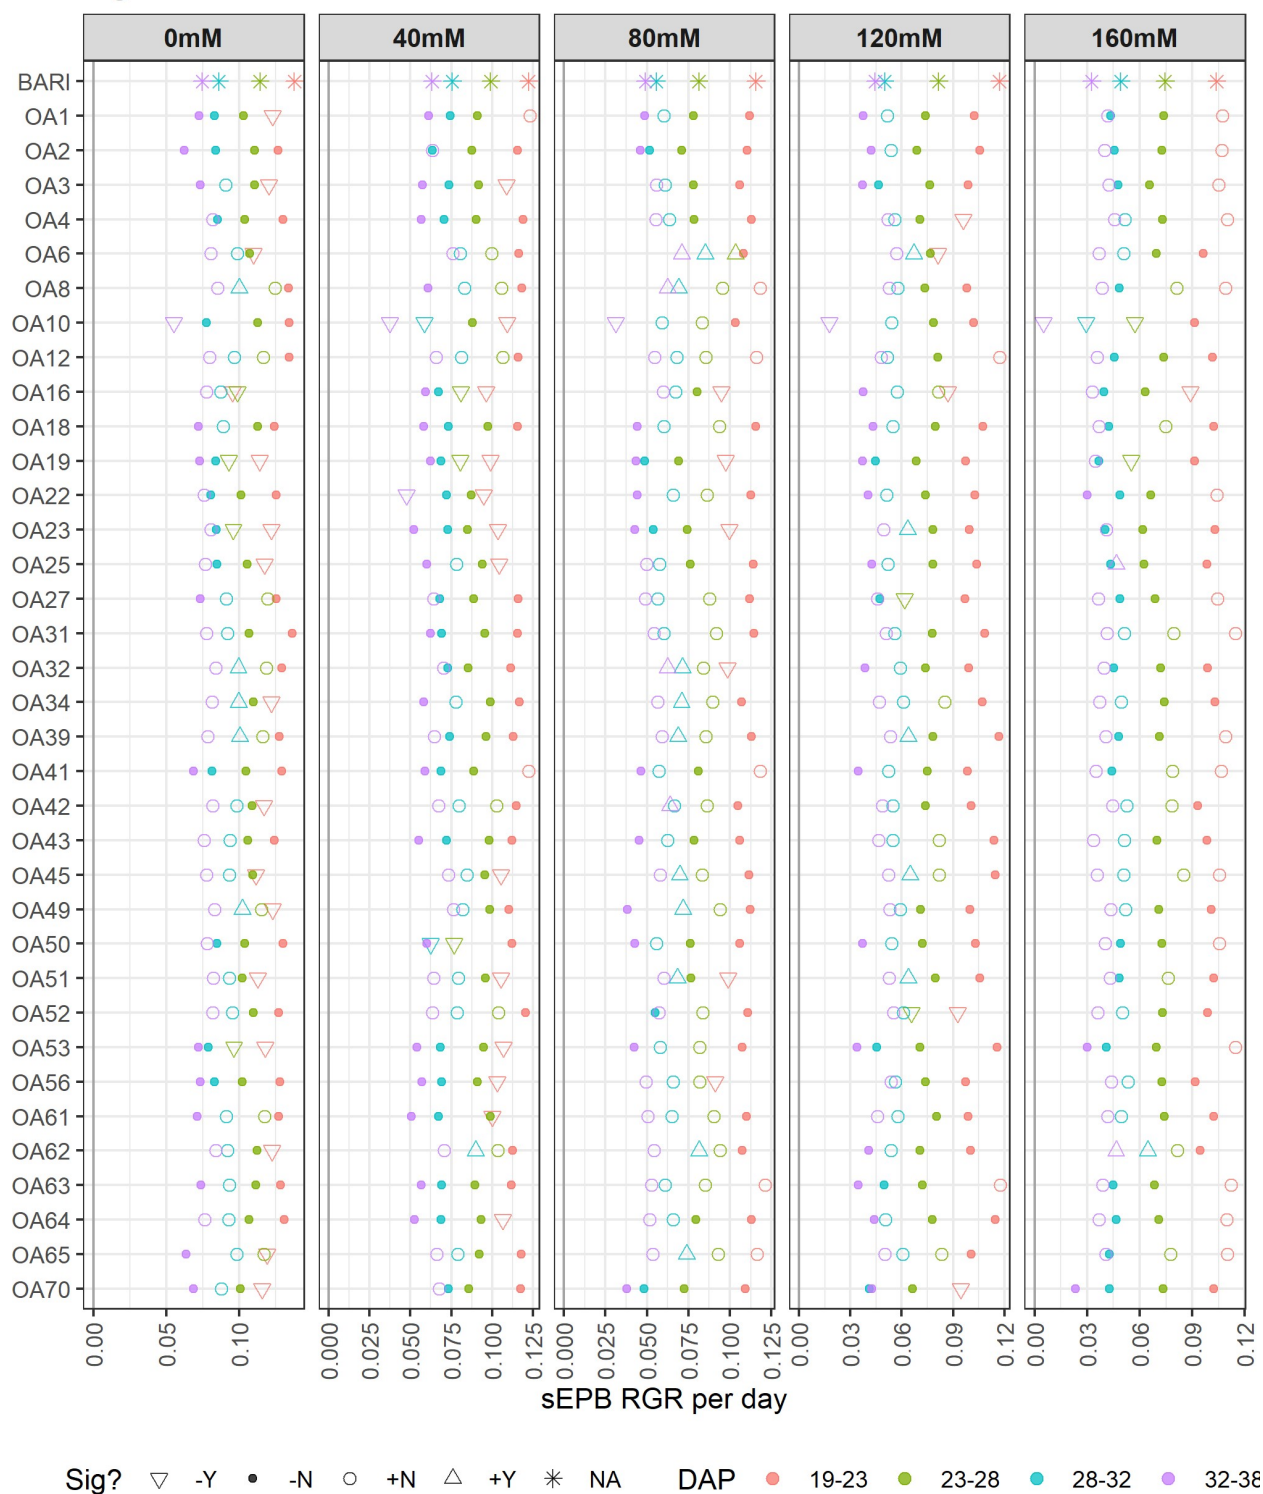

Figure S19.

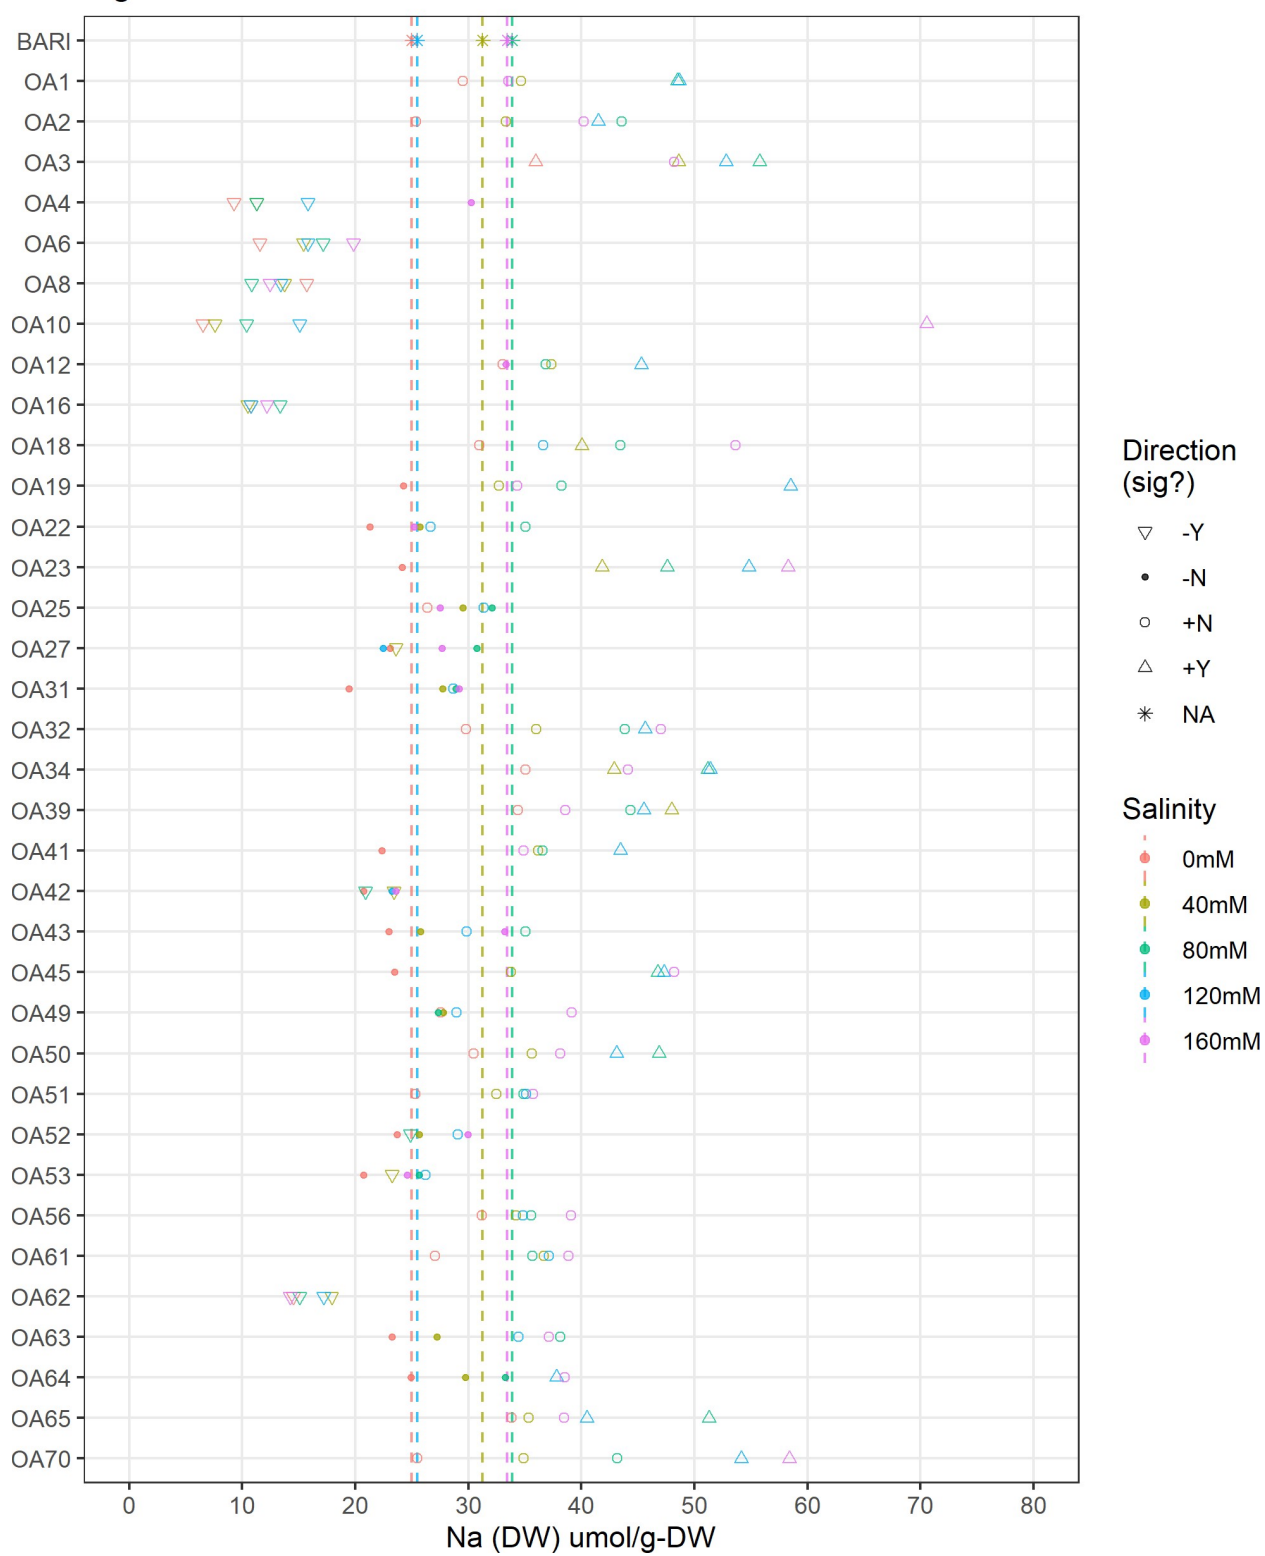

Figure S20.

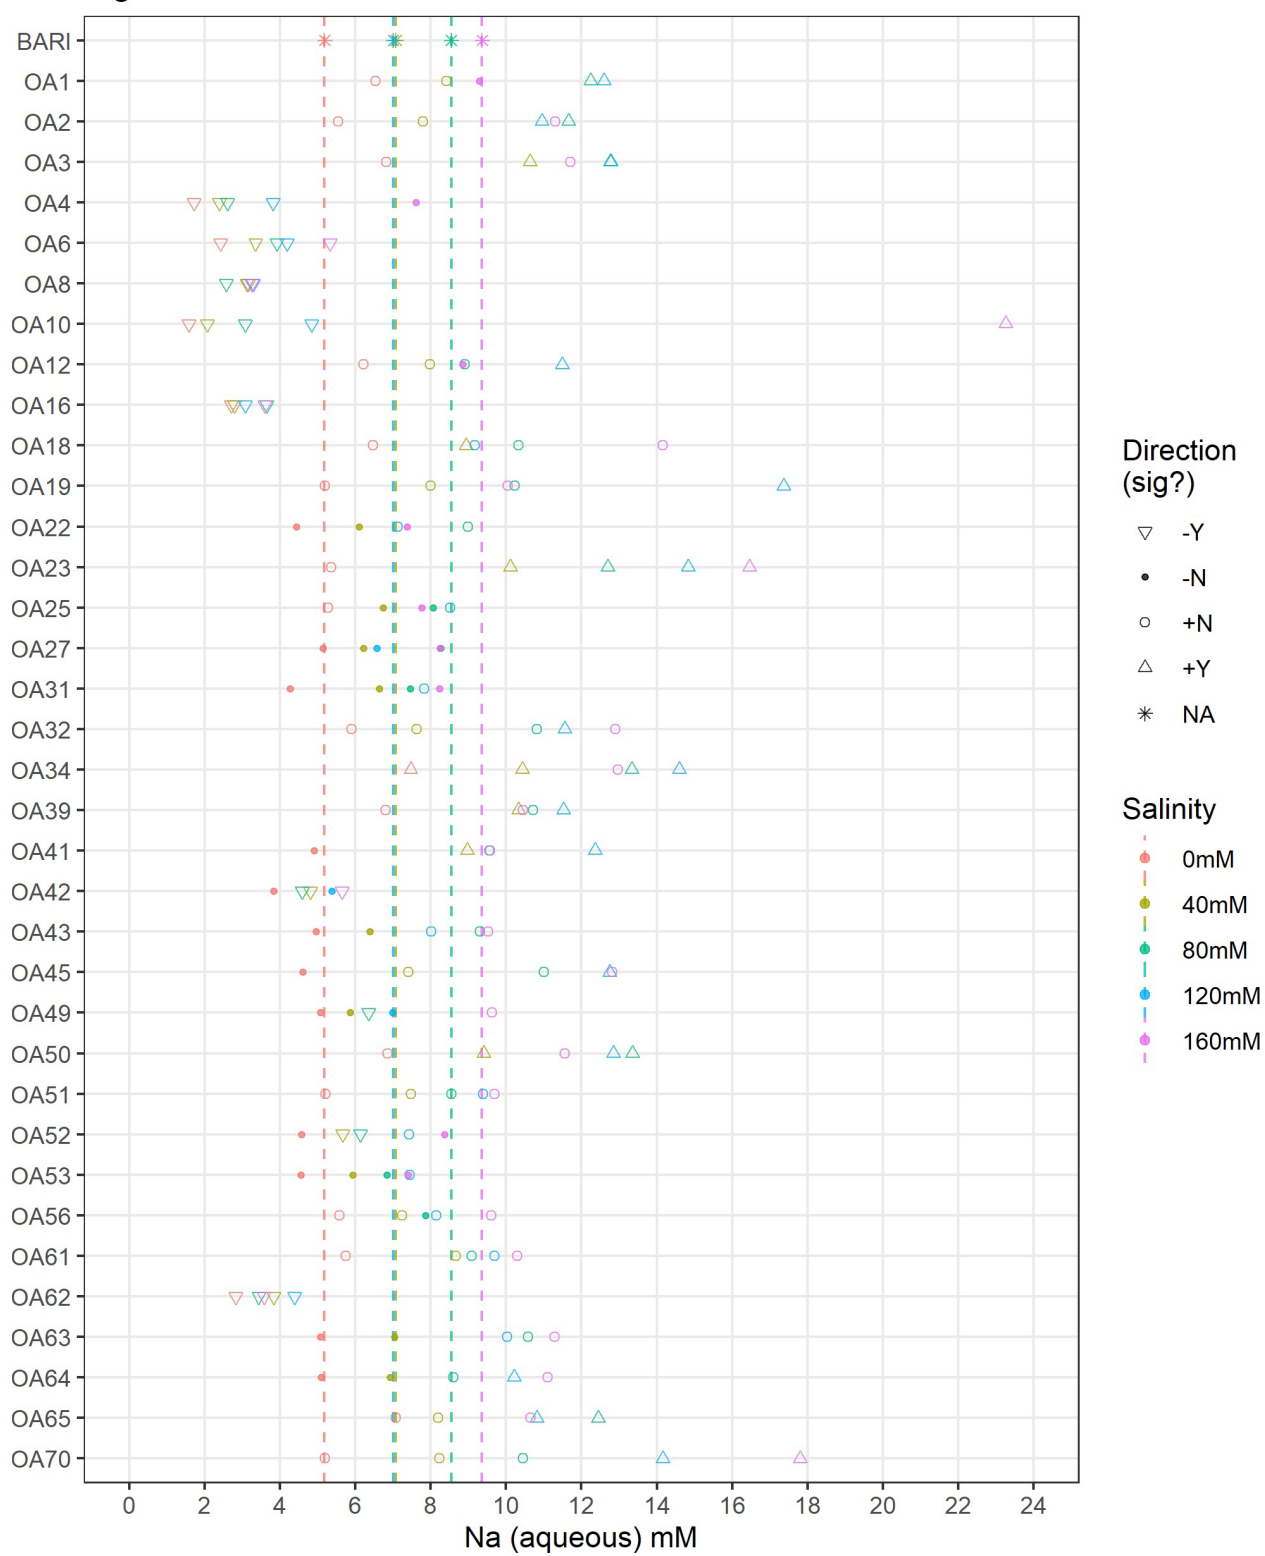

Figure S21.

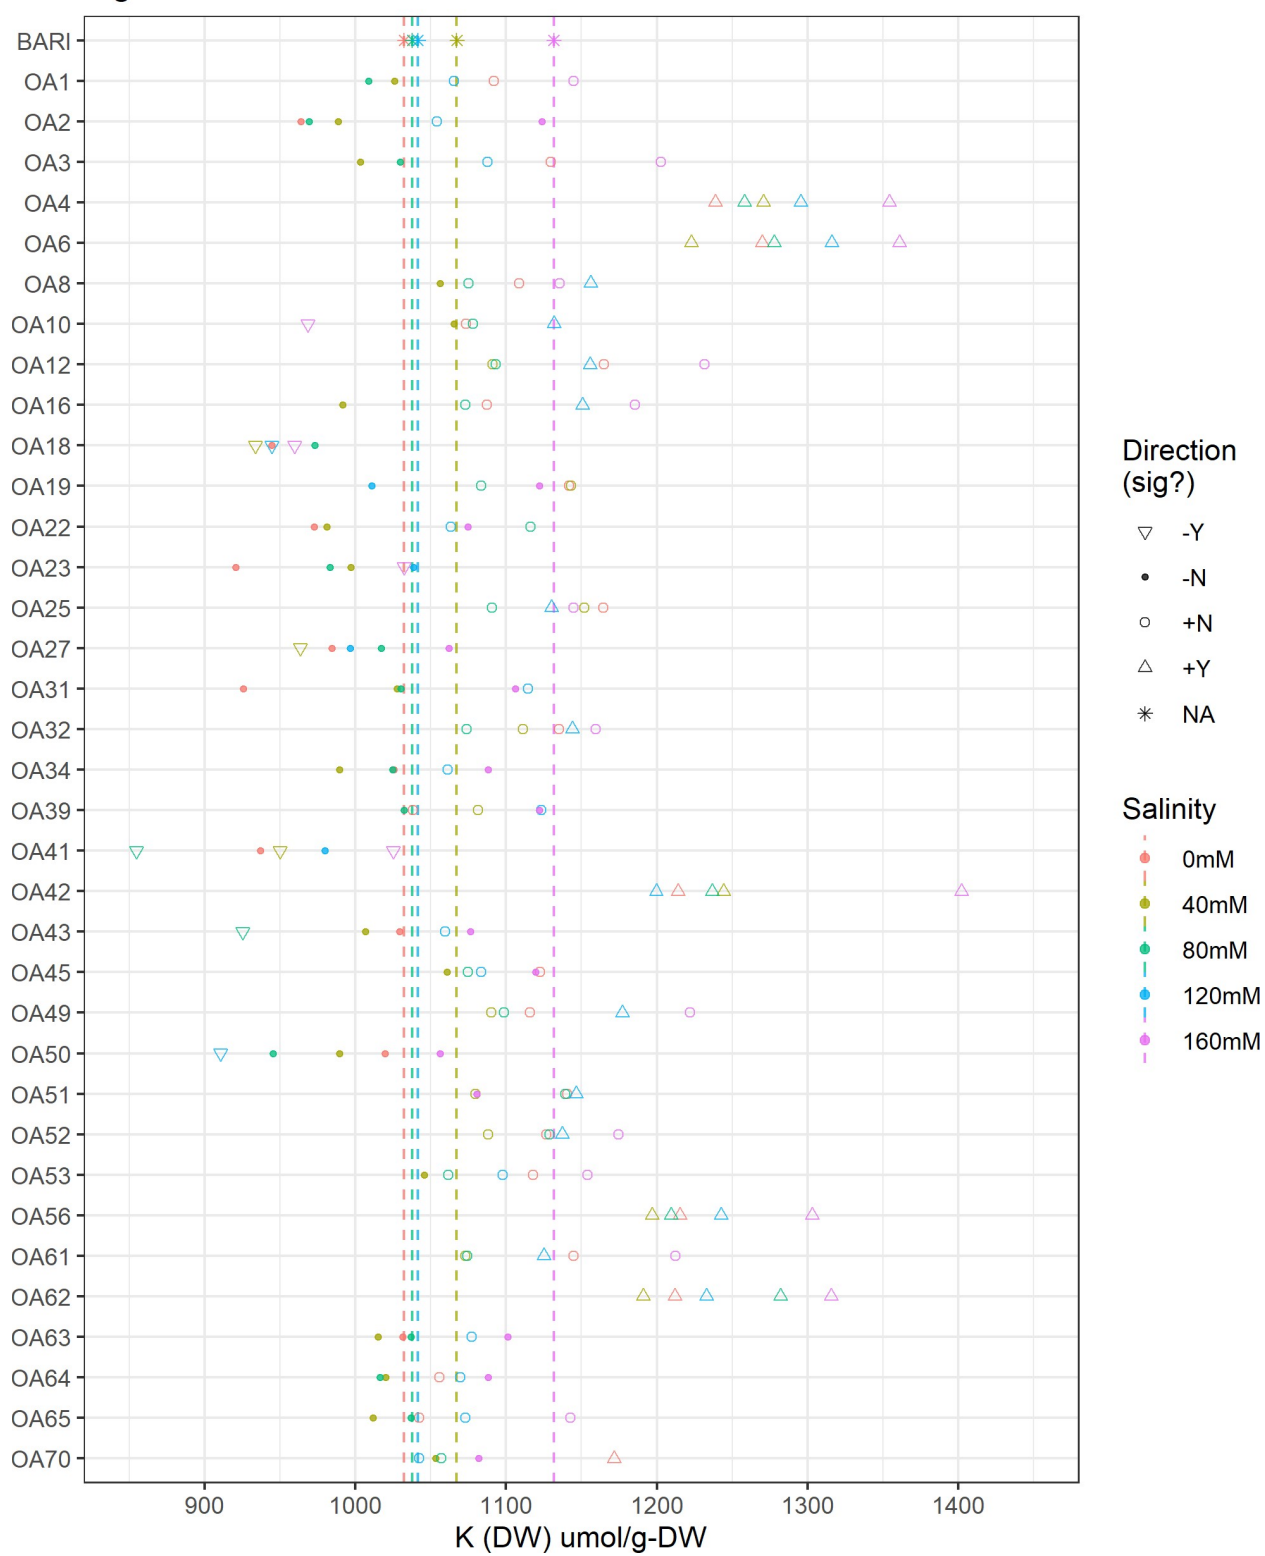

Figure S22.

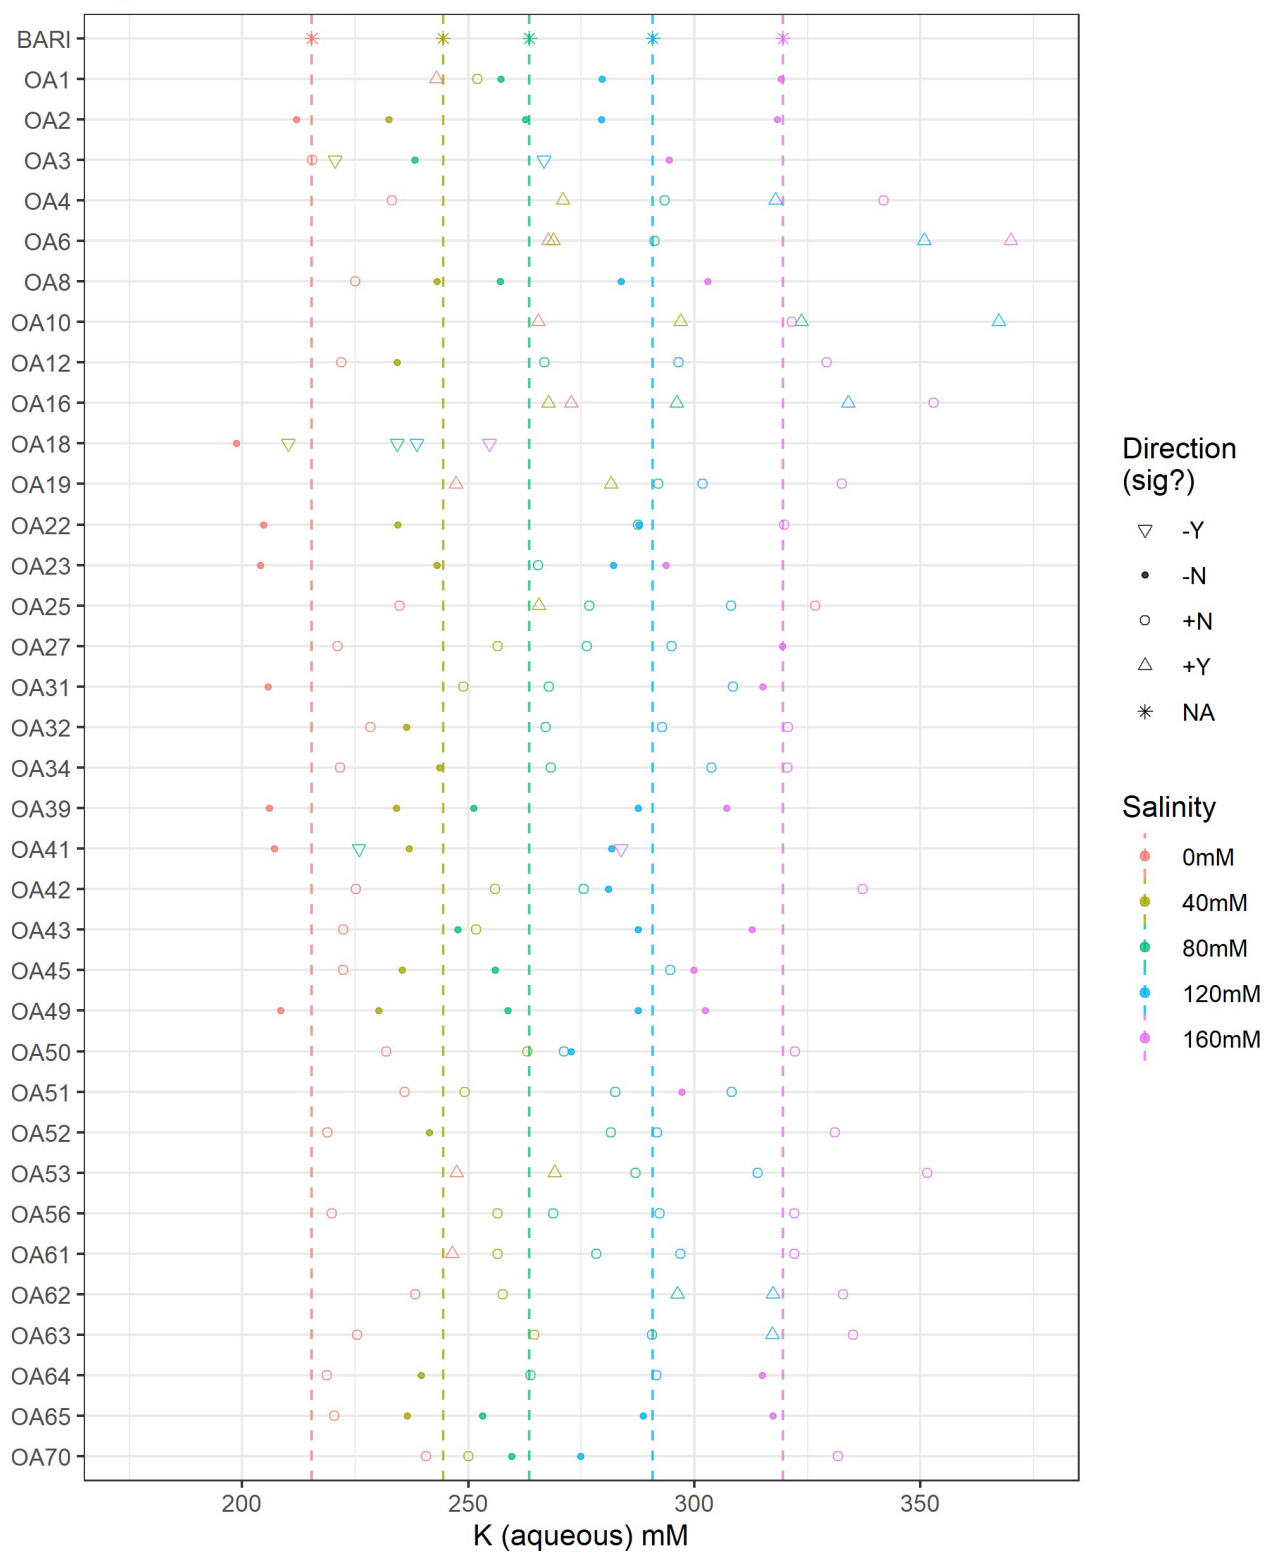

Figure S23.

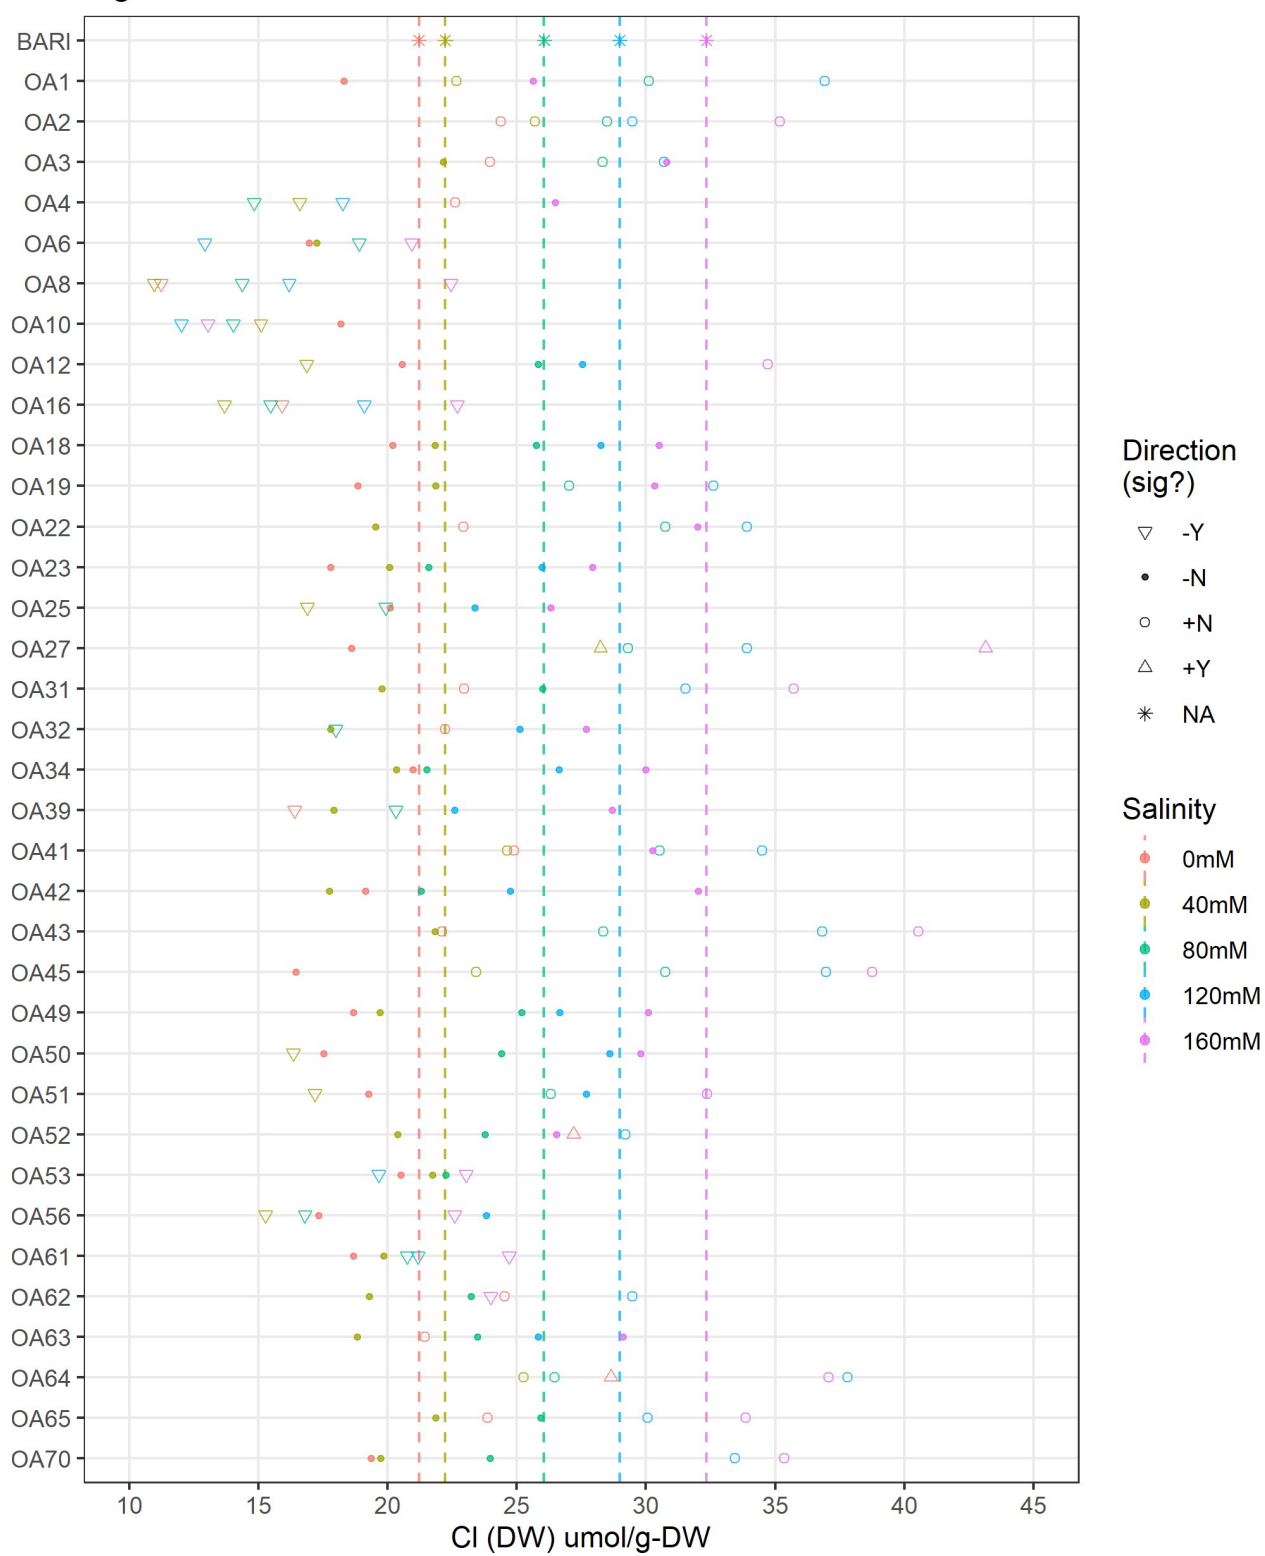

Figure S24.

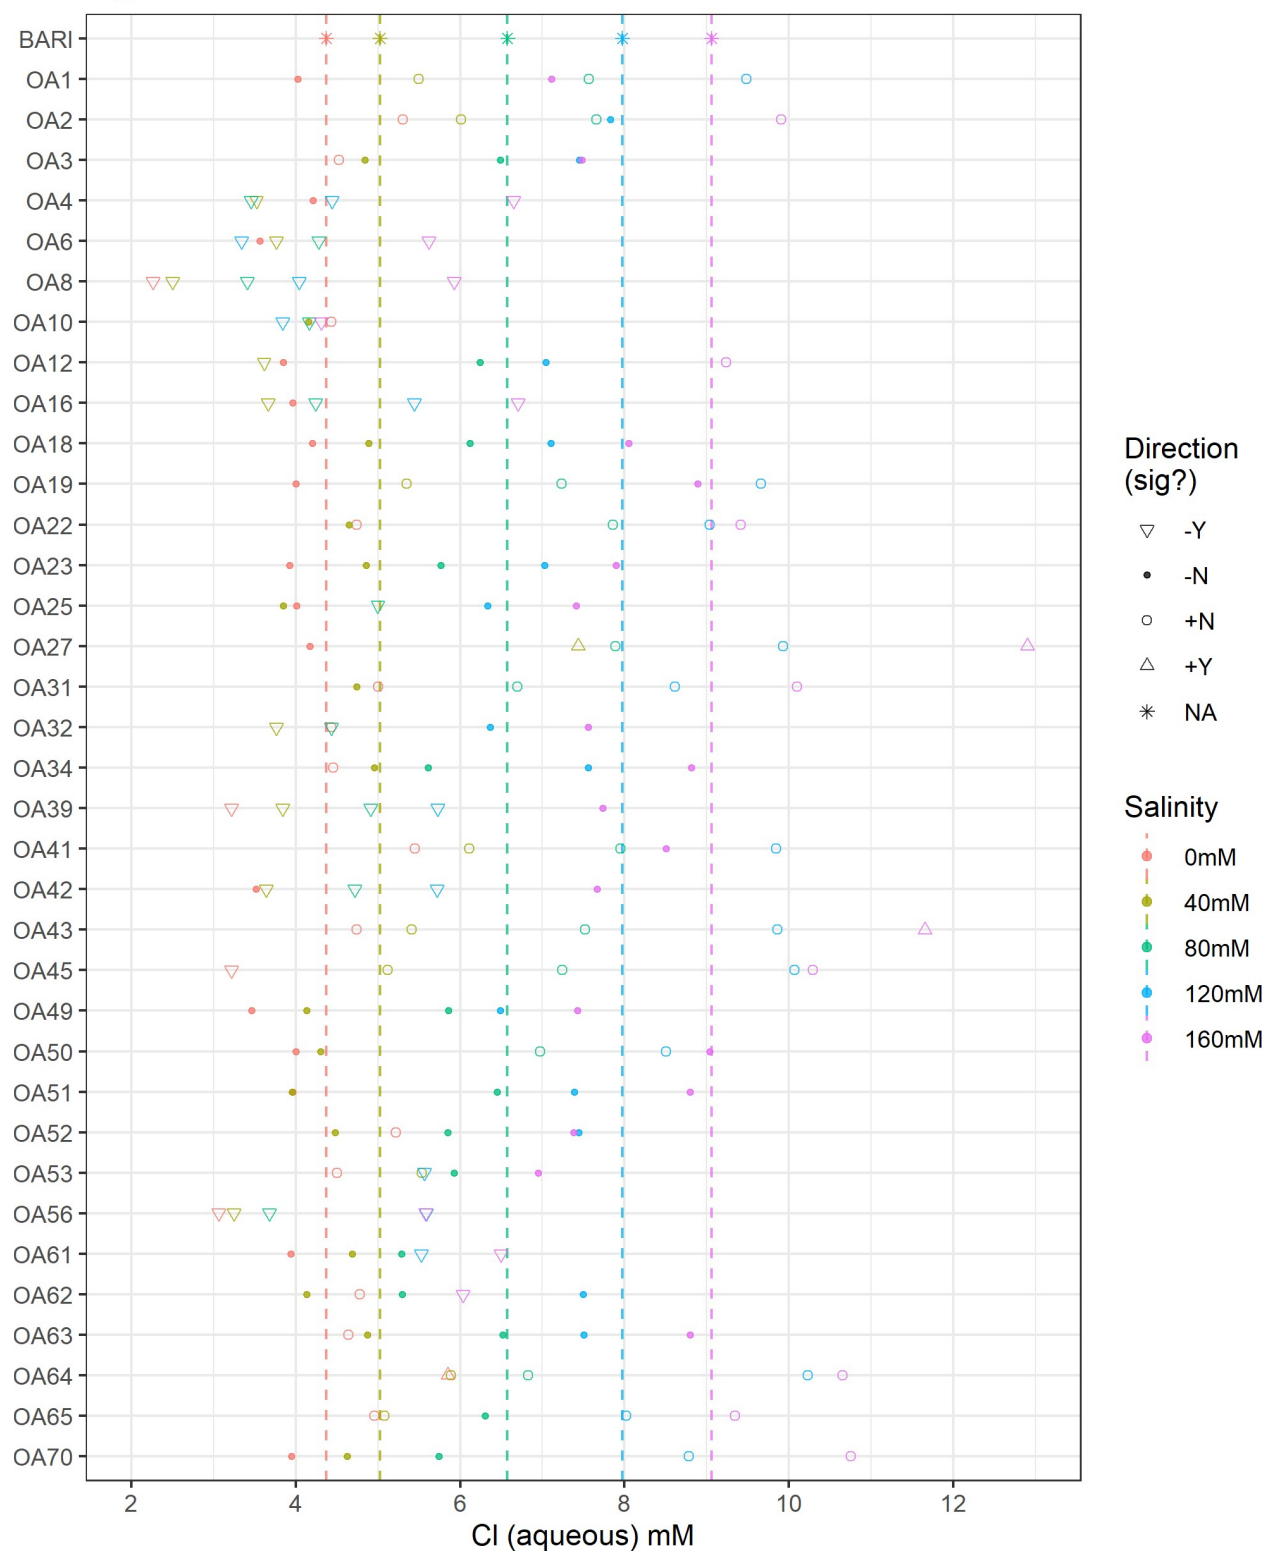

Figure S25.

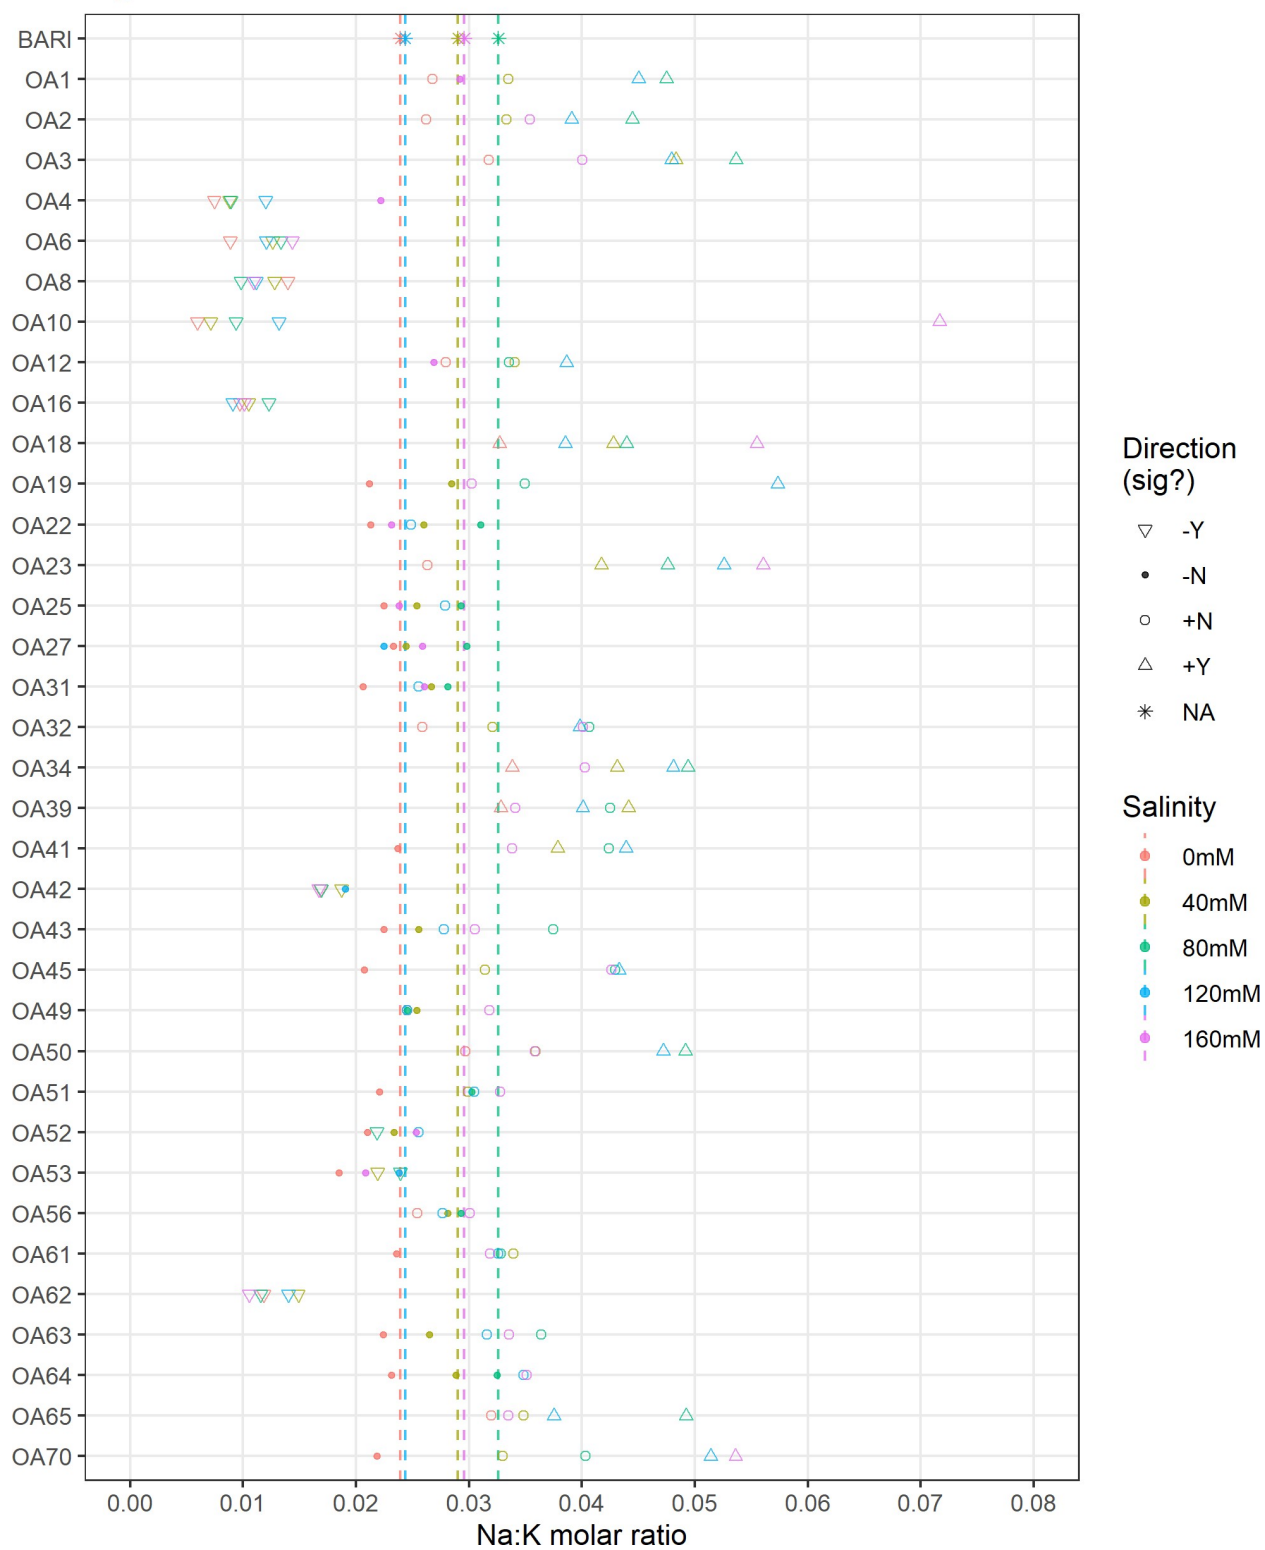

Figure S26.

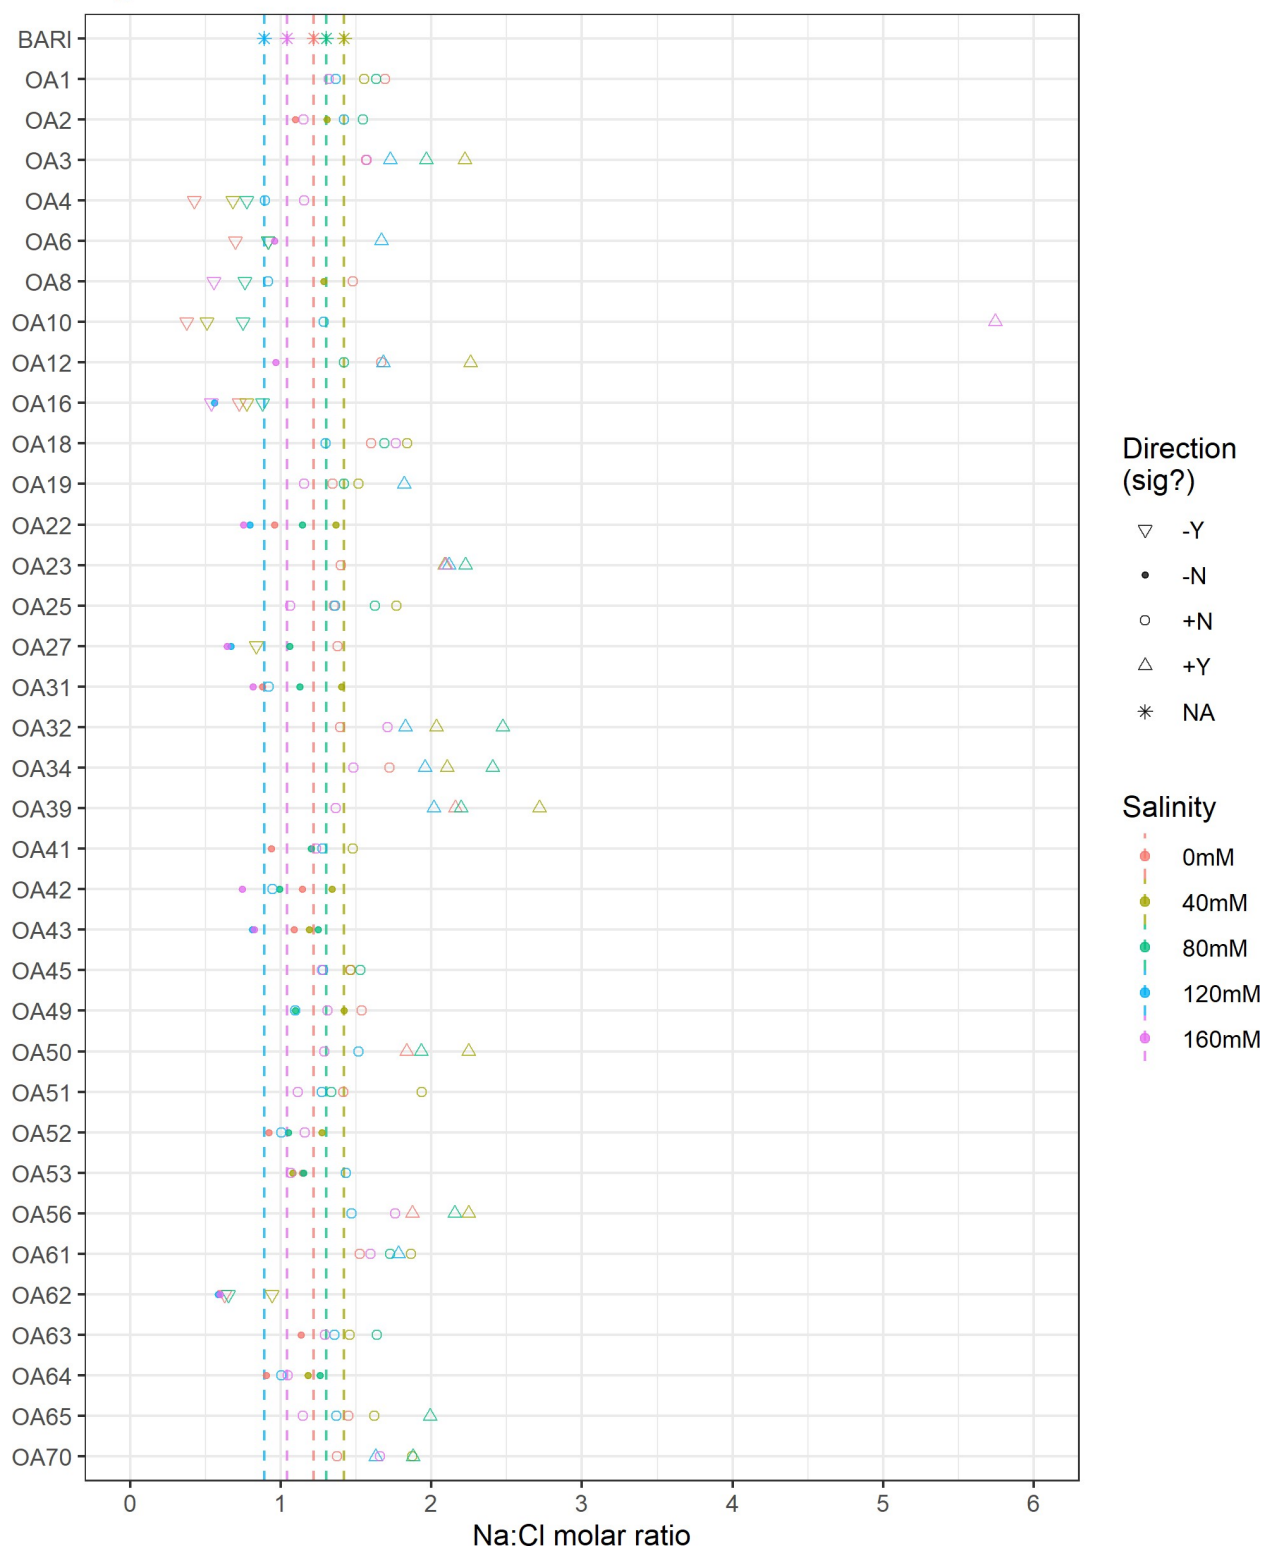

Figure S27.

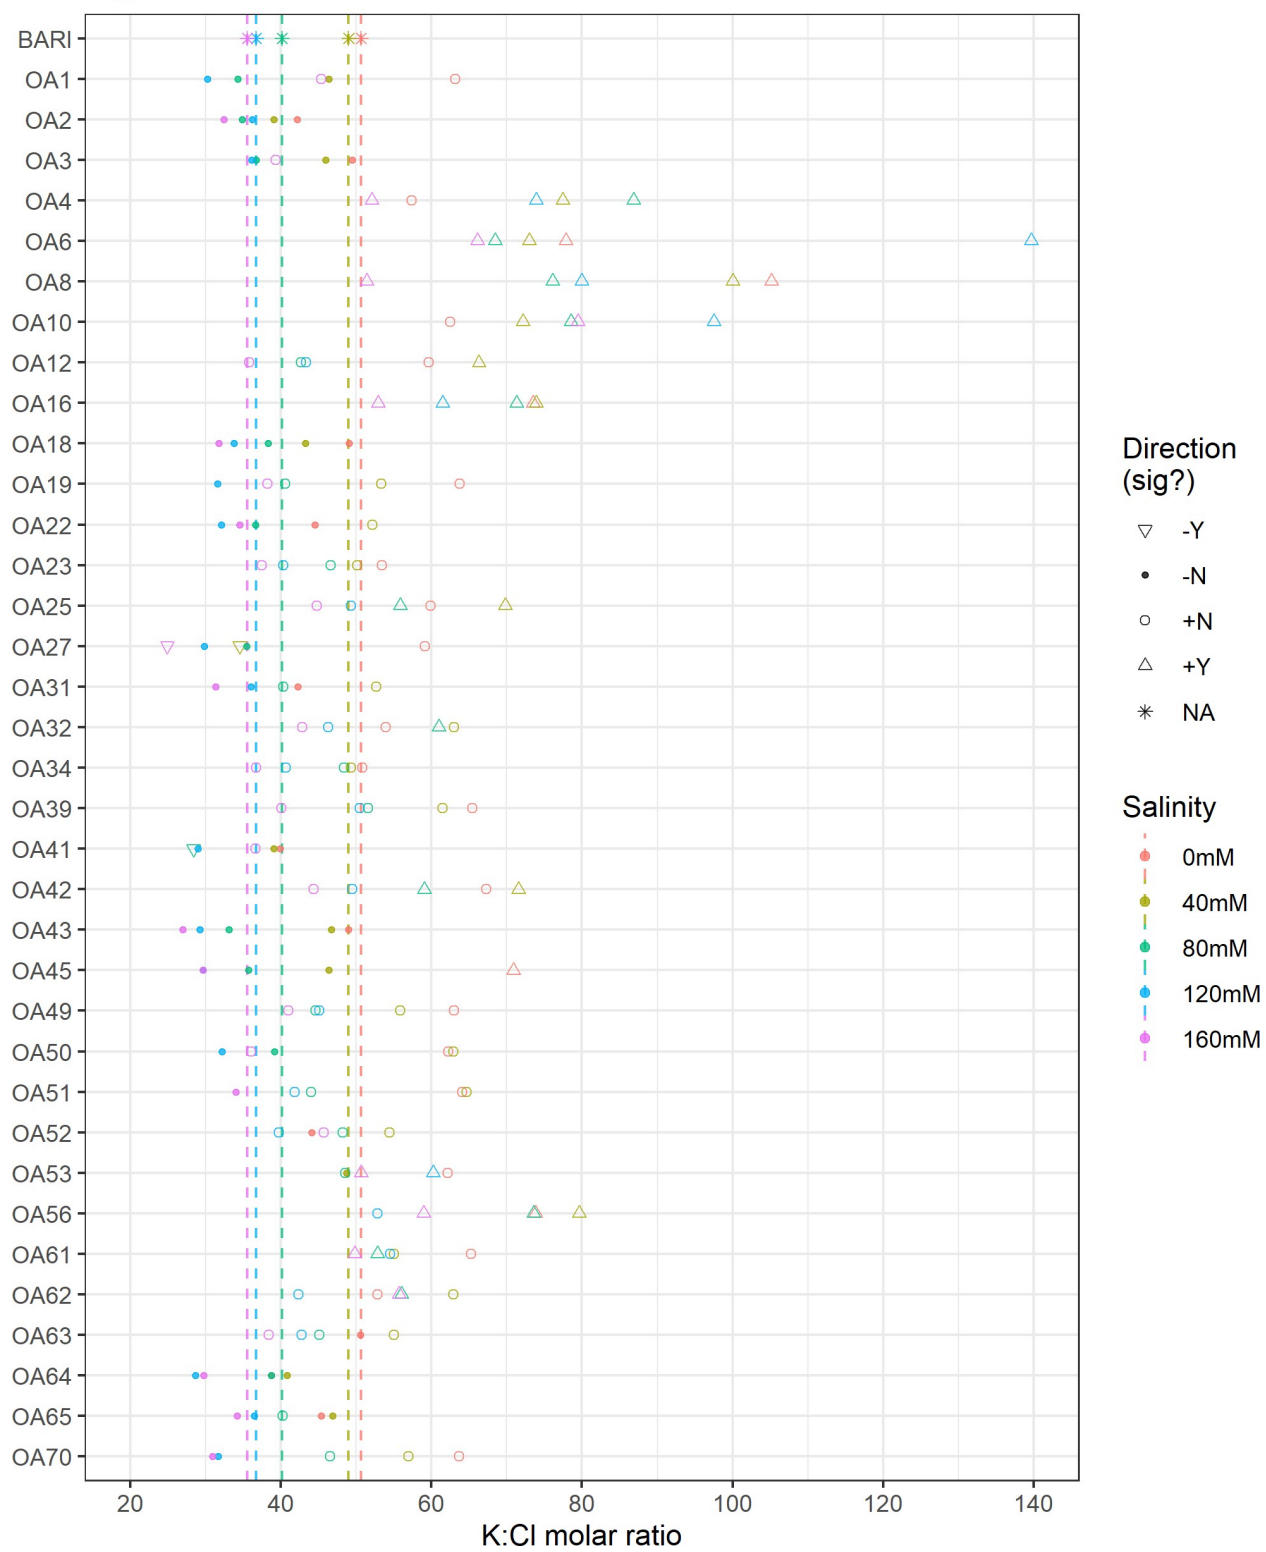

Figure S28.

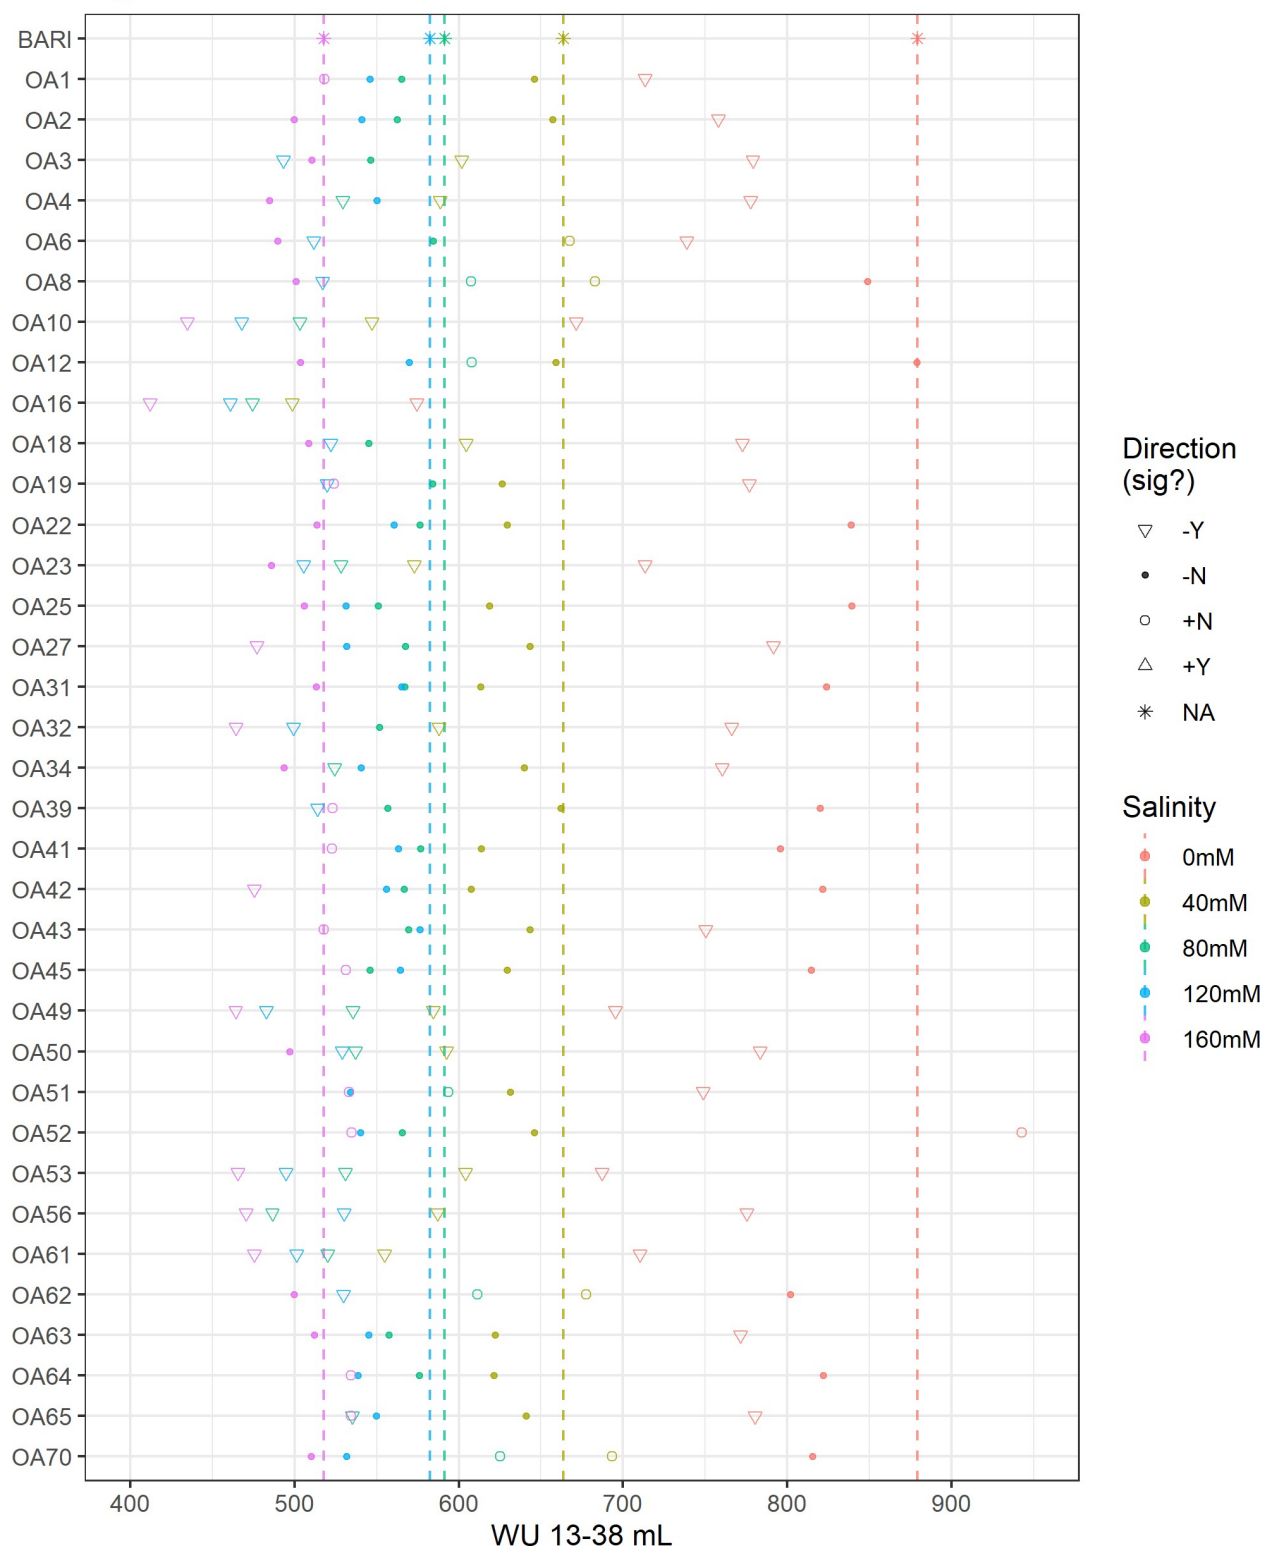

Figure S29.

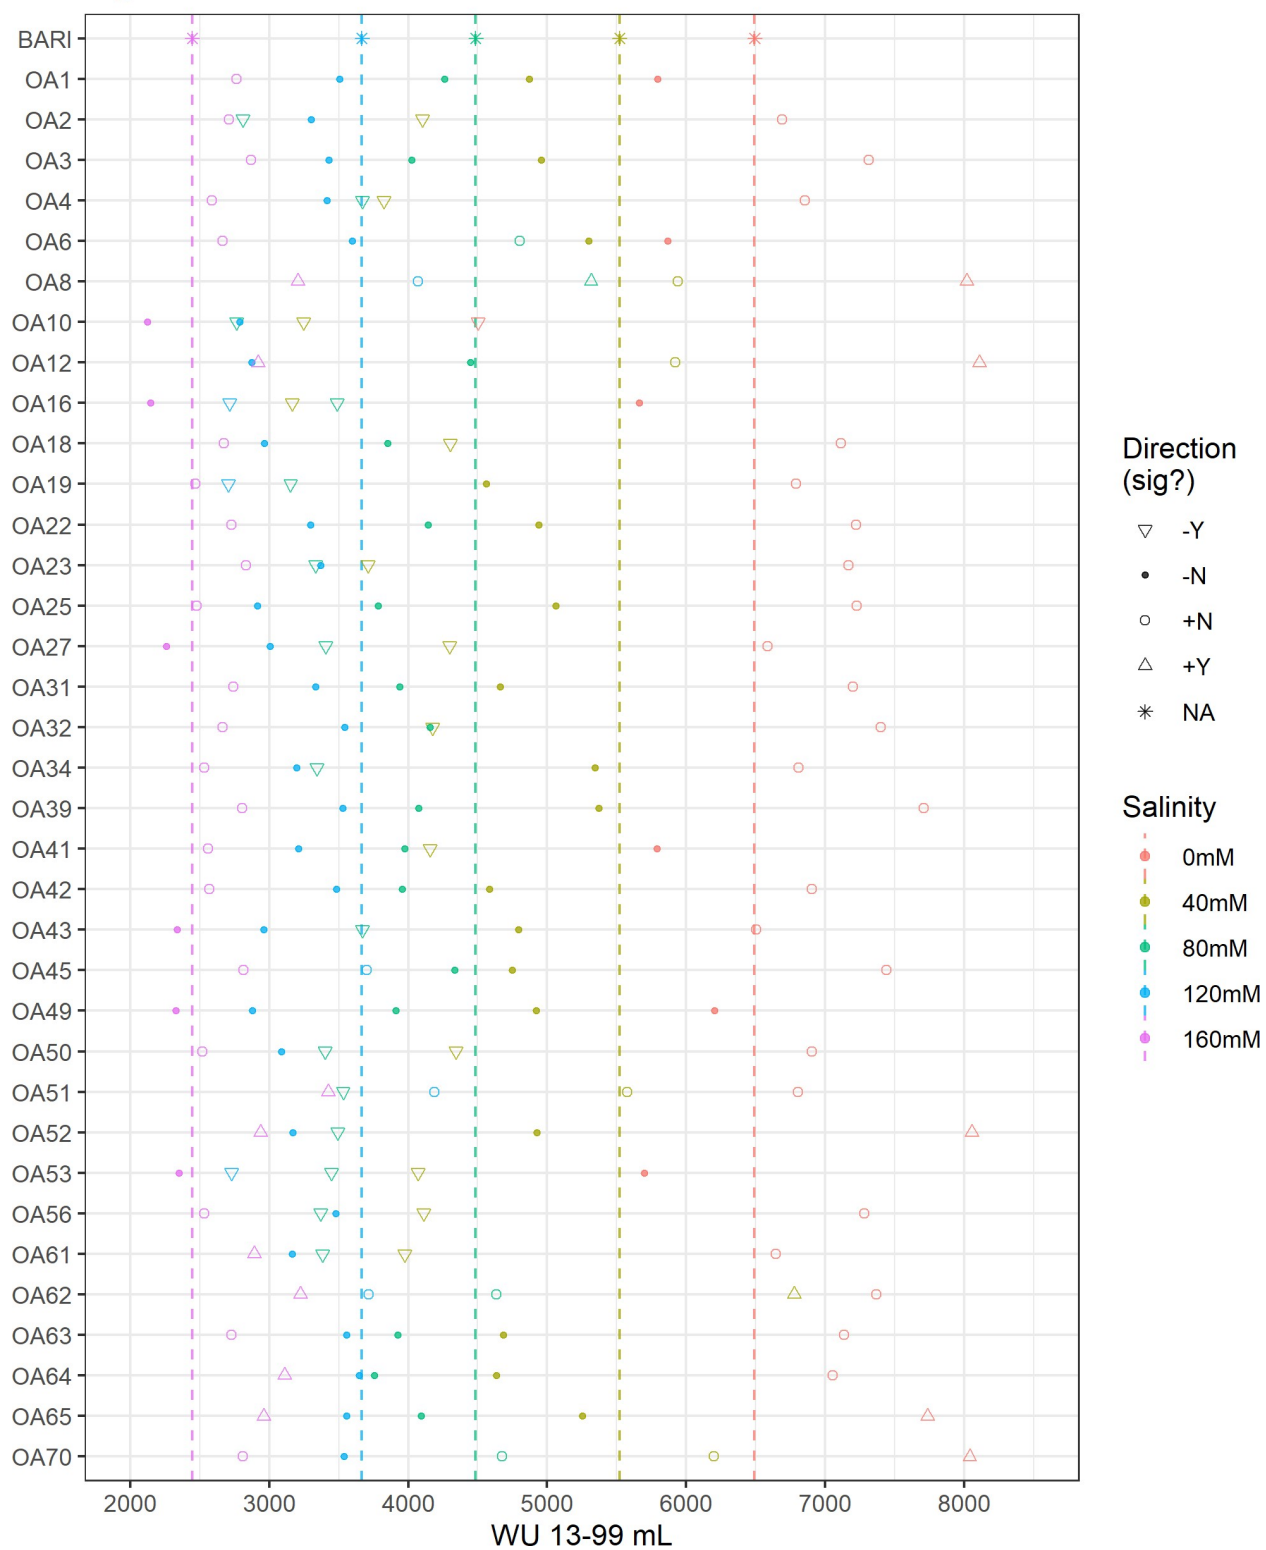

Figure S30. NaCl 0mM

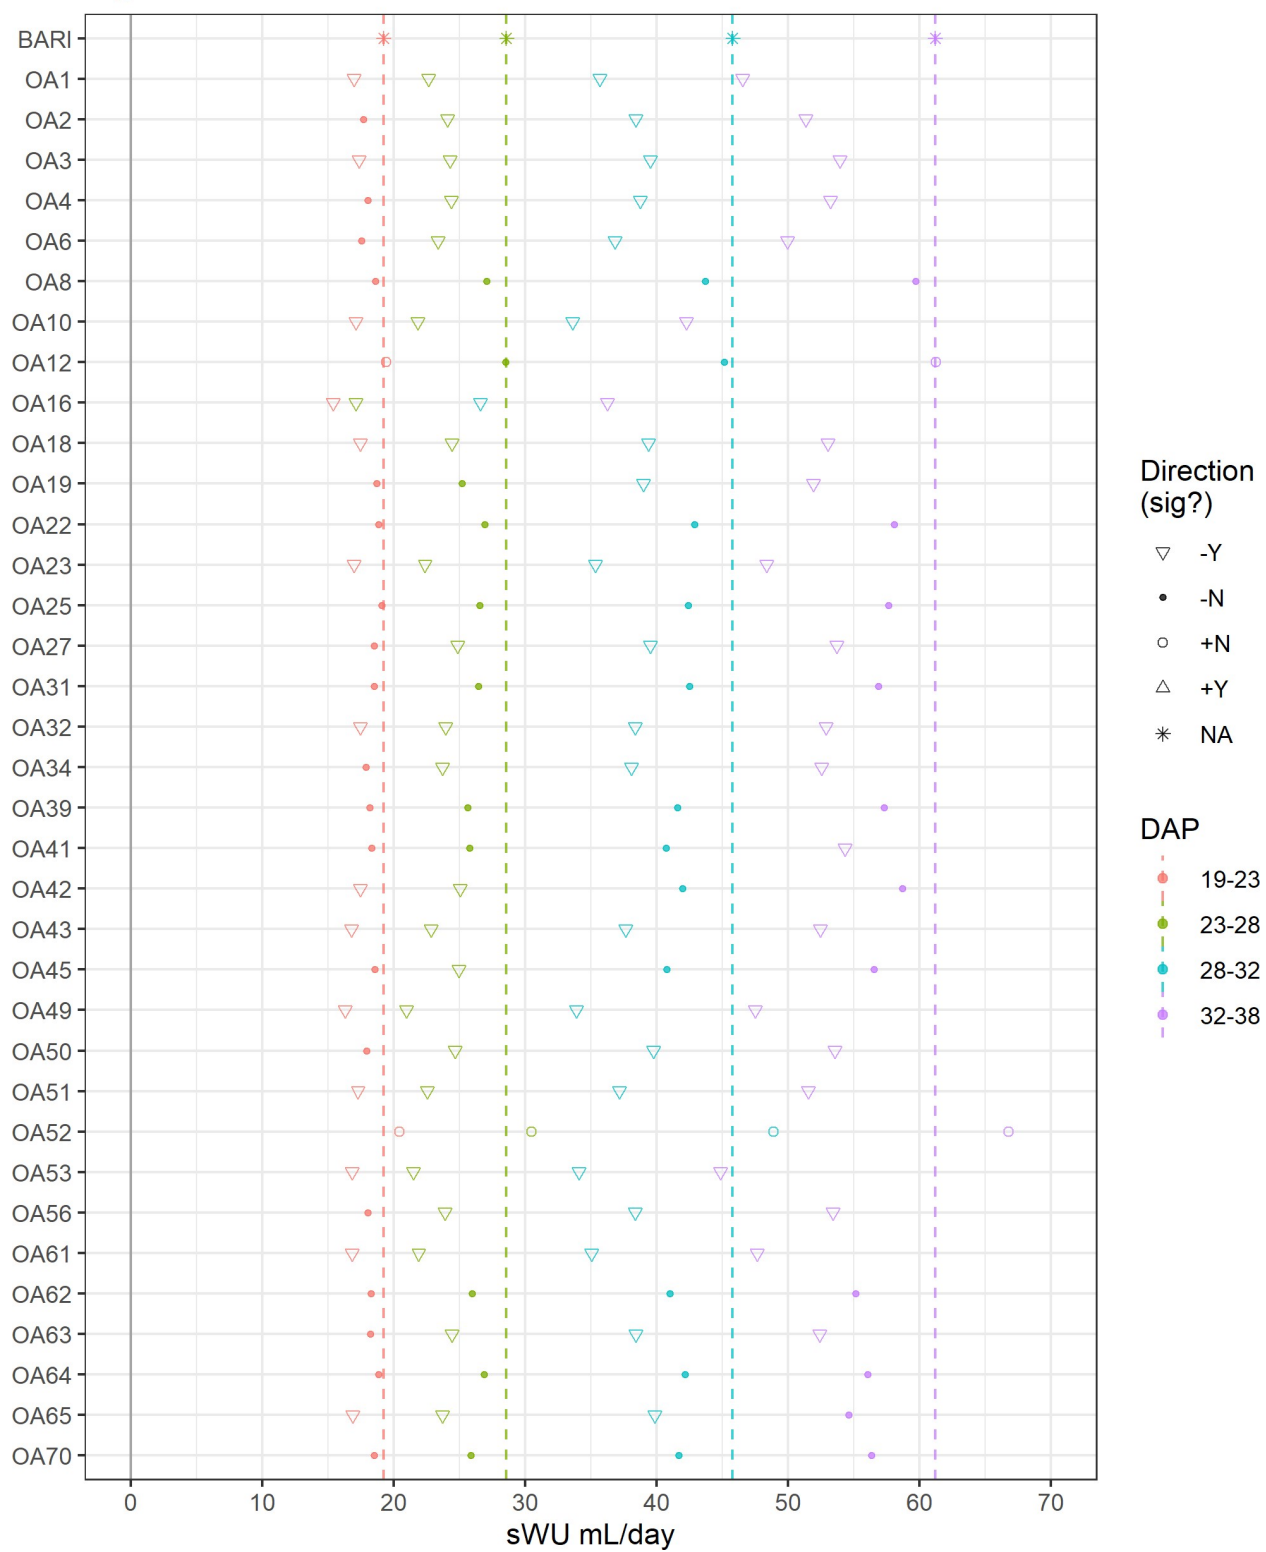

Figure S31. NaCl 40mM

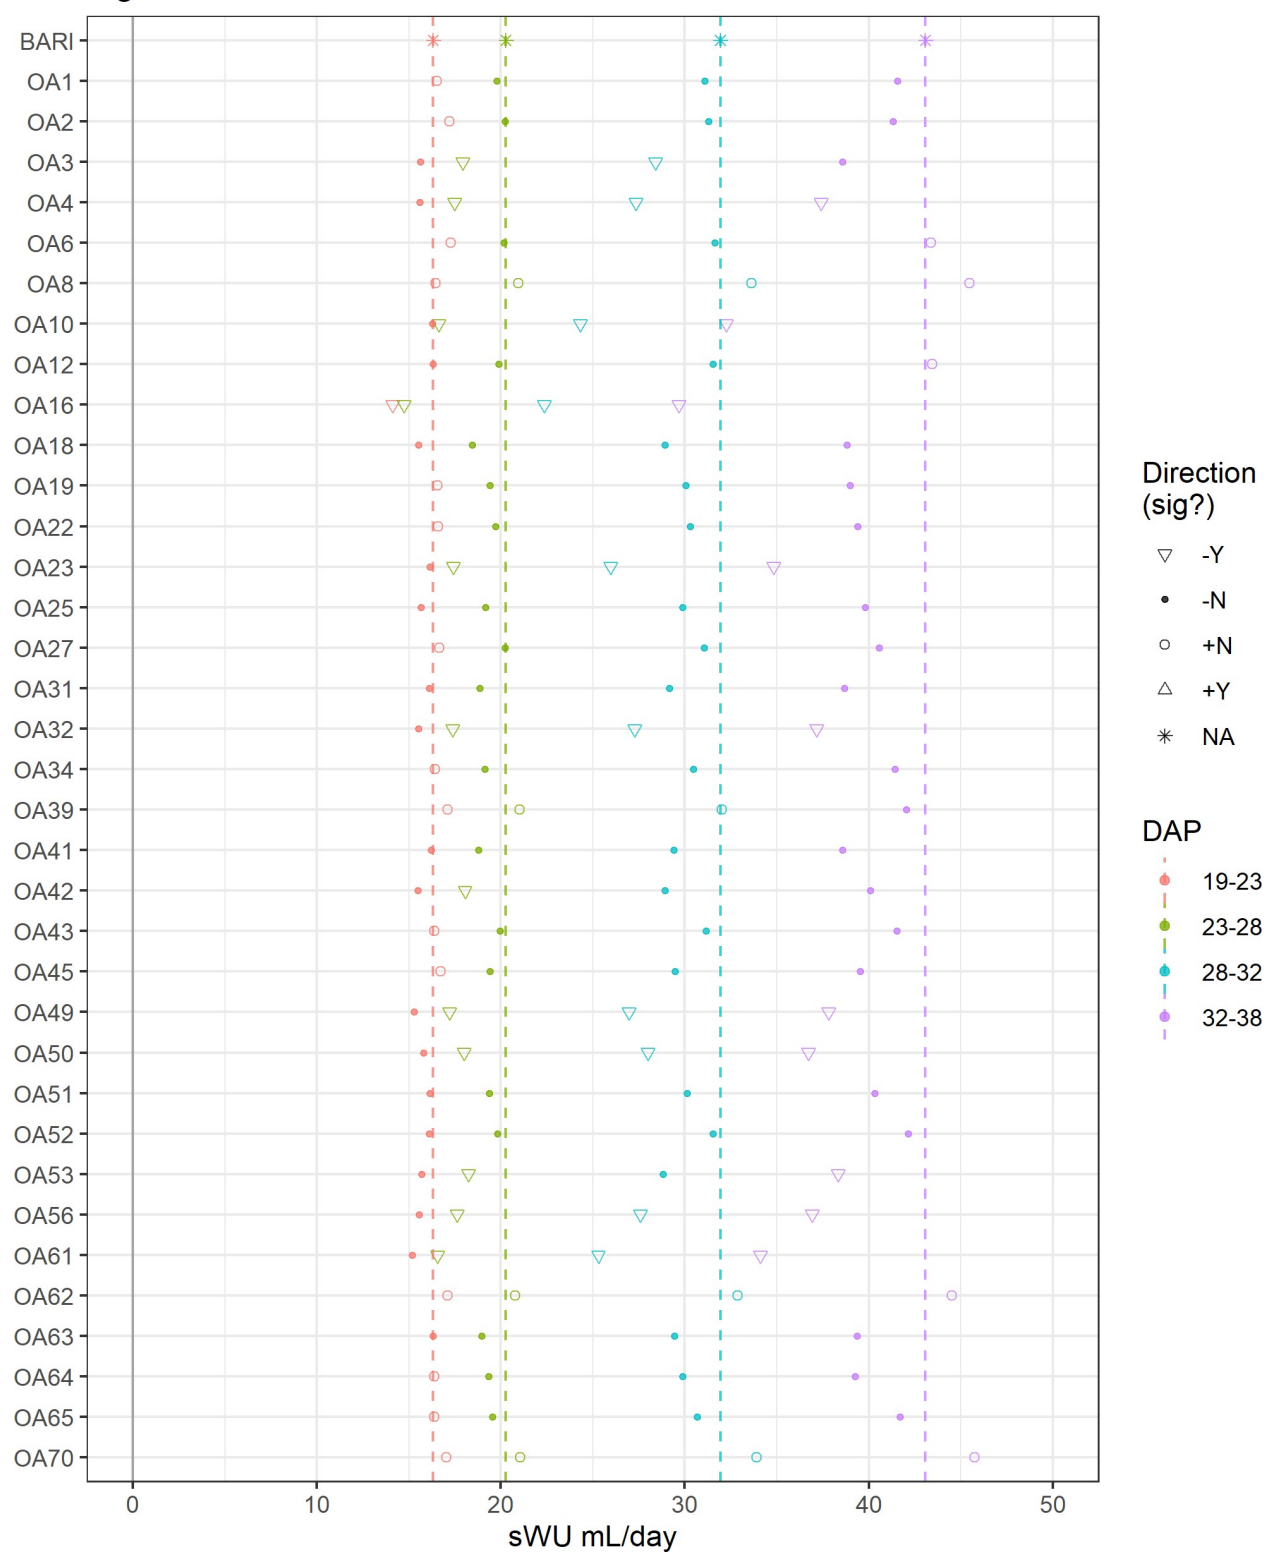

Figure S32. NaCl 80mM

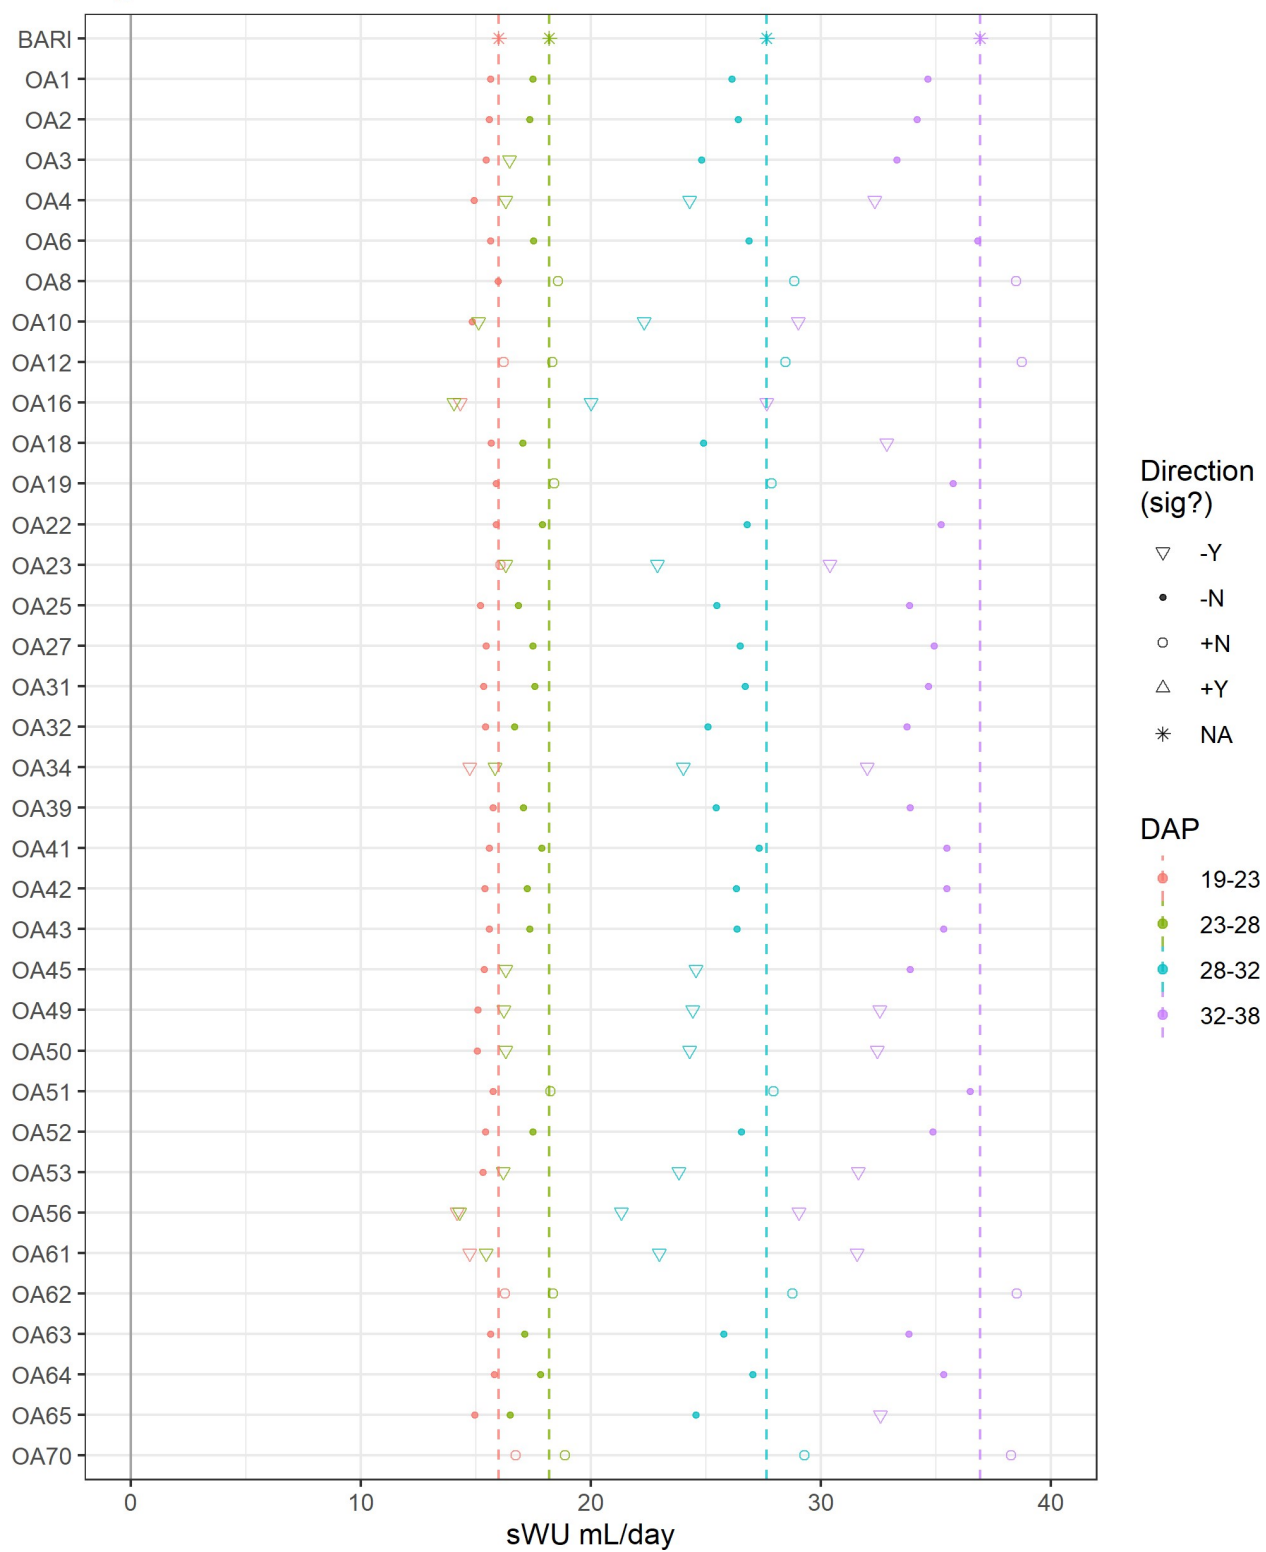

Figure S33. NaCl 120mM

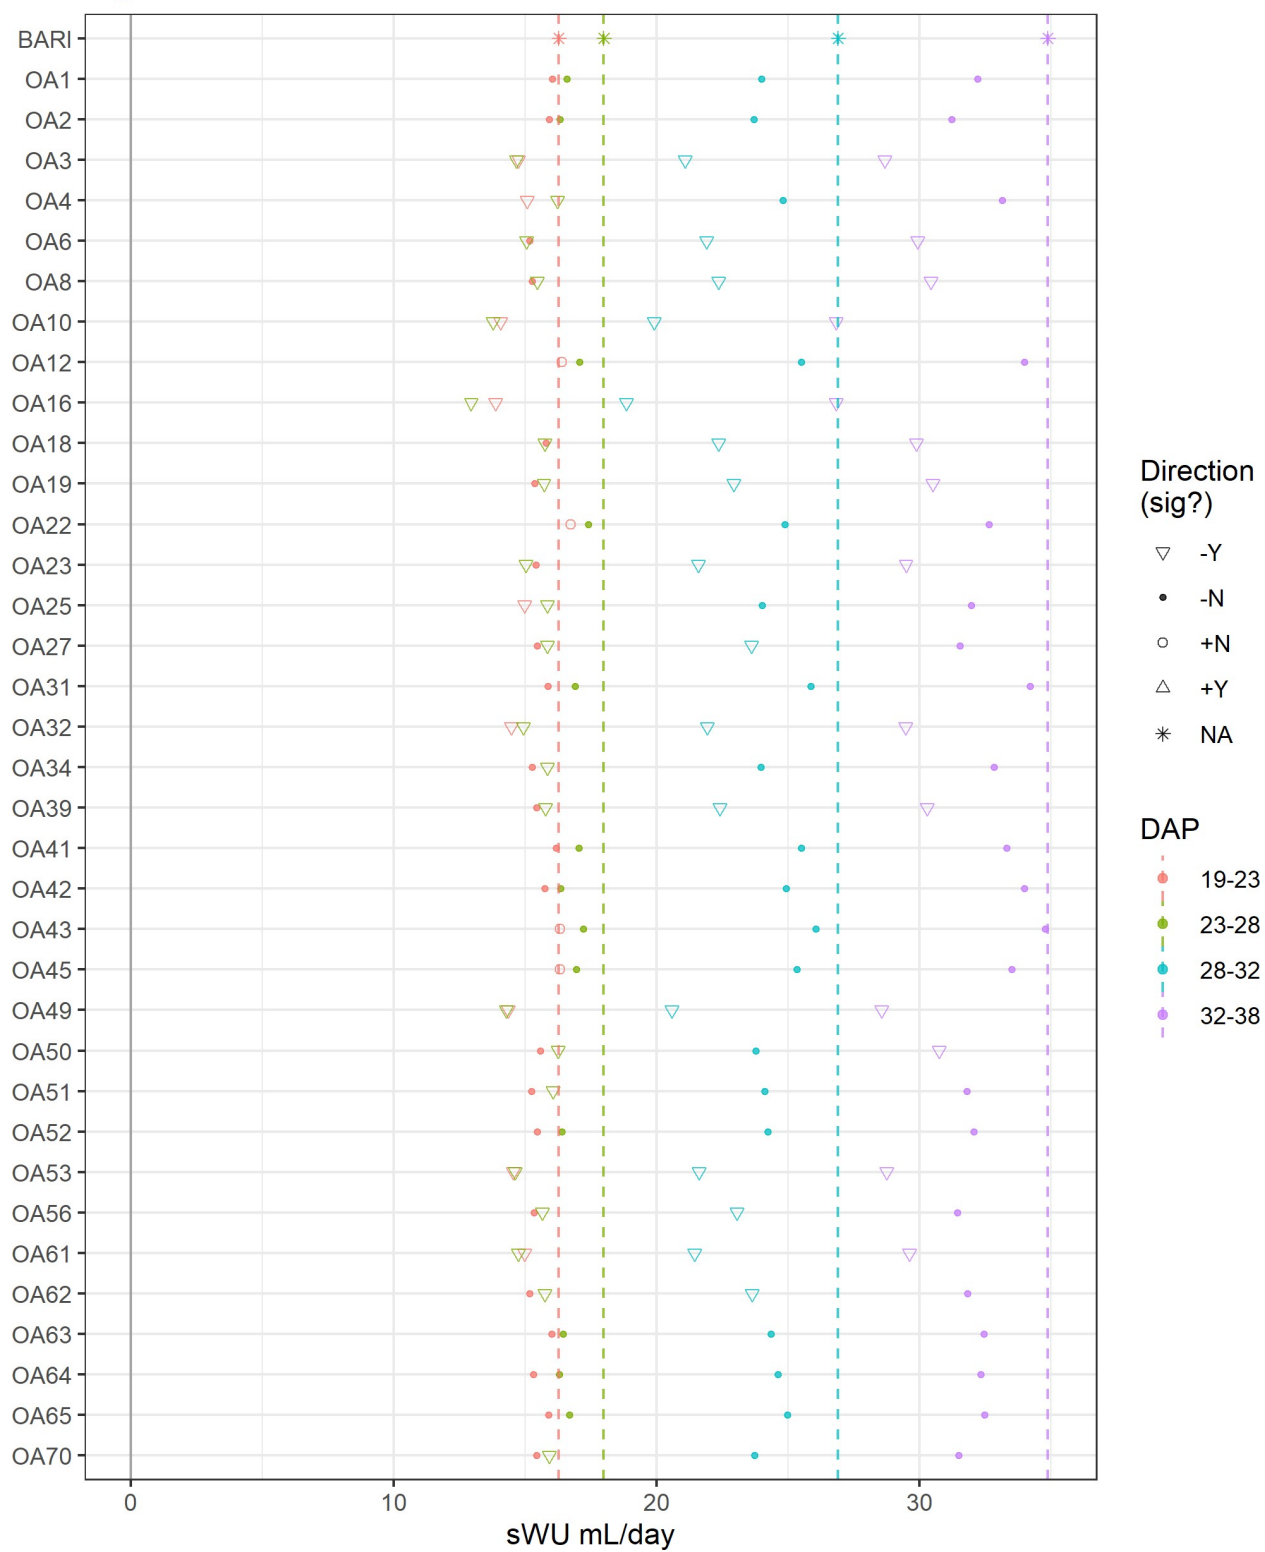

Figure S34. NaCl 160mM

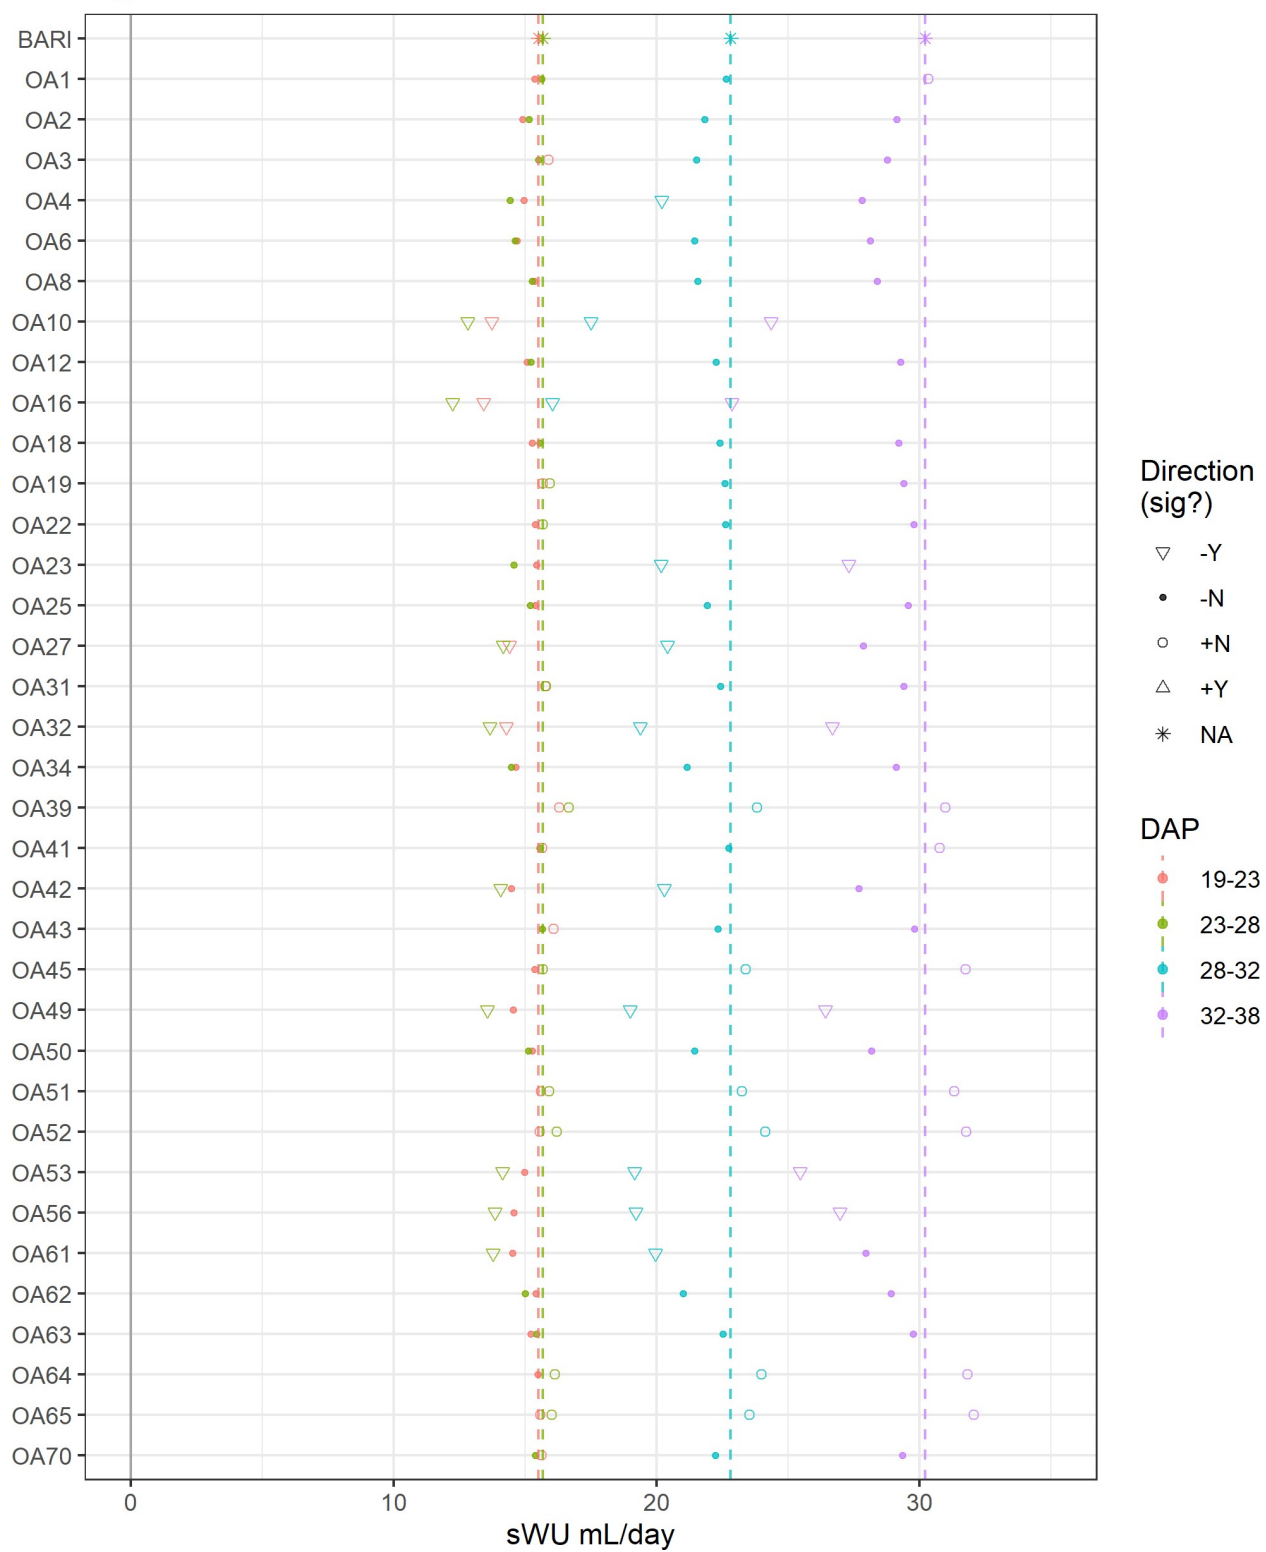

Figure S35.

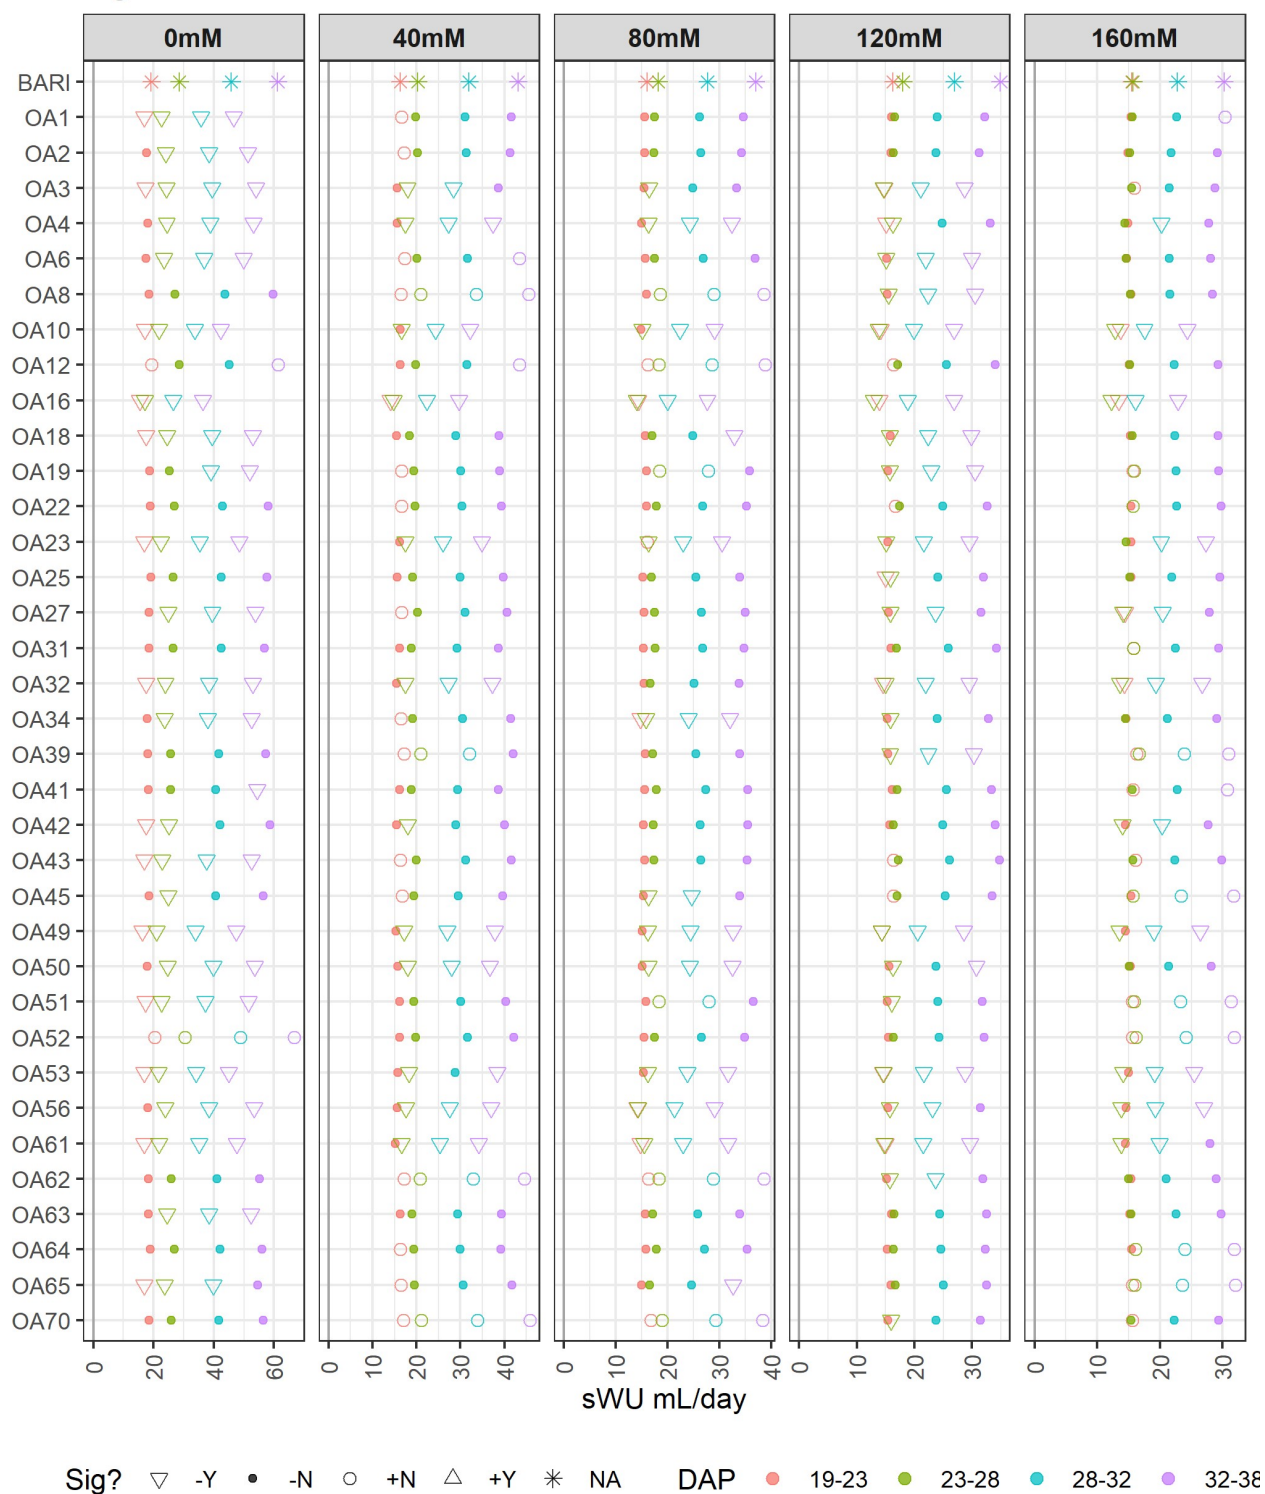

Figure S36. NaCl 0mM

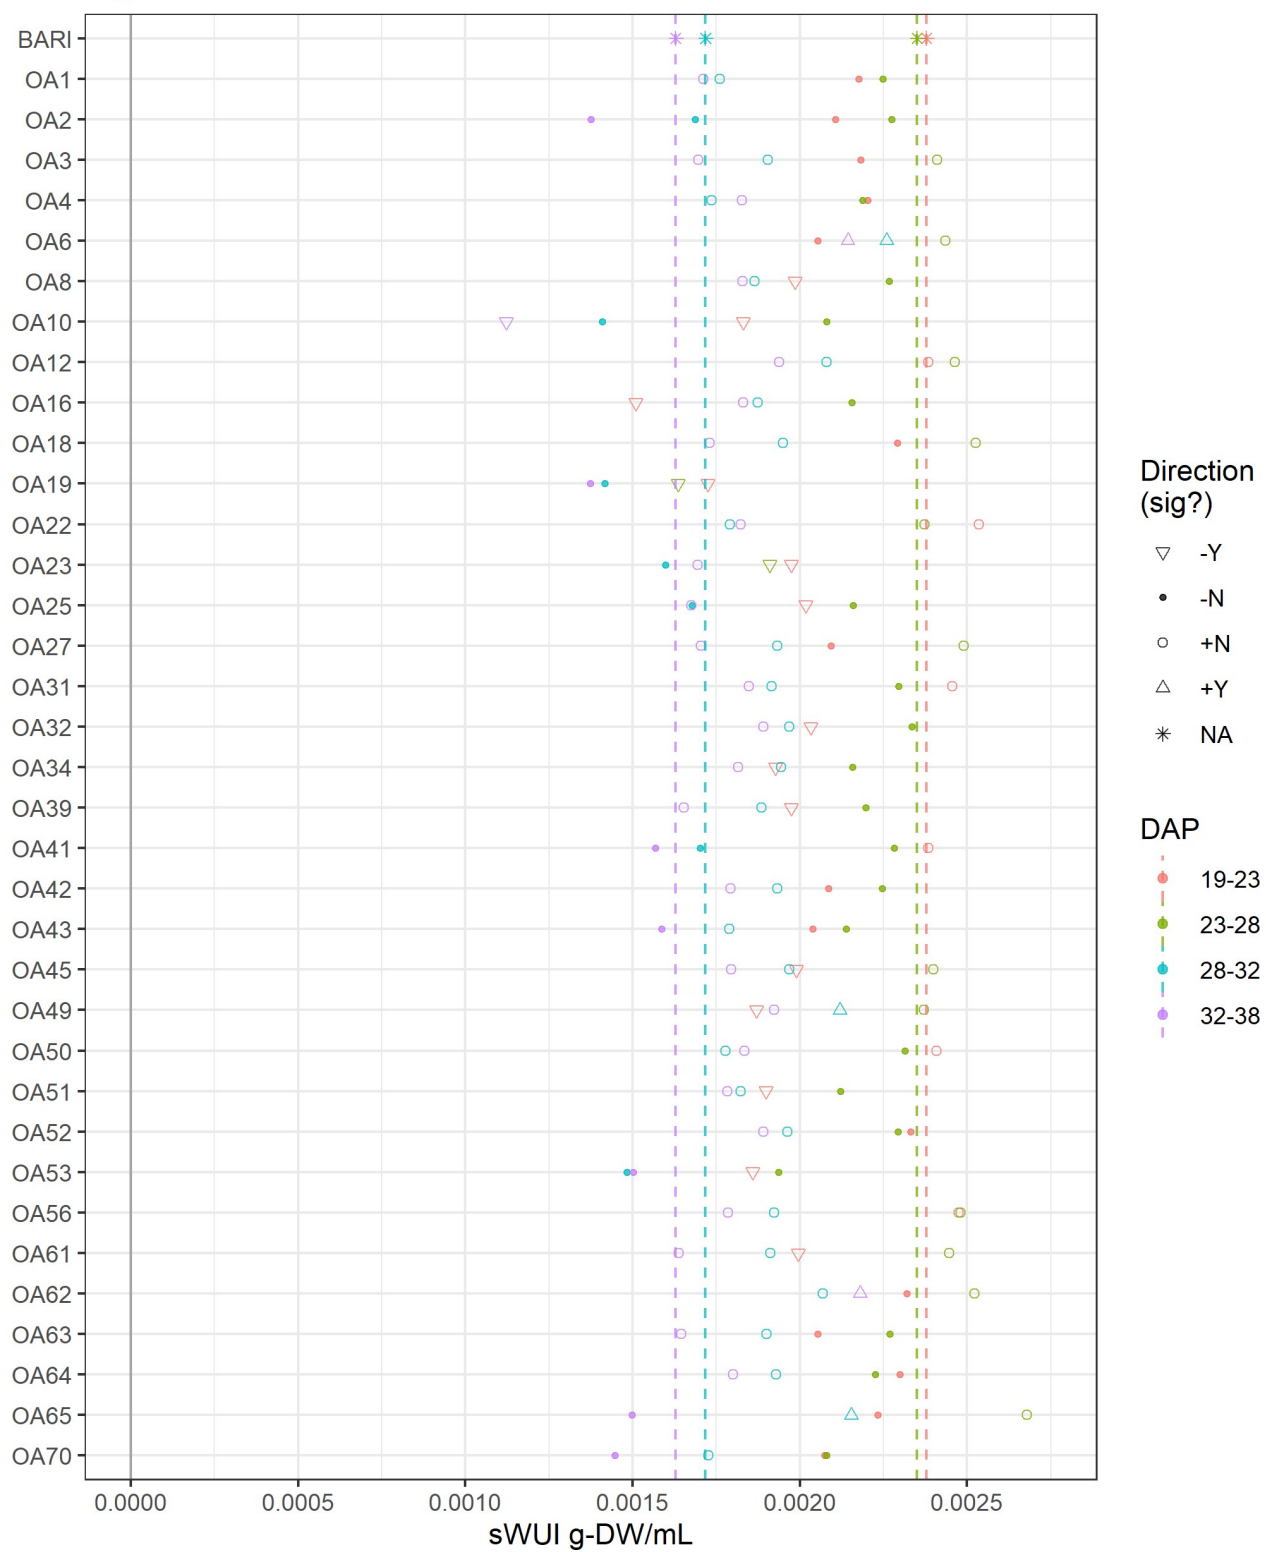

Figure S37. NaCl 40mM

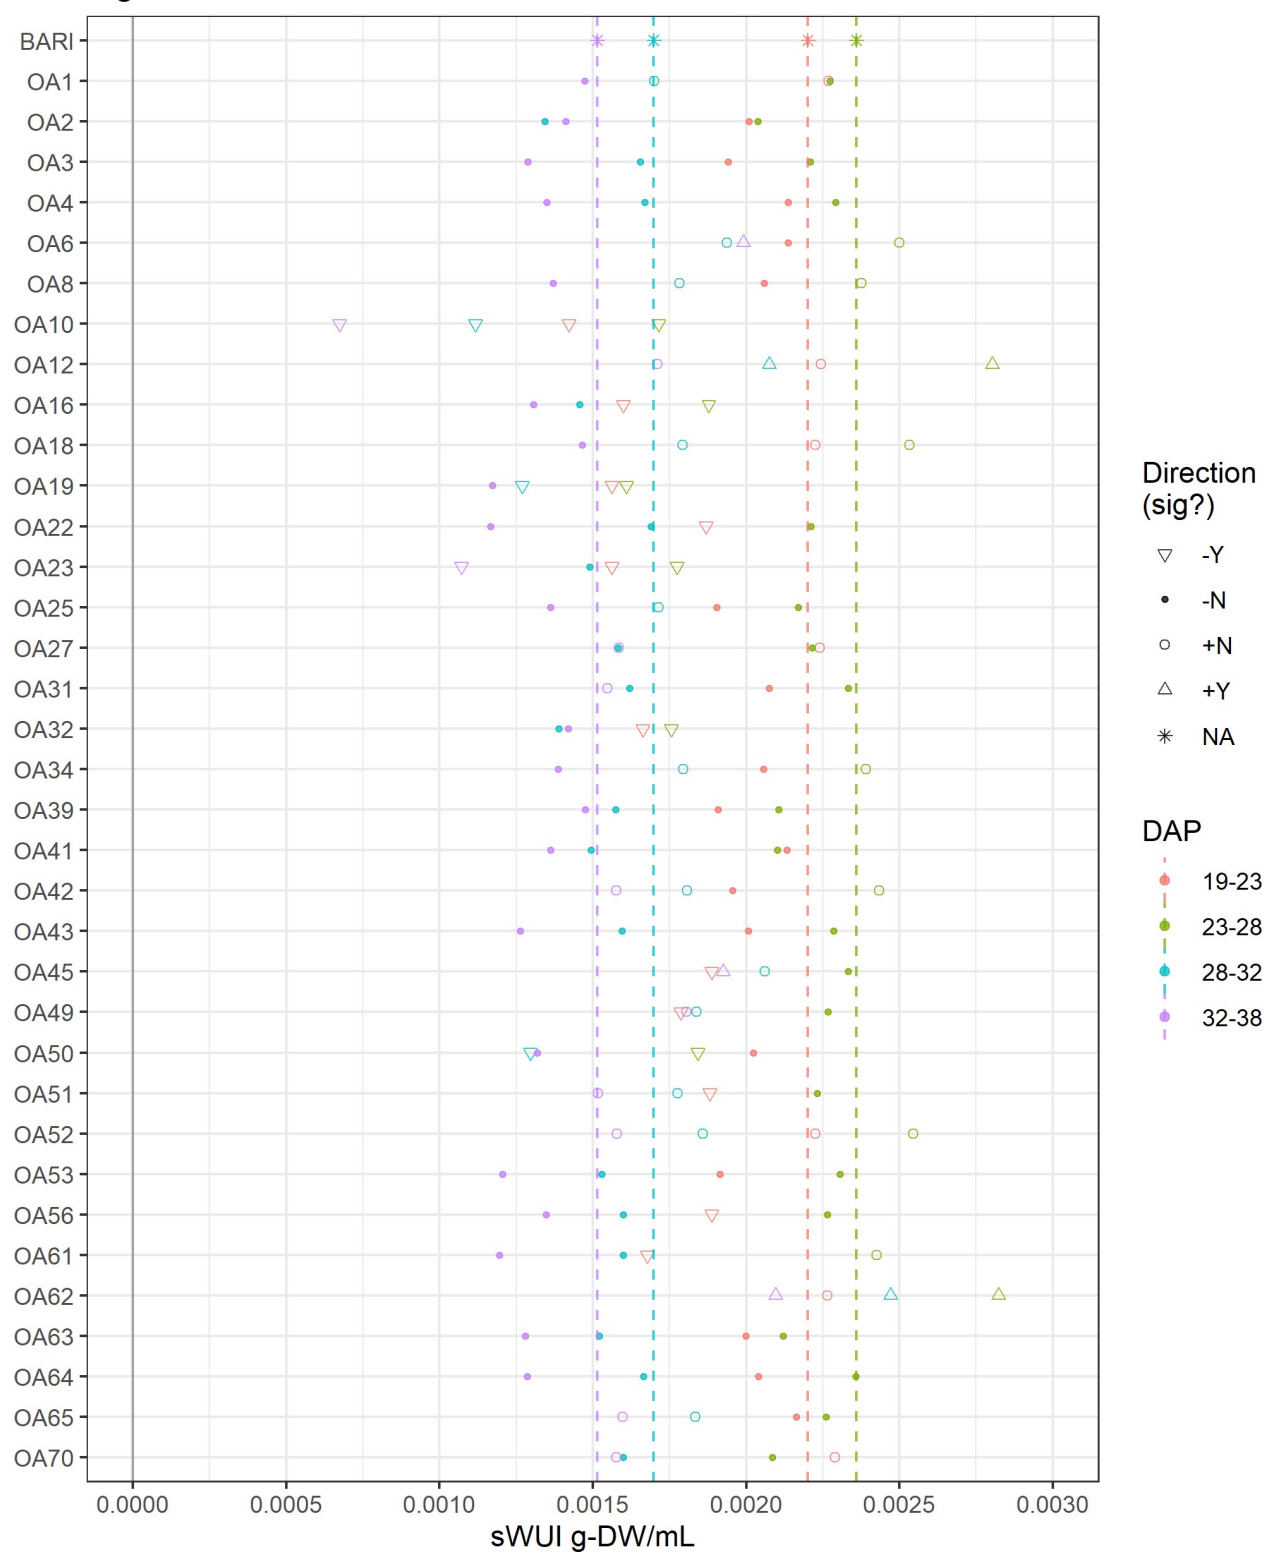

Figure S38. NaCl 80mM

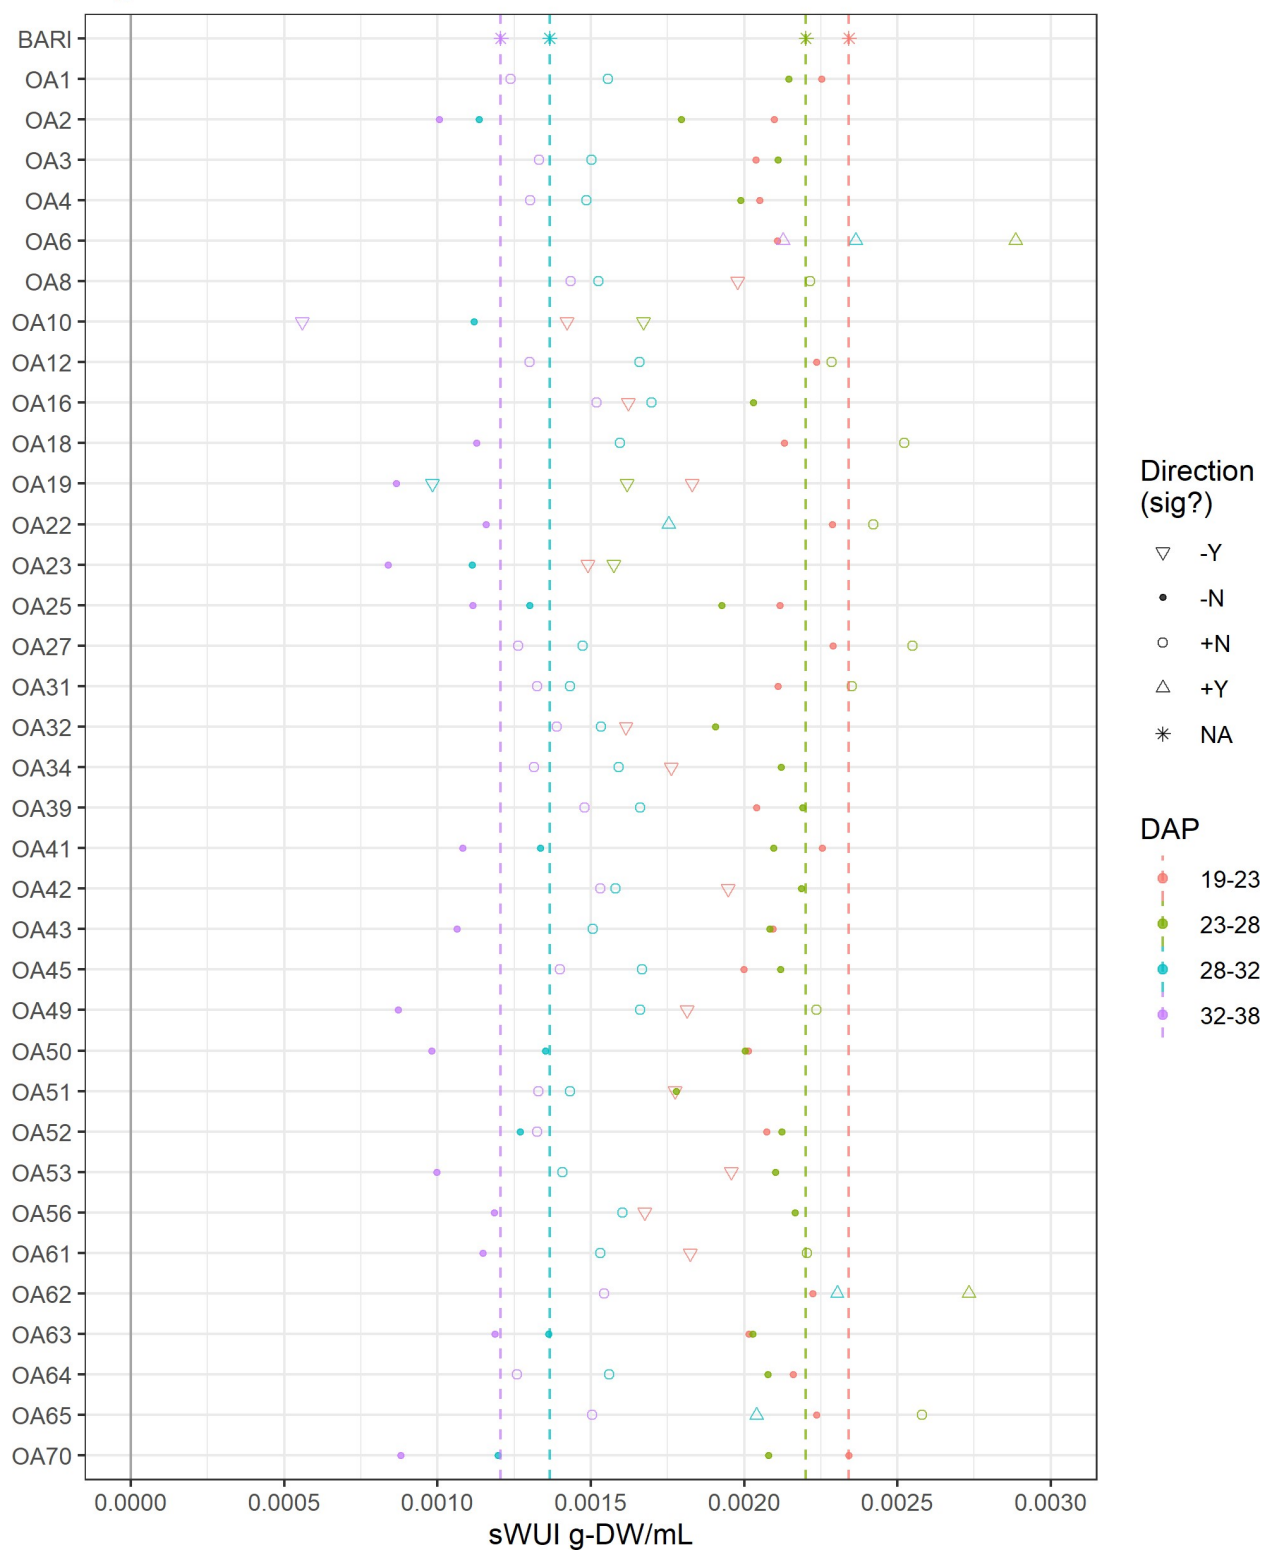

Figure S39. NaCl 120mM

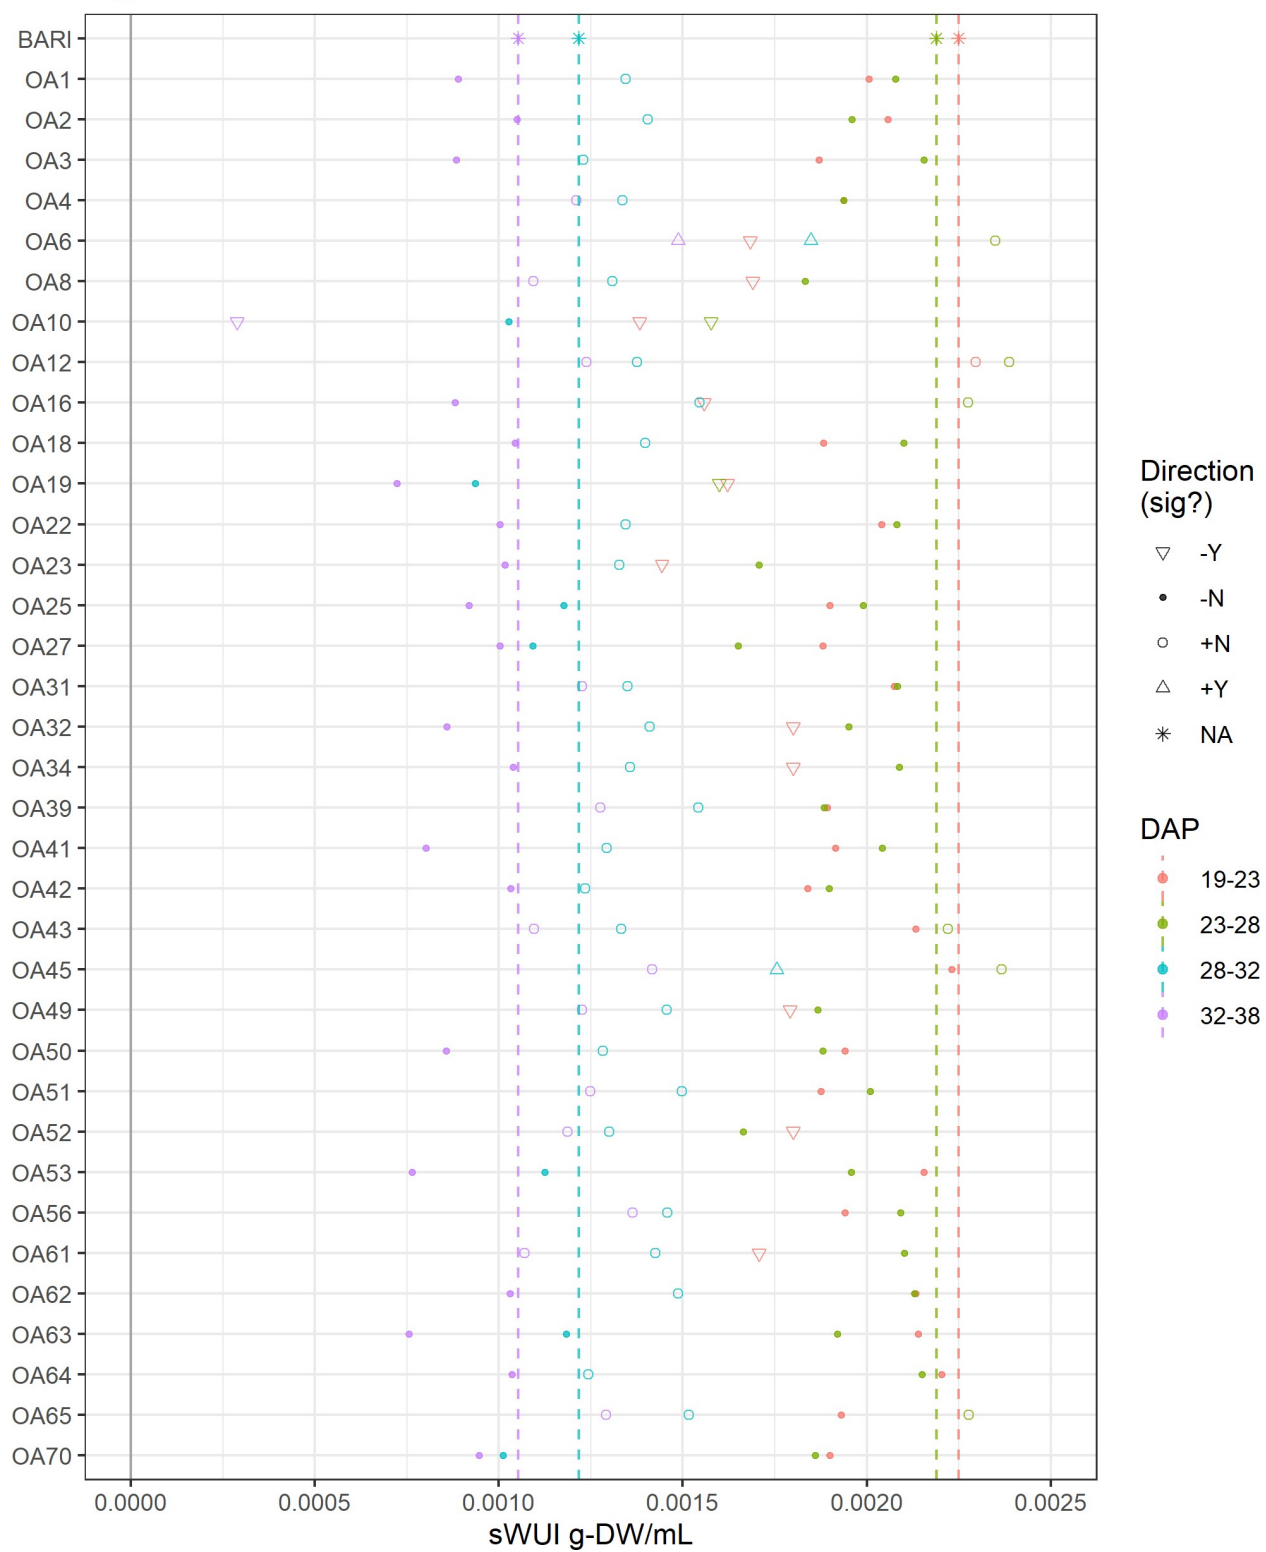

Figure S40. NaCl 160mM

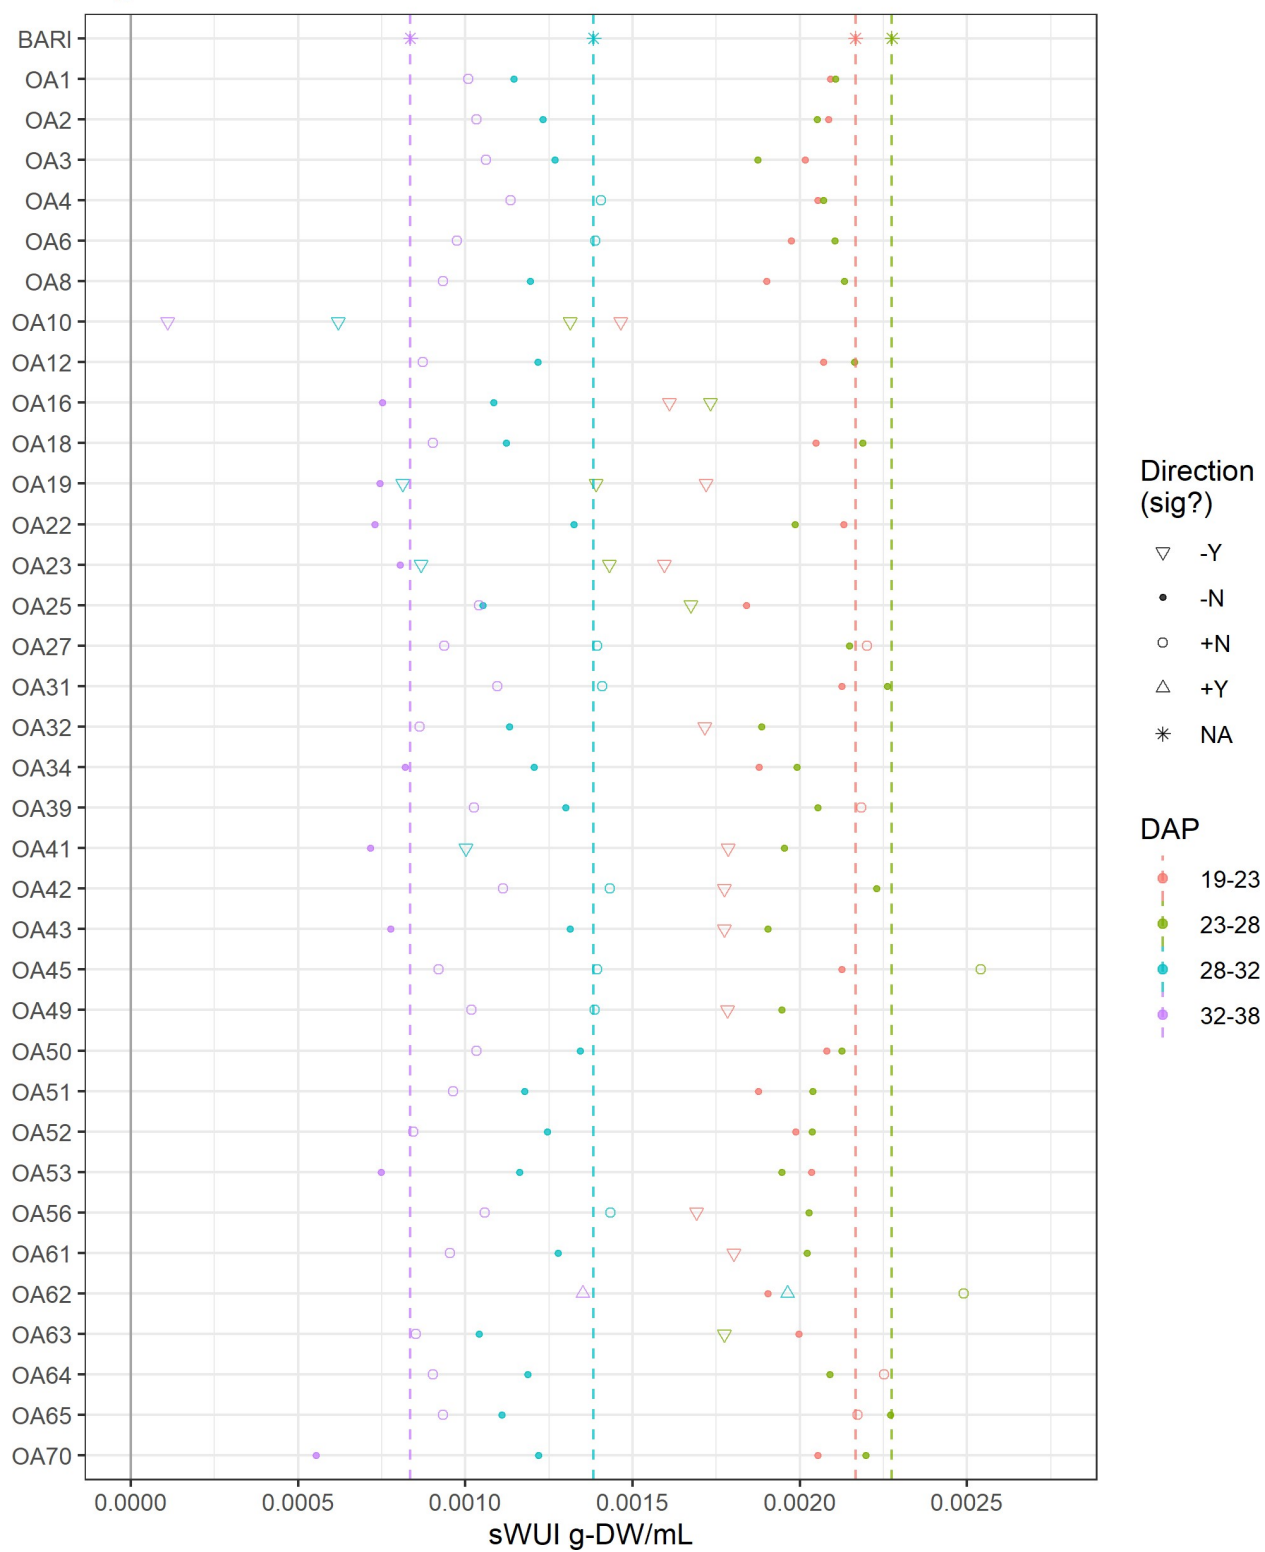

Figure S41.

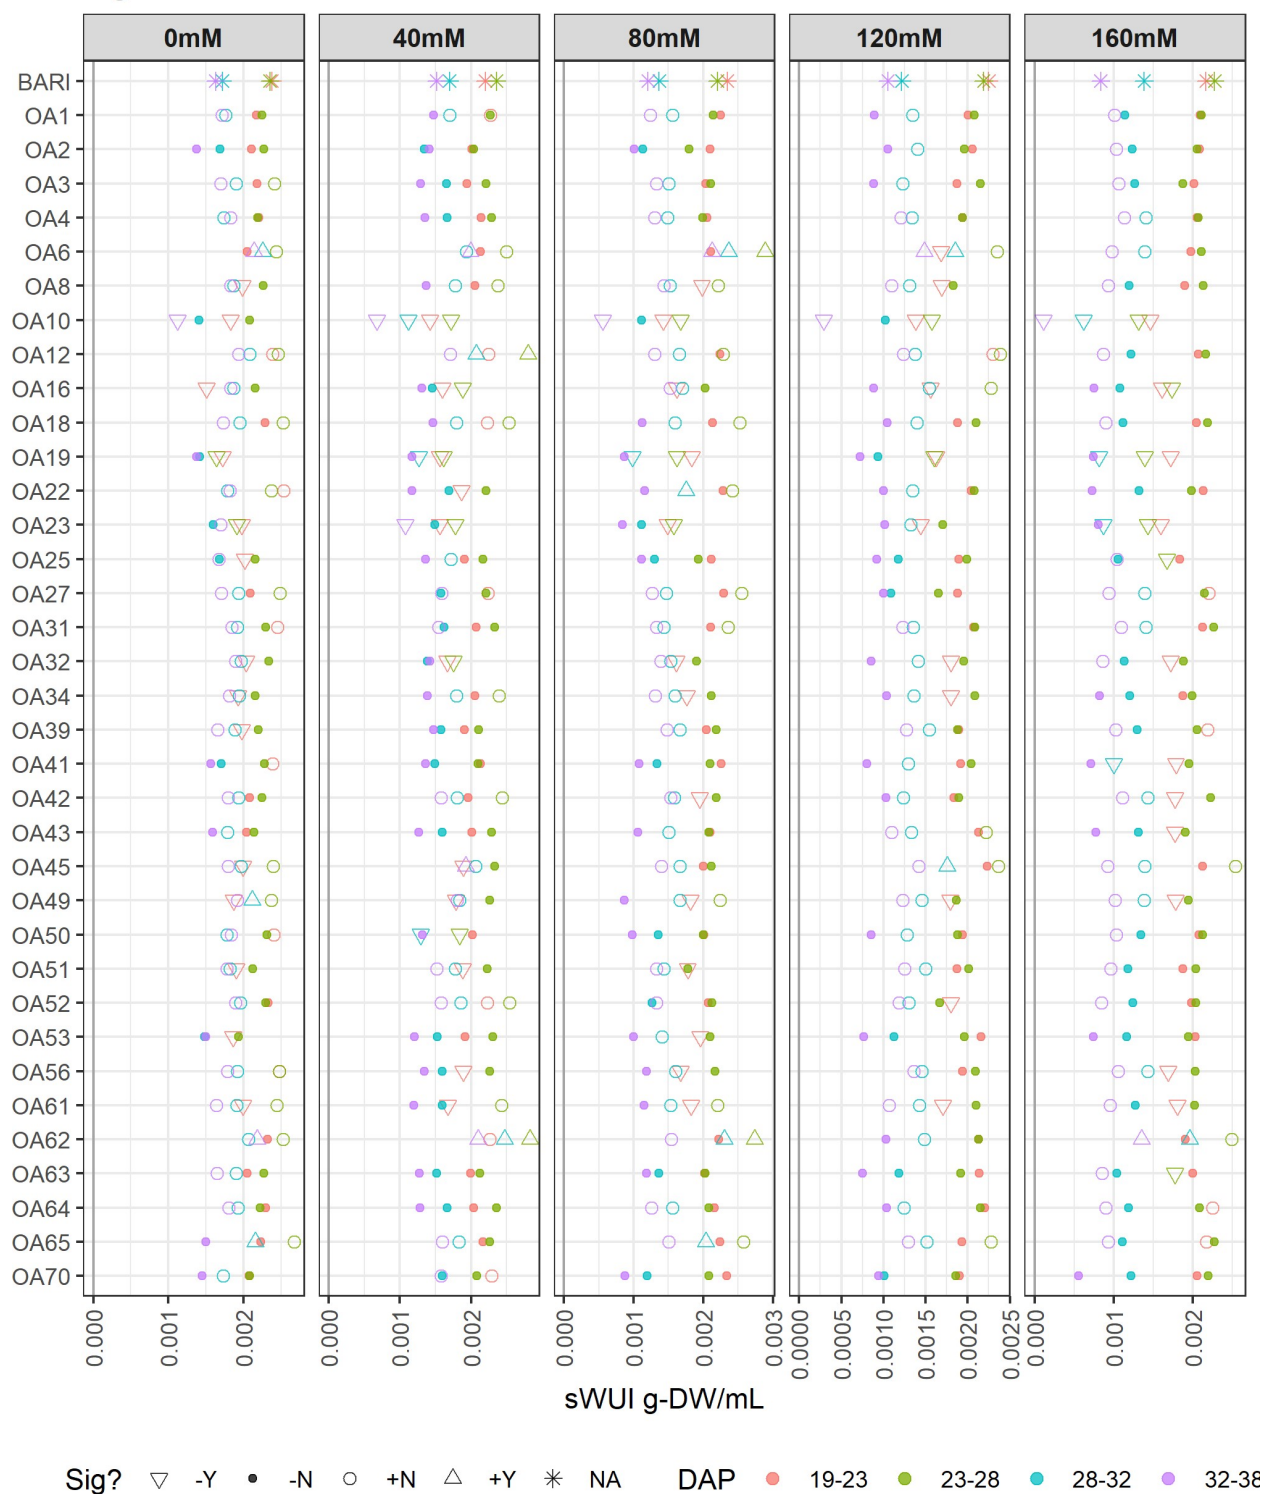

Figure S42.

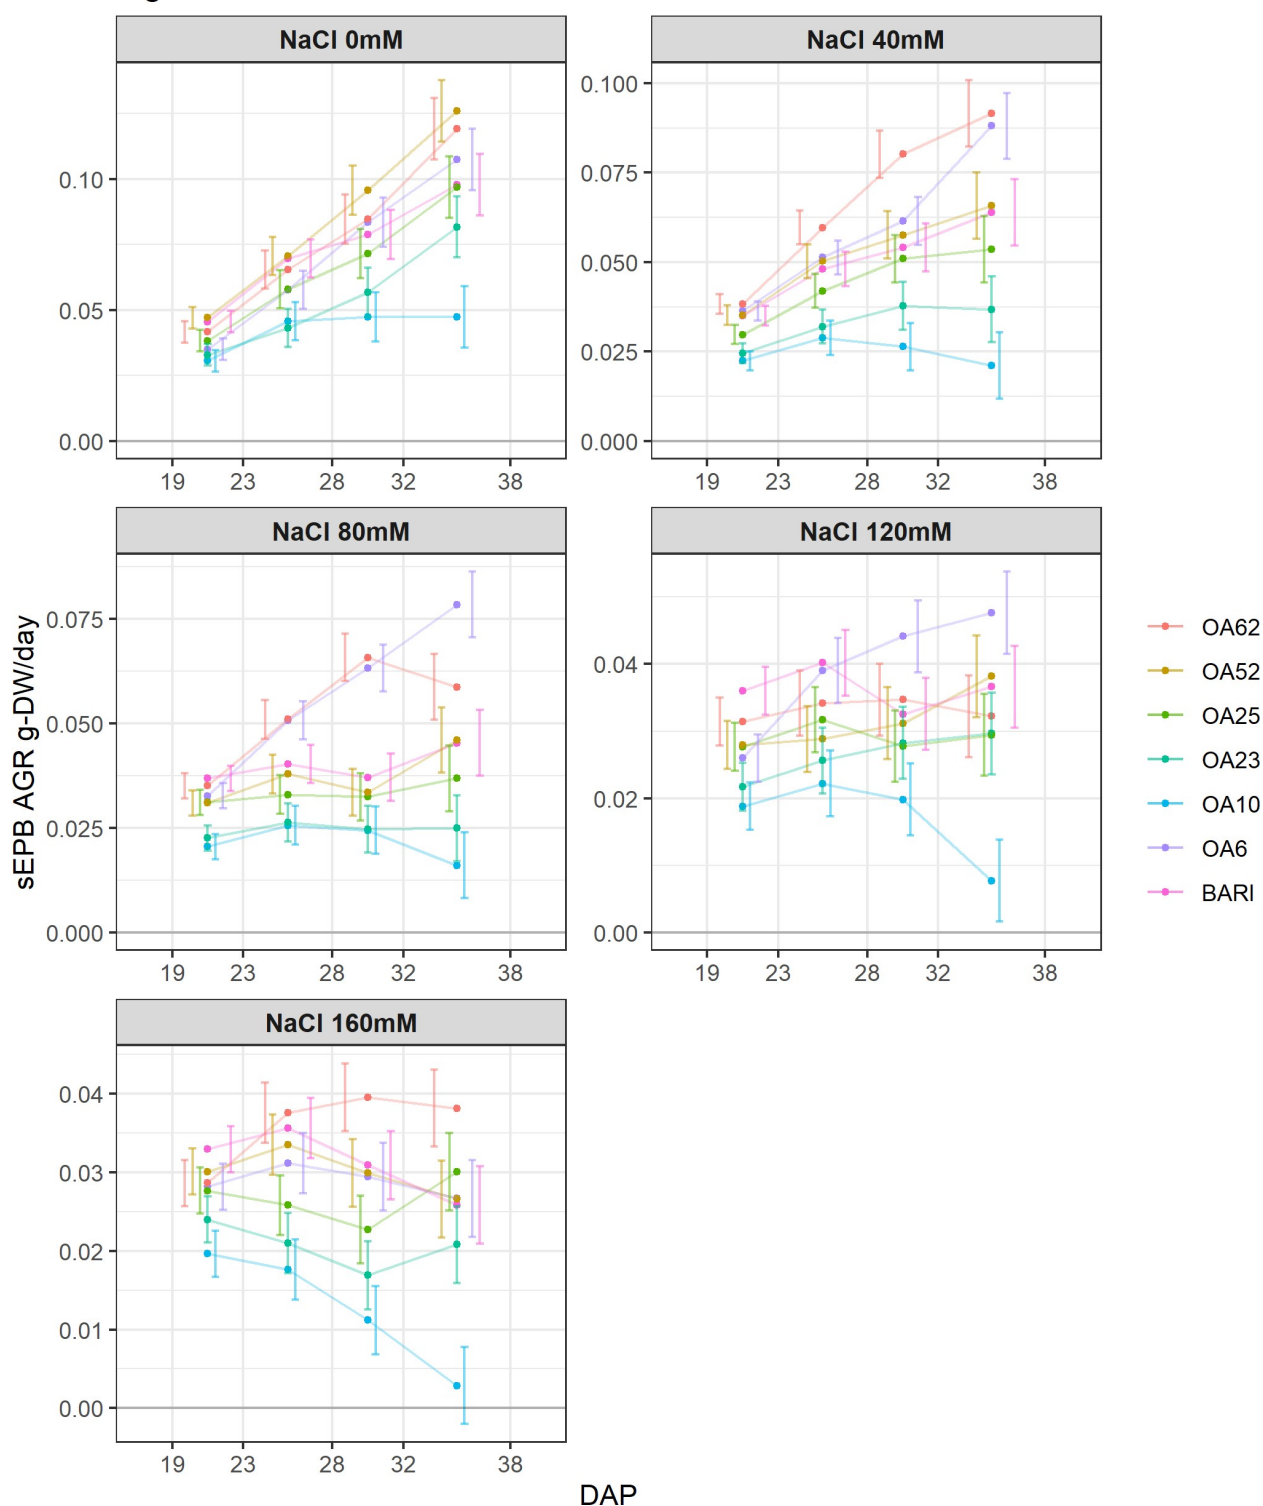

Predicted means for Absolute Growth Rate of smoothed Estimated Plant Biomass (sEPB AGR) plotted against days after planting (DAP) for seven Lines subjected to five salt concentrations. Error bars are predicted means  $\pm$  half-LSDs (5%). Two predicted means for the same DAP are significantly different ( $p \leq 0.05$ ) if their error bars do not overlap.

Figure S43.

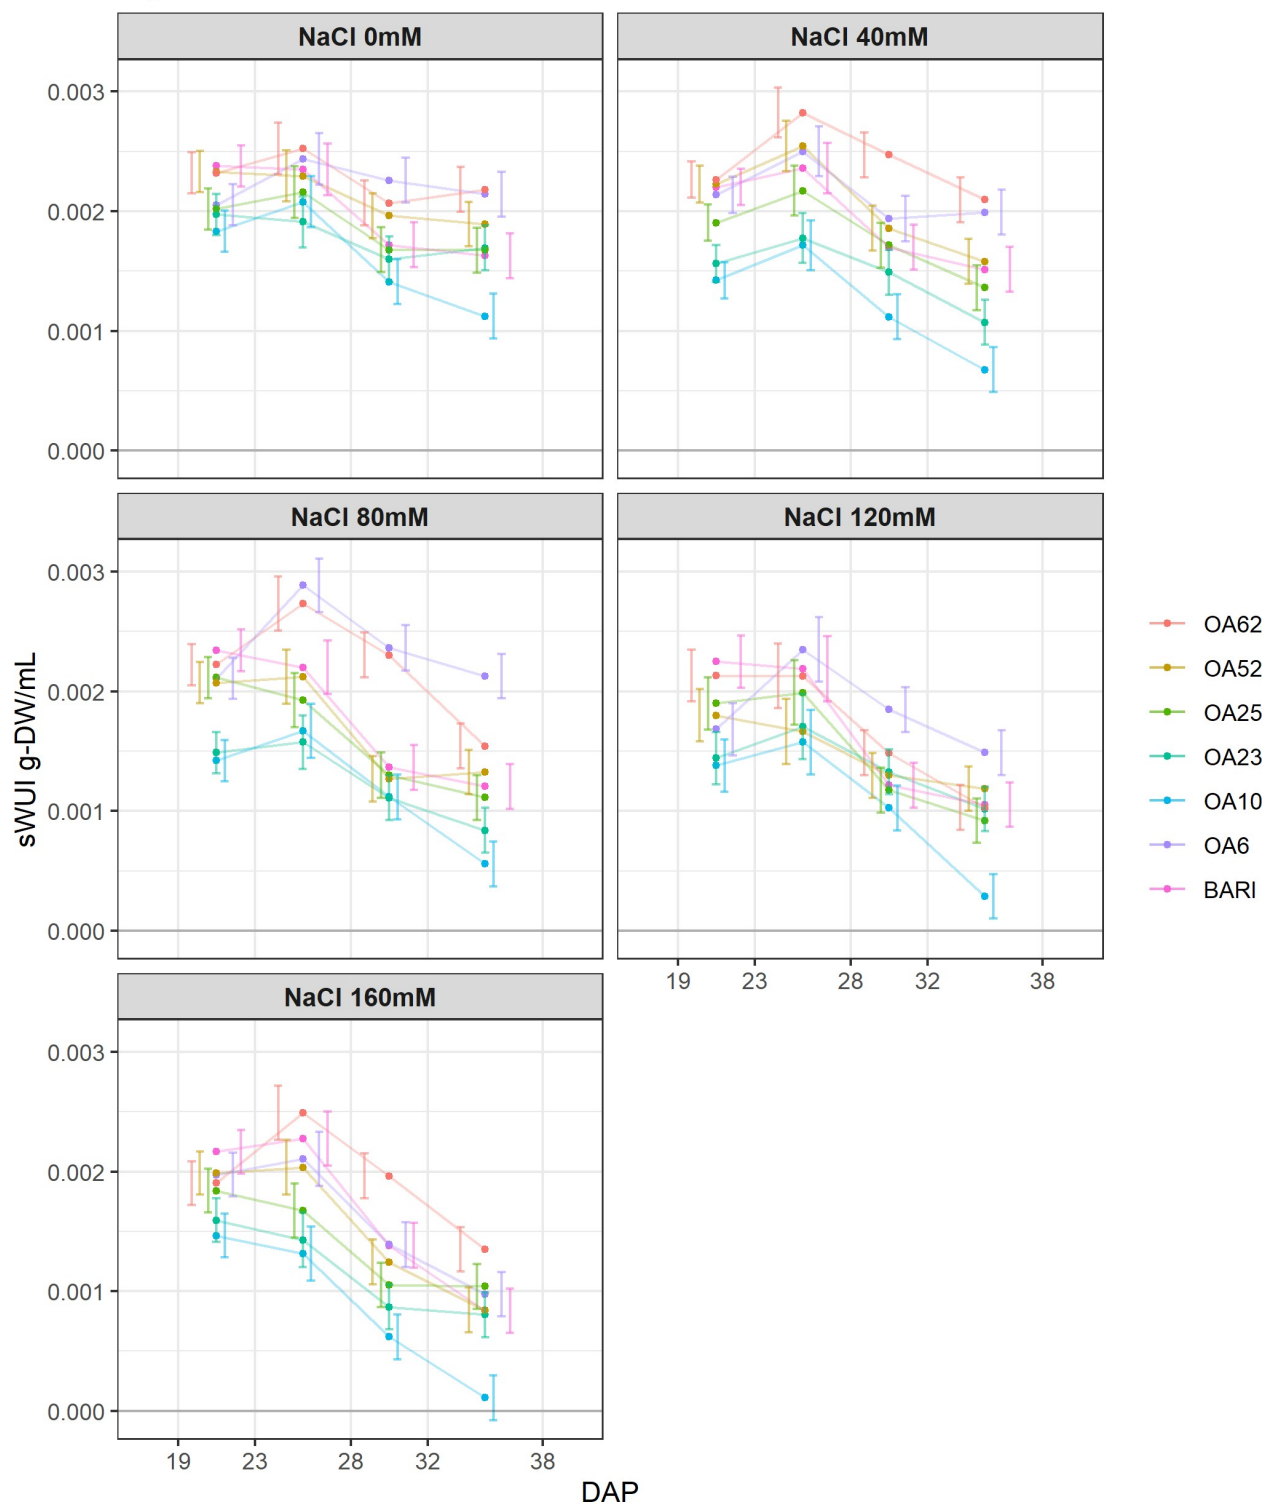

Predicted means for smoothed Water Use Index (sWUI) plotted against days after planting (DAP) for seven Lines subjected to five salt concentrations. Error bars are predicted means  $\pm$  half-LSDs (5%). Two predicted means for the same DAP are significantly different ( $p \leq 0.05$ ) if their error bars do not overlap.

Supplementary Figures S44-S46

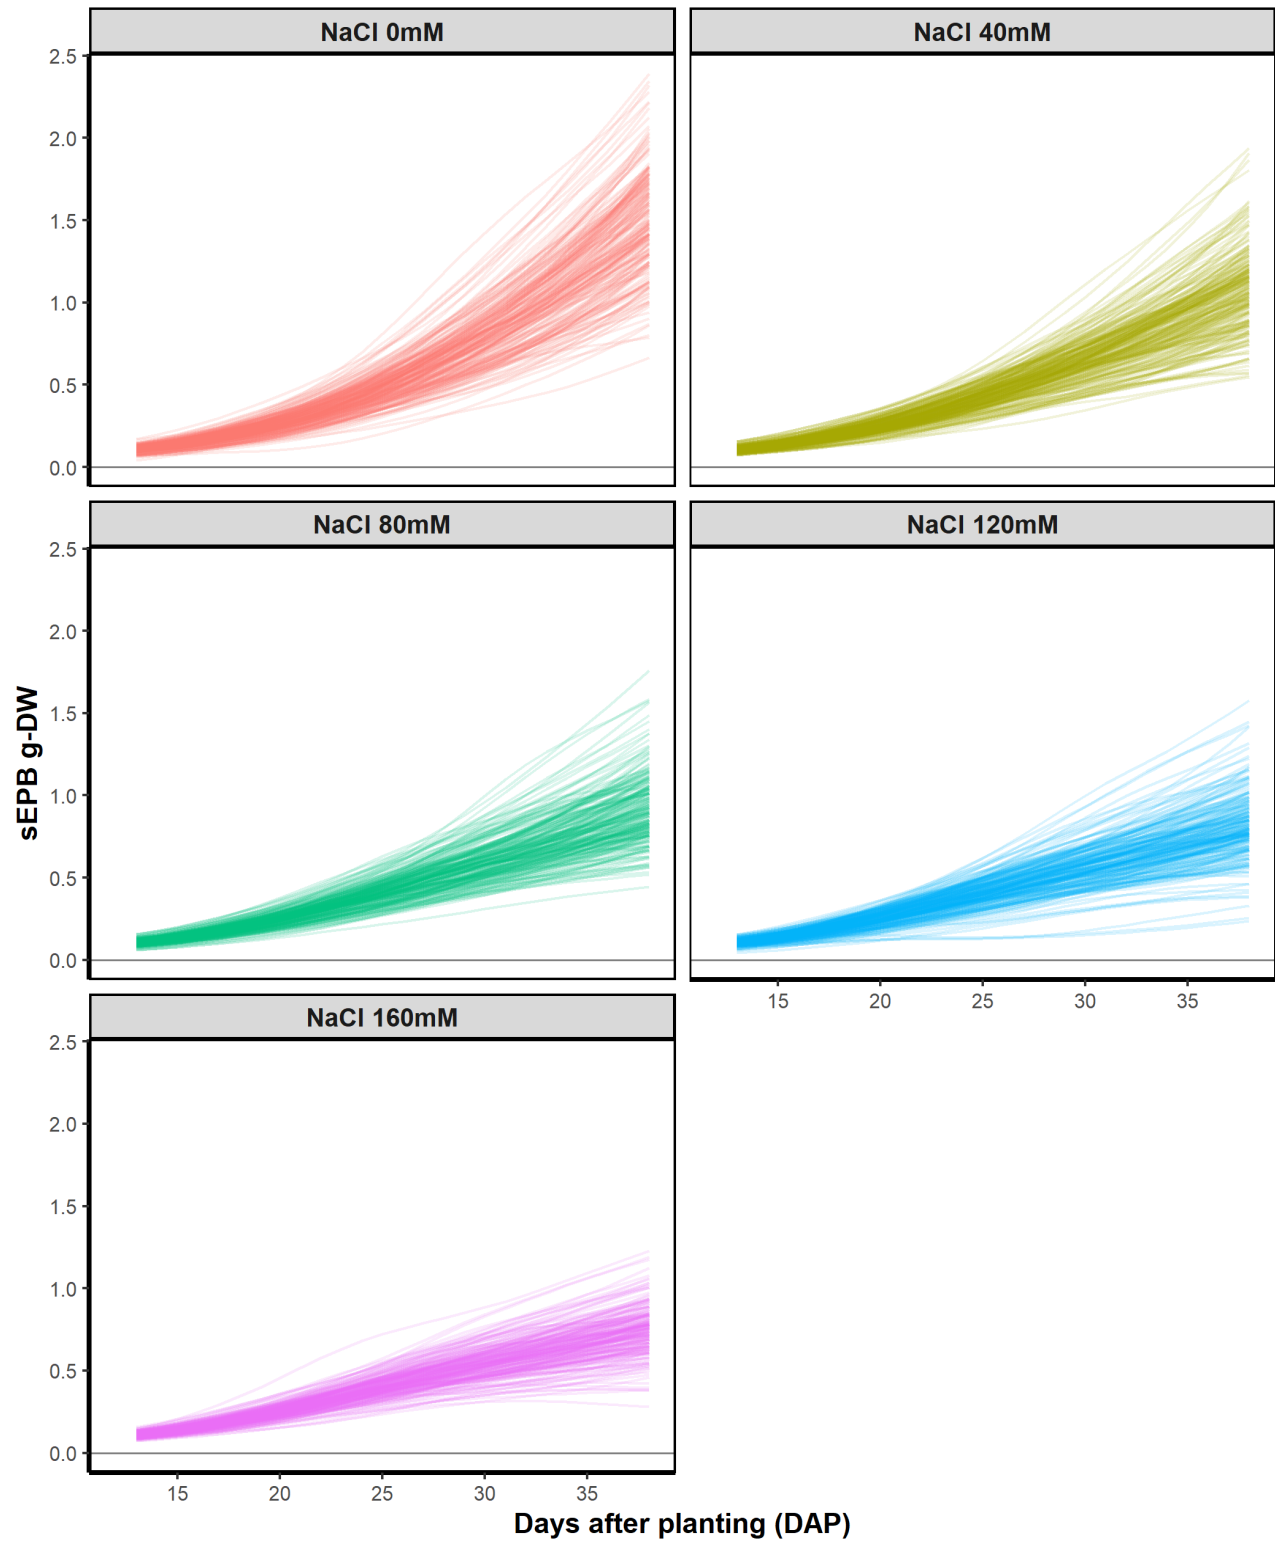

Figure S44: Descriptive plots for sEPB ( $n = 1075$ , 1 curve per plant).

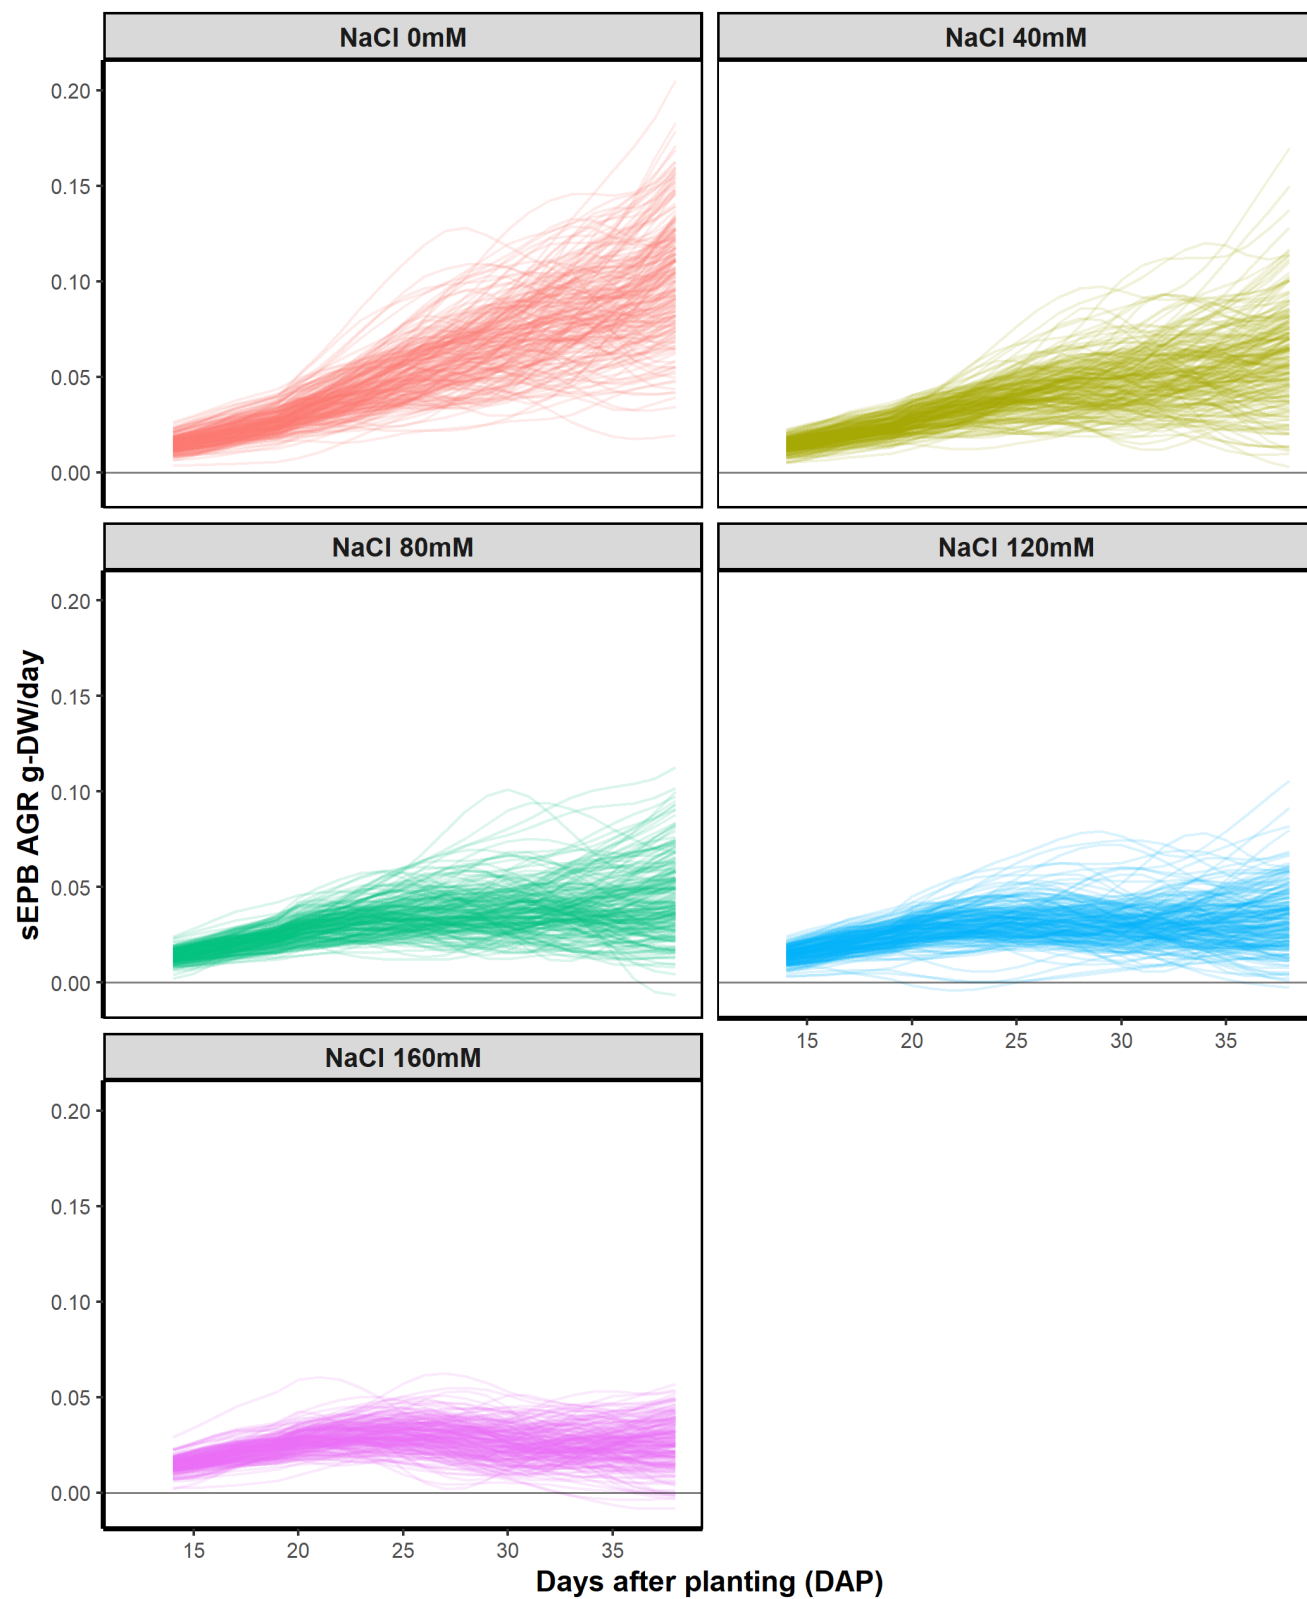

Figure S45: Descriptive plots for sEPB AGR ( $n = 1075$ , 1 curve per plant).

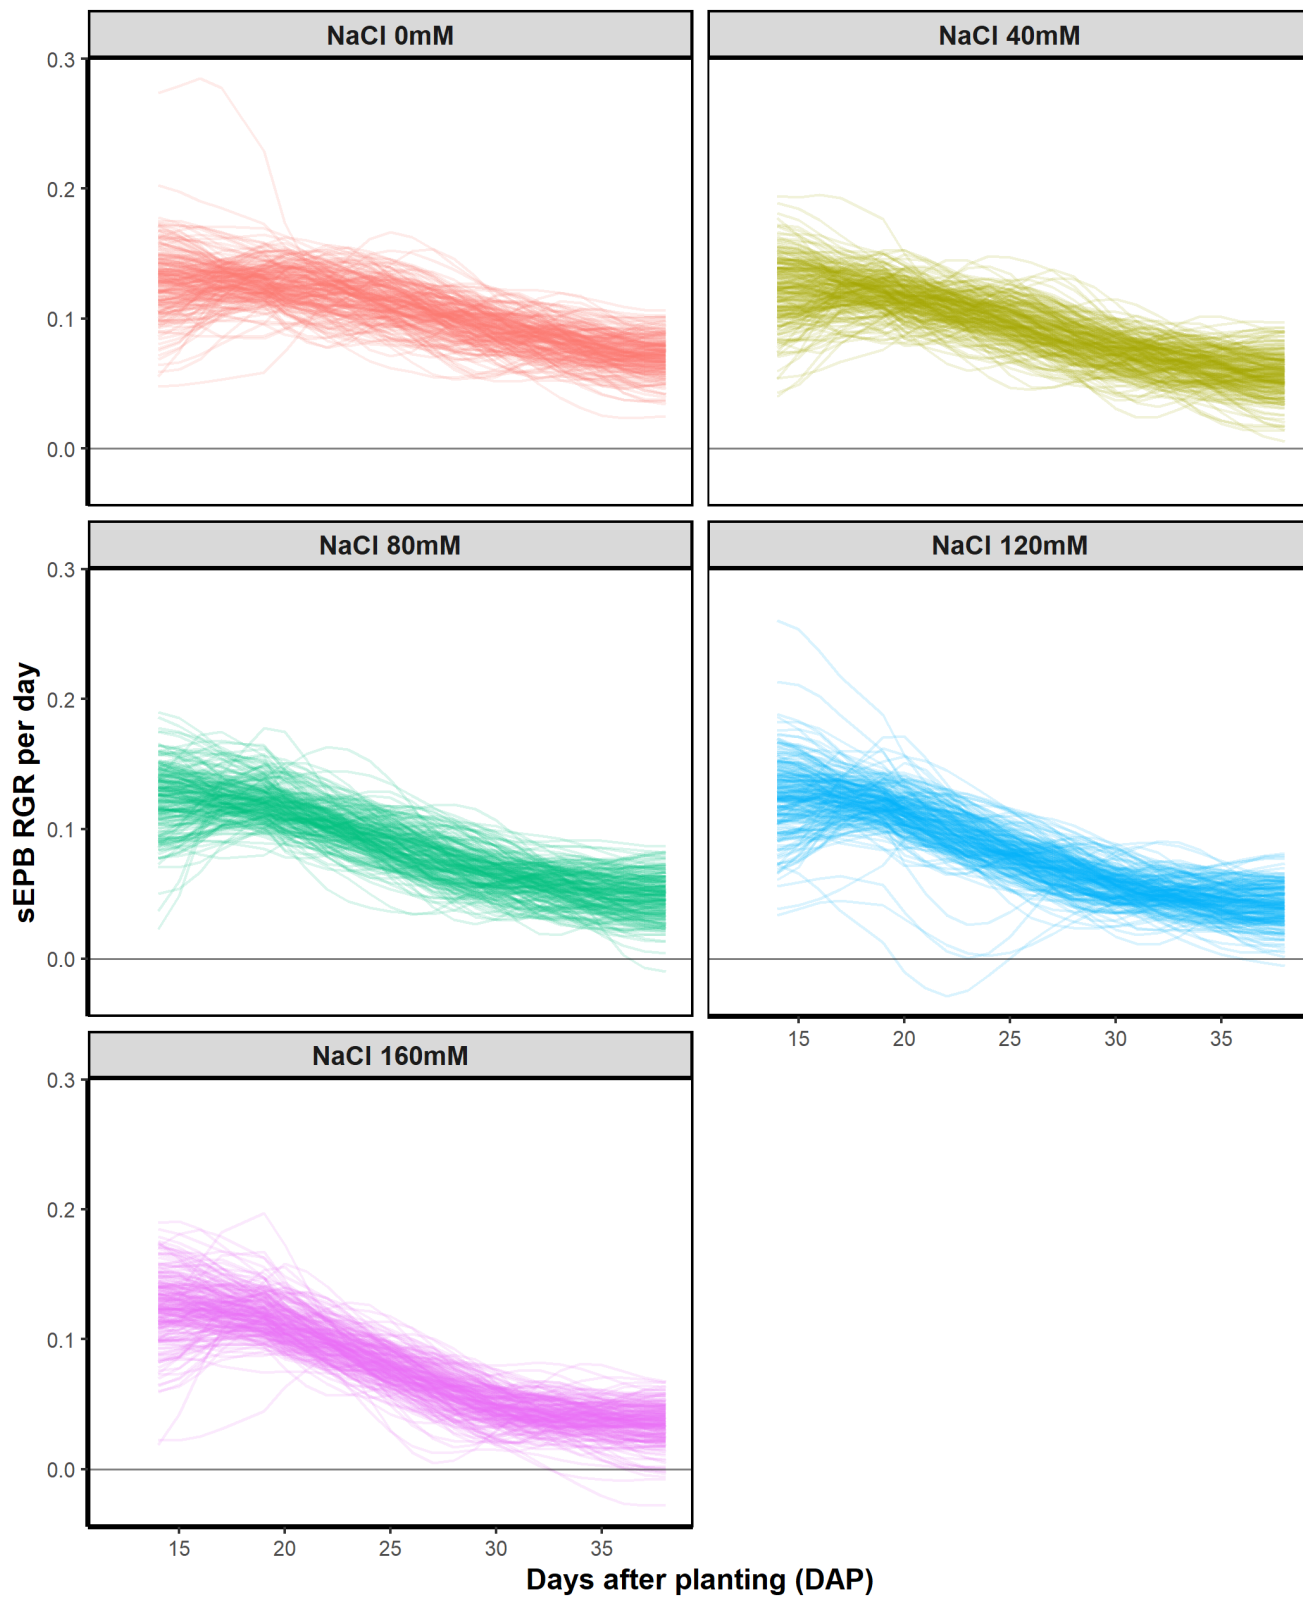

Figure S46: Descriptive plots for sEPB RGR ( $n = 1075$ , 1 curve per plant)
